# Supplementary material for: Mapping the properties of bidentate ligands with calculated descriptors (LKB-bid)
Source: Royal Society of Chemistry journal article supplement (doi:10.1039/d0dt01694b), 2020-01-01
Supplement: d0dt01694b1.xlsx [file d0dt01694b1.xlsx]

## Sheet: database
No.	D1/D2	sym/asym	He8	nHe8	BE, Zn	mean Zn-Cl	dZn-D1	dZn-D2	dD1-R, Zn	dD2-R, Zn	D1-Zn-D2	Q, Zn	BE, Pd	mean Pd-Cl	dPd-D1	dPd-D2	dD1-R, Pd	dD2-R, Pd	D1-Pd-D2	Q, Pd	BE, Au, D1	BE, Au, D2	dE, Au	bidentate	bridge length	substituent	subs2
cc01	C/C	s	19.2007	19.1016	66.1789	2.31654	0.036543	0.051044	-0.015648	-0.014554	88.6331	-0.12964	118.331	2.36327	0.02748	0.027765	-0.00712	-0.005898	88.703	-0.62746	90.0987	90.0987	0	1	3	N_Ar	Ar
cc02	C/C	s	30.6953	18.7808	74.531	2.3349	0.000507	-0.001385	-0.0153335	-0.015463	113.929	-0.15262	121.546	2.39492	0.014007	0.013114	-0.005728	-0.0056655	98.8978	-0.65792	91.4128	91.4128	0	1	6	N_R	R
cn01	C/N	a	5.59203	4.69469	56.0203	2.27	0	0	-0.01767	0.003008	74.3	-0.1213	104.783	2.337	0	0	-0.00467	0.014008	79.5771	-0.4505	90.2806			1	2	N_R/Ar	Me/Ar
cn02	C/N	a	9.50179	4.52502	57.9083	2.2793	-0.075	0.279	-0.0292435	0.010169	67.9	-0.10769	105.329	2.332	0.005	0.001	-0.005836	0.0149	79.701	-0.4432	85.9661			1	2	N_R/Ar	Me/Ar
cn03	C/N	a	7.56428	7.15828	55.7172	2.278	-0.024	0.021	-0.0161675	0.0041175	74.4	-0.1118	100.455	2.333	-0.009	-0.003	-0.0021675	0.0151175	79.69	-0.4608	89.7943			1	2	N_R/Ar	Me/Ar
cn04	C/N	a	16.0425	15.7394	56.2099	2.289	-0.027	-0.035	-0.018294	0.0025915	84.7	-0.1146	98.5113	2.344	0.001	0.013	-0.013294	0.0095915	87.5304	-0.5332	92.1739	57.0647	35.1092	1	3	N_R/Ar	Me/Ar
cn05	C/N	a	16.5244	18.368	58.6059	2.29393	-0.026147	-0.164147	-0.017465	0.0024495	85.6	-0.116	100.458	2.347	0.005	0.017	-0.012933	0.009911	87.5654	-0.5323	93.3279	56.618	36.7099	1	3	N_R/Ar	R/Ar
cn06	C/N	a	23.081	17.2138	57.095	2.29	-0.025	-0.032	-0.019007	0.0159447	90.3	-0.1311	89.7371	2.361	0.043	0.115	-0.002007	0.0249447	91.788	-0.5228	92.9661			1	3	N_R/R	Me
cn07	C/N	a	22.5528	25.7945	57.595	2.294	-0.028	-0.036	-0.0184525	0.022428	91.1	-0.1292	90.1549	2.353	0.002	0.143	-0.0094525	0.033428	86.856	-0.5529	93.2395	53.7077	39.5318	1	3	N_R/R	Me/R
cn08	C/N	a	11.8885	11.6657	56.8449	2.287	-0.005	-0.051	-0.0164005	0.004267	85.3	-0.1053	99.7493	2.342	-0.006	0.016	-0.0094005	0.010267	87.6553	-0.5131	87.0131	56.8368	30.1763	1	3	N_R/Ar	R/Ar
cn09	C/N	a	15.6098	14.496	67.73	2.30779	0.010422	-0.070623	-0.010342	0.002453	87.6412	-0.1189	110.057	2.357	0.036	-0.012	-0.004828	0.00832	87.5236	-0.569	100.779	59.7891	40.9895	1	3	N_R/Ar	R/Ar
cn10	C/N	a	19.5564	18.9547	62.1513	2.30469	-0.034743	-0.005833	-0.010856	-0.020545	86.1297	-0.12598	104.657	2.353	-0.007	0.014	-0.0120775	-0.0105	89.143	-0.5555	98.2803	53.7138	44.5665	1	3	aN_R/Ar	R/Ar
cn11	C/N	a	17.1871	17.1475	55.7581	2.294	-0.016	-0.037	-0.0156805	0.0017985	85.9	-0.1125	96.3891	2.34	-0.002	0.015	-0.0116805	0.0087985	87.628	-0.5199	92.2655	56.7774	35.4881	1	3	N_Ar/Ar	Ar
cn12	C/N	a	13.9039	13.5707	50.3087	2.28256	0.018359	-0.045015	-0.0123235	0.004661	84.9239	-0.08368	91.6511	2.33125	-0.00875	0.018371	-0.0041985	0.010789	87.3739	-0.45689	82.819	55.2055	27.6136	1	3	N_Ar/Ar	Ar
cn13	C/N	a	19.2602	19.2615	43.8704	2.28859	0.060663	0.081993	-0.0132925	0.004757	83.3063	-0.05248	81.9945	2.33243	-0.002078	0.01748	-0.0047645	0.0156585	87.1391	-0.39905	80.4973	45.2037	35.2936	1	3	N_Ar/Ar	Ar
cn14	C/N	a	15.0229	14.691	45.5473	2.27826	0.013646	-0.001306	-0.016557	0.0037765	84.3819	-0.07716	88.2356	2.32792	-0.002054	0.013019	-0.009098	0.0130665	87.9927	-0.41838	82.2051	51.9209	30.2842	1	3	N_Ar/Ar	Ar
cn15	C/N	a	20.0168	20.5929	48.3399	2.28594	0.018329	-0.119671	-0.014807	0.009393	86.5939	-0.0851	89.366	2.33866	-0.008213	0.031265	-0.0060015	0.0127335	85.9526	-0.47258	86.1846	55.8571	30.3275	1	3	N_Ar/Ar	Ar
cn16	C/N	a	13.6989	13.244	51.5725	2.28411	0.022745	-0.050446	-0.014268	0.0043425	85.0212	-0.08746	92.9949	2.33493	-0.010141	0.020787	-0.004899	0.0104675	87.5529	-0.46088	82.5107	56.5431	25.9676	1	3	N_Ar/Ar	Ar
cn17	C/N	a	22.0024	21.0241	58.2276	2.306	0.004	-0.092	-0.0108675	0.003355	92.9	-0.1078	98.0302	2.346	0.014	-0.011	-0.0078675	0.008355	89.8706	-0.5646	91.534	59.2424	32.2916	1	4	N_R/Ar	Me/Ar
cn18	C/N	a	24.4862	21.2332	59.896	2.308	-0.032	-0.085	-0.0211845	0.003813	103.3	-0.1343	101.527	2.354	0.017	-0.012	-0.0131845	0.007813	88.8149	-0.5694	89.5836	62.0321	27.5514	1	4	N_R/Ar	R/Ar
cn19	C/N	a	22.9579	20.867	58.5377	2.309	-0.017	-0.073	-0.017113	0.0051645	100.8	-0.1139	96.0079	2.346	0.018	0	-0.009113	0.0091645	89.7497	-0.5414	91.3528	60.955	30.3978	1	4	N_Ar/Ar	Ar
cn20	C/N	a	24.1076	22.6718	55.7919	2.30822	-0.010134	-0.083225	-0.0129445	0.0048785	99.4994	-0.10977	93.5798	2.3436	0.018623	0.003435	-0.004847	0.0083735	89.9136	-0.54125	90.5106	59.4972	31.0134	1	4	N_Ar/Ar	Ar
cn21	C/N	a	22.6825	22.2163	48.9099	2.29471	0.04353	-0.10817	-0.0095555	0.0053215	94.3297	-0.0878	87.3424	2.33678	0.014567	0.000147	4.15e-05	0.0087085	90.1174	-0.4816	83.0985	56.1112	26.9873	1	4	N_Ar/Ar	Ar
cn22	C/N	a	33.0295	22.439	43.4738	2.32054	0.063469	0.068972	-0.0108865	0.0085165	106.071	-0.06316	78.7568	2.33839	0.012753	0.025149	0.0013995	0.0140395	90.0552	-0.42643	83.9902	46.6565	37.3337	1	4	N_Ar/Ar	Ar
cn23	C/N	a	21.1678	19.8739	47.6763	2.28096	0.109174	0.071379	-0.0111675	0.009843	88.3756	-0.0772	87.0309	2.33314	0.002402	0.034483	-0.00518	0.0163355	90.4388	-0.44992	85.2407	53.7216	31.5192	1	4	N_Ar/Ar	Ar
cn24	C/N	a	31.8375	22.5485	50.0035	2.30519	0.017777	-0.026159	-0.0133745	0.011295	109.016	-0.0979	89.0901	2.3453	0.007796	0.009899	0.0013	0.011577	89.1439	-0.49574	86.3387	57.819	28.5197	1	4	N_Ar/Ar	Ar
cn25	C/N	a	22.7702	21.0264	50.1675	2.29284	-0.006316	-0.050604	-0.0150975	0.0073085	101.876	-0.09555	90.1576	2.33687	-0.003878	0.041693	-0.005095	0.013164	89.5761	-0.48198	85.8936	57.0689	28.8246	1	4	N_Ar/Ar	Ar
cn26	C/N	a	25.8329	24.7139	54.558	2.30044	-0.044833	0.032947	-0.0198345	0.008414	90.6575	-0.1066	93.9239	2.35491	-0.013013	0.050967	-0.019917	0.017176	90.8764	-0.54717	92.0535	50.0592	41.9943	1	4	N_R/Ar	R/Ar
cn27	C/N	a	24.7186	23.277	56.5776	2.30046	-0.041485	0.042513	-0.0195755	0.008764	89.9749	-0.10491	94.8391	2.34871	-0.009275	0.052106	-0.0178955	0.017009	91.1342	-0.54012	93.6359	49.8431	43.7928	1	4	N_R/Ar	R/Ar
cn28	C/N	a	27.6595	25.6894	54.6854	2.29753	-0.03498	0.065409	-0.01822	0.0086315	90.7785	-0.1047	92.8574	2.34563	0.00047	0.052221	-0.014901	0.0291855	91.1666	-0.52067	93.6546	48.9916	44.663	1	4	N_Ar/Ar	Ar
cn29	C/N	a	17.5475	23.3451	59.693	2.31	0.006	-0.108	-0.0109265	-0.0103265	118.6	-0.1314	100.216	2.35	0.002	0.002	-0.0129265	-0.0053265	90.1528	-0.5866	93.1287	59.8136	33.3151	1	5	N_R/Ar	Me/Ar
cn30	C/N	a	42.6439	33.0279	52.6663	2.315	0.014	-0.052	-0.0097375	0.004314	112.5	-0.1256	91.2159	2.356	0.008	0.027	-0.0117375	0.012314	94.529	-0.5419	89.9958	59.6795	30.3162	1	5	N_Ar/Ar	Ar
cn31	C/N	a	20.8735	20.84	55.1323	2.2993	-0.023066	0.053851	-0.0166825	0.007457	87.0378	-0.10948	94.3363	2.34897	0.001515	0.029855	-0.0114295	0.012255	86.0647	-0.53536	92.5421	57.6965	34.8456	1	3	N_Ar/Ar	Ar
cn32	C/N	a	17.3002	17.2651	56.3005	2.29476	-0.015345	-0.045833	-0.0153555	0.001796	85.8466	-0.11439	96.9356	2.3409	-0.002385	0.016815	-0.0110885	0.0087195	87.6586	-0.52594	92.4542	57.6035	34.8506	1	3	N_Ar/Ar	Ar
cn33	C/N	a	21.0703	20.3706	46.6141	2.29929	0.006595	0.123	-0.014621	0.002927	81.7	-0.06779	85.4614	2.34024	0.00428	0.01072	-0.011813	0.0152895	87.1215	-0.45512	91.1383	47.2578	43.8805	1	3	N_Ar/Ar	Ar
cn34	C/N	a	17.2864	17.0109	53.4101	2.28932	-0.022254	-0.00691	-0.0157325	0.002299	84.6706	-0.10027	94.4233	2.33529	0.006222	0.004827	-0.0125815	0.013195	88.0742	-0.46543	89.0487	53.4413	35.6074	1	3	N_Ar/Ar	Ar
cn35	C/N	a	31.3	23.9675	57.1655	2.3191	-0.018966	-0.006141	-0.017544	0.0102285	107.905	-0.12163	96.1523	2.3554	0.014521	0.007426	-0.006846	0.011363	87.9079	-0.55464	92.2502	56.4194	35.8308	1	4	N_Ar/Ar	Ar
cn36	C/N	a	22.8708	20.7404	59.4334	2.30982	-0.016627	-0.070865	-0.0154385	0.003827	101.297	-0.11703	96.7883	2.34736	0.01854	-0.001549	-0.0075285	0.0070275	89.9888	-0.54663	92.3191	56.445	35.8741	1	4	N_Ar/Ar	Ar
cn37	C/N	a	32.9096	22.9542	48.9399	2.32979	0.025537	0.116	-0.01551	0.0075125	105.4	-0.09226	86.3382	2.34737	0.023165	0.016241	-0.0070905	0.0140145	89.7772	-0.47961	91.4777	45.5804	45.8973	1	4	N_Ar/Ar	Ar
cn38	C/N	a	23.9327	19.943	54.3963	2.29666	-0.038913	0.007757	-0.0181135	0.0035995	103.266	-0.12622	92.8746	2.34363	0.0103	0.017344	-0.014264	0.0155145	90.268	-0.50091	91.2477	56.0658	35.1819	1	4	N_Ar/Ar	Ar
co_ch01	C/O	a	19.0928	17.8849	81.638	2.34814	-0.000209	-0.000169	-0.0171	0.022465	98.5131	-0.16294	114.412	2.37947	-0.000443	-3.8e-05	-0.014872	0.026994	90.3504	-0.64487	106.99	79.4059	27.5841	1	4	N_R	Me
co_ch02	C/O	a	19.0379	17.8801	80.0038	2.35546	0.014028	0.004998	-0.017828	0.024639	97.8351	-0.17825	114.74	2.38254	0.000616	-0.002278	-0.0148355	0.027276	89.8274	-0.63814	107.001	79.4245	27.5765	1	4	N_R	Me
co_ch03	C/O	a	19.8614	18.4262	81.8173	2.34929	0.000329	0.005173	-0.0173945	0.022754	98.8294	-0.16197	115.063	2.38172	0.001852	-0.000597	-0.0159645	0.082037	90.4123	-0.64348	106.964	79.3063	27.6575	1	4	N_R	R
co_ch04	C/O	a	26.282	23.4275	79.5448	2.34845	0.032639	-0.001028	-0.009352	0.022692	98.3478	-0.14722	111.189	2.37781	0.020818	0.002961	-0.0070695	0.030417	86.4119	-0.63487	103.833	79.1896	24.6429	1	4	N_R	R
co_ch05	C/O	a	20.4389	19.3351	76.7377	2.33851	0.021176	0.007388	-0.013766	0.018313	96.5132	-0.15781	111.132	2.37515	0.001092	0.009058	-0.0128215	0.030616	87.7259	-0.62341	104.513	78.1452	26.3673	1	4	N_Ar	Ar
co_ch06	C/O	a	18.9953	17.793	81.3073	2.34647	0.001478	-0.002305	-0.0170345	0.023684	98.6295	-0.16287	114.827	2.38096	0.002753	-0.000535	-0.014113	0.027592	89.7518	-0.6371	106.785	75.2032	31.5819	1	4	N_R	Me
co_ch07	C/O	a	17.7117	16.5225	75.9714	2.33309	0.007378	0.021778	-0.01773	0.023573	97.4288	-0.17166	111.019	2.37577	0.003036	0.005979	-0.014635	0.026494	89.8103	-0.61628	104.46	70.6503	33.8096	1	4	N_R	Me
co01	C/O	a	7.29178	19.6161	52.0045	2.27947	0.004579	0.027153	-0.019181	0.012285	81.3641	-0.11606	83.6757	2.3277	0.000325	-0.06642	-0.0105055	0.021365	86.3252	-0.46579	91.5622	91.3749	0.187248	1	3	N_R	Me
co02	C/O	a	14.4983	13.499	52.7209	2.27777	-0.000179	0.000316	-0.019098	0.0314405	82.8499	-0.12051	85.0885	2.33255	0.000196	7.7e-05	-0.0121085	0.0377355	88.3192	-0.46594	91.3583	38.4817	52.8766	1	3	N_R/R	R/Me
cp01	C/P	a	19.4717	12.9224	55.5294	2.30049	-0.000422	0.000257	-0.013967	-0.010876	88.7285	-0.12097	113.384	2.38175	0.000197	-0.00016	-0.00832	-0.0242773	92.4568	-0.75573	89.6269	73.8871	15.7398	1	3	N_R/R	Me
cp02	C/P	a	20.0003	13.6612	53.964	2.301	0	0.009	-0.0119545	-0.00382833	85.4	-0.1046	109.462	2.381	-0.001	0.019	-0.0079545	-0.0118283	91.6975	-0.7297	92.3576	72.6124	19.7452	1	3	N_R/Ar	Me/Ph
cp03	C/P	a	20.0137	14.0712	56.4801	2.302	0.003	-0.031	-0.015155	-0.0141007	88.3	-0.1203	113.77	2.379	-0.004	0.015	-0.012155	-0.0211007	90.4678	-0.7528	92.6247	74.1182	18.5065	1	3	N_R/R	Me/R
mcc01	C/C	s	28.1556	24.6905	79.0817	2.35	0.025	0.027	-0.014	-0.013	109.8	-0.1267	130.129	2.381	0.013	0.014	-0.013	-0.013	94.9366	-0.7178	90.4416	90.4416	0	0	0	N_R	Me
mcc02	C/C	s	34.3353	32.284	75.5043	2.357	0.02	0.049	-0.011	-0.006	117.7	-0.1368	126.529	2.39	0.033	0.039	-0.007	-0.005	98.7337	-0.703	92.3474	92.3474	0	0	0	N_R	R
mcc03	C/C	s	45.0052	49.7213	61.3652	2.345	0.054	0.048	-0.006	-0.006	126.6	-0.1628	100.964	2.38744	0.052382	0.053619	0.0015685	0.002005	111.583	-0.62364	90.4467	90.4467	0	0	0	N_Ar	Ar
mcn02	C/N	a	20.8213	18.9118	62.7395	2.316	0.013	-0.074	-0.009	0.00409	106.5	-0.1164	102.041	2.356	0.018	0.033	-0.009	0.01109	92.6358	-0.5386	92.3474	104.741	-12.3933	0	0	N_R/Ar	R/Ar
mcn03	C/N	a	25.0589	22.3373	63.847	2.325	0	-0.091	-0.014	0.00409	114.2	-0.12	97.1412	2.353	0.023	0.008	-0.004	0.00909	95.4368	-0.5284	90.4467	104.741	-14.2941	0	0	N_Ar/Ar	Ar
mnn01	N/N	s	12.9561	11.3632	51.5077	2.28341	-0.065013	-0.002943	0.004826	0.004813	101.877	-0.09034	74.6954	2.31571	0.000369	0.001462	0.0095295	0.0095855	91.4943	-0.39038	56.0711	56.0711	0	0	0	Ar	Ar
mcn01	C/N	a	18.3156	16.1062	65.6392	2.313	0.01	-0.084	-0.013	0.00409	104.6	-0.1115	102.973	2.348	0.009	0.016	-0.014	0.01109	93.3471	-0.5486	90.4416	104.741	-14.2991	0	0	N_R/Ar	Me/Ar
nn_ch01	N/N	s	18.3861	18.3409	83.7817	2.33979	-0.146201	-0.148213	0.000849	0.0005725	92.7405	-0.17294	113.415	2.38171	-0.076225	-0.076458	0.0060245	0.006049	92.3397	-0.59617	92.5298	92.5298	0	1	3	R	Me
nn_ch02	N/N	s	18.0936	16.1515	88.4313	2.34653	0	0	0.0075275	0.071063	93.7731	-0.16866	115.282	2.39379	-0.000301	-0.000301	0.012592	0.0140115	92.5048	-0.56425	93.946	93.946	0	1	3	R	Me
nn_ch03	N/N	s	15.9089	14.8825	68.8332	2.33296	0.028344	0.032254	0.0160935	0.017513	92.1081	-0.13764	90.5247	2.36052	-0.010484	-0.00854	0.023324	0.0241185	88.7144	-0.53854	77.785	77.785	0	1	3	Ar	Ph
nn01	N/N	s	8.39552	7.19722	39.0279	2.253	0.008	0.009	0.0156507	0.0155863	64.7	-0.1077	62.3949	2.302	-0.025	-0.025	0.0186507	0.0185863	68	-0.1077	58.6484	58.6484	0	1	1	R	H/Me
nn02	N/N	s	14.4295	14.2915	35.9566	2.26	0.01	0.012	0.0234607	0.0234607	65.1	-0.0979	60.6633	2.309	-0.018	-0.018	0.0284607	0.0284607	68.6	-0.0979	53.741	53.741	0	1	1	R	Me
nn03	N/N	s	10.3771	9.8904	49.0918	2.263	-0.029	-0.029	0.003	0.003	80.7	-0.1176	76.7402	2.307	-0.043	-0.043	0.008	0.008	83.5	-0.1176	58.1644	58.1644	0	1	2	R	H
nn04	N/N	s	10.3046	9.79045	47.6412	2.267	-0.036	-0.036	0.00952733	0.0164307	82.1	-0.1081	74.5422	2.315	-0.012	-0.013	0.0155273	0.0204307	83.7	-0.1081	60.6452	60.6452	0	1	2	R	H/Me
nn05	N/N	s	12.8577	12.736	46.7054	2.268	0	0	0.023	0.023	83.5	-0.1033	75.2053	2.322	0	0	0.031	0.031	85	-0.1033	54.7728	54.7728	0	1	2	R	Me
nn06	N/N	s	18.3235	18.3085	38.4559	2.26667	0.004005	0.002863	0.029281	0.0294233	81.9057	-0.09878	67.7894	2.3217	-0.015426	-0.015901	0.036303	0.036364	84.1292	-0.4632	49.6858	49.6858	0	1	2	R	Me
nn07	N/N	s	5.40803	5.36333	44.1483	2.257	-0.041	-0.041	0.004	0.004	74.9	-0.094	80.4369	2.313	-0.092	-0.092	0.014	0.014	79.8	-0.094	56.7124	56.7124	0	1	2	Ar	Ar
nn08	N/N	s	4.79822	4.79279	44.1736	2.25769	-0.028024	-0.0279	0.0034545	0.00344	75.9315	-0.09619	79.7075	2.311	-0.087	-0.087	0.0116645	0.0116645	80.6	-0.09619	55.9197	55.9197	0	1	2	Ar	Ar
nn09	N/N	a	10.6227	10.5631	43.8003	2.26514	-0.000526	-0.041432	0.0178383	0.0022665	77.4426	-0.09465	73.5052	2.31315	0.008645	-0.083209	0.025604	0.0098985	81.2002	-0.41105	54.7329	57.9137	-3.18085	1	2	R/Ar	Me
nn10	N/N	a	9.79339	9.73178	39.1081	2.255	-0.02	-0.029	0.000255	0.002006	76.1	-0.0928	74.6468	2.307	-0.083	-0.105	0.011255	0.015006	79.8	-0.0928	55.9473	56.407	-0.459705	1	2	Ar/R	Ar/Me
nn11	N/N	a	9.57348	9.0935	39.0764	2.26	-0.039	-0.031	0.00094	0.0042105	76.4	-0.0864	70.8306	2.306	-0.082	-0.074	0.01194	0.0182105	79.6	-0.0864	56.4352	53.8445	2.59066	1	2	Ar	Ar
nn12	N/N	s	15.43	15.1365	46.6711	2.274	-0.023	-0.021	0.0288903	0.0288903	82.9	-0.099	76.1029	2.33	-0.006	-0.005	0.0378903	0.0378903	84.9	-0.099	52.866	52.866	0	1	2	Ar	Ar
nn13	N/N	a	9.78714	9.70744	43.2507	2.26194	-0.002684	-0.036142	0.0177843	0.0013295	77.3879	-0.09745	72.2401	2.31239	0.012984	-0.099675	0.027867	0.0101855	81.125	-0.41253	54.946	58.9112	-3.96523	1	2	R	Me
nn14	N/N	s	2.418	2.25389	45.5361	2.254	-0.014	-0.017	-0.0032025	-0.0032025	76.2	-0.0832	81.8466	2.303	-0.098	-0.098	0.0117975	0.0117975	79.5	-0.0832	57.6911	57.6911	0	1	2	R	Me
nn15	N/N	s	19.5829	19.5135	36.2774	2.268	-0.02	-0.02	0.031	0.031	80.6	-0.0904	65.8655	2.324	-0.012	-0.012	0.04	0.04	84.5	-0.0904	44.0668	44.0668	0	1	2	R	Me
nn16	N/N	s	12.3248	12.1623	35.9015	2.261	-0.02	-0.026	0.004	0.005	76.7769	-0.0756	64.4115	2.301	-0.07	-0.072	0.02	0.02	79.4244	-0.2328	55.6676	55.6676	0	1	2	Ar	Ph
nn17	N/N	s	4.77586	4.89572	45.9862	2.261	-0.049	-0.05	0.004	0.004	75.957	-0.0981	82.2453	2.313	-0.09	-0.09	0.012	0.012	80.1454	-0.3486	56.6478	56.6478	0	1	2	Ar	Ar
nn18	N/N	s	4.62777	4.63467	47.7075	2.266	-0.05	-0.05	0.004	0.003	75.7442	-0.1035	83.4884	2.317	-0.09	-0.09	0.012	0.011	80.0887	-0.3683	57.5495	57.5495	0	1	2	Ar	Ar
nn19	N/N	s	10.5213	10.3237	49.4212	2.267	-0.056	-0.06	0.005	0.005	76.979	-0.096	67.7285	2.317	-0.042	-0.046	0.017	0.017	79.7245	-0.35	57.5771	57.5771	0	1	2	Ar	Ar
nn20	N/N	s	19.5092	15.9957	42.6636	2.269	-0.068	-0.072	0.004	0.004	76.0885	-0.0911	60.6502	2.321	-0.057	-0.056	0.017	0.017	78.7522	-0.3538	52.6988	52.6988	0	1	2	Ar	Ar
nn21	N/N	s	12.5394	12.4967	38.6299	2.265	-0.052	-0.054	0.003	0.003	75.2485	-0.0983	74.5715	2.316	-0.093	-0.093	0.013	0.013	79.5177	-0.3545	53.3935	53.3935	0	1	2	Ar	Ar
nn22	N/N	s	18.8459	18.2027	30.2866	2.262	-0.003	-0.016	-0.001	-0.001	76.7224	-0.0932	59.0865	2.306	-0.076	-0.076	0.004	0.004	78.867	-0.3602	61.0535	61.0535	0	1	2	R	R
nn23	N/N	s	11.2482	10.4705	50.0343	2.27053	-0.043449	-0.044663	0.0123207	0.0136747	81.6949	-0.10944	79.8243	2.32106	-0.029326	0.060429	0.0182857	0.018294	83.9779	-0.50876	56.0839	56.0839	0	1	2	R	Me/H
nn24	N/N	s	8.70597	7.92059	51.7745	2.27183	-0.058113	-0.057686	0.0129617	0.014323	81.9951	-0.10573	78.8965	2.32063	-0.019279	0.093466	0.0187713	0.0199573	83.2999	-0.48844	55.9479	55.9479	0	1	2	R	Me/H
nn25	N/N	s	16.3631	16.6045	33.3787	2.26626	-0.025488	-0.026556	0.013543	0.014004	75.467	-0.05668	67.9822	2.31345	-0.091061	0.019935	0.023574	0.0235415	78.3055	-0.29702	50.7497	50.7497	0	1	2	Ar	Ar
nn26	N/N	a	11.9863	11.2565	37.0589	2.261	0.045	-0.055	0.0330297	0.0132723	80.2	-0.0845	61.0947	2.312	-0.006	-0.018	0.0500297	0.0192723	83.2	-0.4546	61.7247	40.9265	20.7982	1	2	R	R/H
nn27	N/N	s	10.6885	8.9459	49.8069	2.27	-0.056	-0.057	0.015115	0.013727	81.6	-0.1041	76.851	2.32	-0.024	-0.021	0.022115	0.020727	83.2	-0.4856	55.673	55.673	0	1	2	R	Me/H
nn28	N/N	s	13.1935	11.5312	45.6033	2.27	-0.055	-0.055	0.0107463	0.017927	81.6	-0.1055	72.7126	2.319	-0.026	-0.025	0.0167463	0.023927	83.4	-0.4924	58.5628	58.5628	0	1	2	R	Me/H
nn29	N/N	a	19.6228	19.8324	36.2334	2.264	0.166	-0.098	0.0327223	0.0105763	73.6	-0.0688	59.3337	2.312	0.016	-0.023	0.0427223	0.0155763	77.4	-0.4244	43.515	49.8565	-6.3415	1	2	R	R/H
nn30	N/N	s	8.73392	7.9244	51.7583	2.27	-0.048	-0.05	0.0137913	0.0136977	81.7	-0.1069	78.8859	2.321	-0.018	-0.016	0.0187913	0.0196977	83.3	-0.4884	57.6122	57.6122	0	1	2	R	Me/H
nn31	N/N	s	21.8122	21.0697	47.2212	2.282	-0.03	-0.037	0.024	0.024	96.3	-0.091	68.8329	2.34	0.048	0.048	0.031	0.031	97.6	-0.091	55.5484	55.5484	0	1	3	R	Me
nn32	N/N	s	11.5756	11.5799	44.9282	2.274	-0.084	-0.083	0.016	0.017	86.1412	-0.093	72.7762	2.32	-0.073	-0.074	0.027	0.026	88.8736	-0.3821	57.8337	57.8337	0	1	3	R	R
nn33	N/N	s	15.7341	15.901	39.4859	2.28	-0.073	-0.072	0.021	0.02	85.1645	-0.0837	64.2753	2.321	-0.076	-0.083	0.028	0.03	88.3341	-0.3726	53.8413	53.8413	0	1	3	R	R
nn34	N/N	s	18.4869	18.4311	38.8709	2.273	-0.094	-0.091	0.014	0.015	86.4319	-0.0892	65.8717	2.323	-0.068	-0.07	0.025	0.025	89.0813	-0.3832	50.0622	50.0622	0	1	3	R	R
nn35	N/N	s	16.3327	16.3285	40.9754	2.26863	-0.104302	-0.100429	0.0163215	0.015725	85.3204	-0.09073	69.0127	2.32418	-0.08064	-0.082965	0.026726	0.0269985	88.32	-0.39161	53.9326	53.9326	0	1	3	R	R
nn36	N/N	s	21.9903	21.5567	34.4407	2.283	-0.082	-0.083	0.02	0.02	83.9482	-0.0817	58.9409	2.326	-0.082	-0.085	0.033	0.032	87.9418	-0.3756	47.5115	47.5115	0	1	3	R	R
nn37	N/N	s	24.2123	24.2581	33.9638	2.274	-0.105	-0.103	0.016	0.016	85.7914	-0.0891	61.0054	2.326	-0.077	-0.076	0.026	0.027	88.4052	-0.3909	44.9397	44.9397	0	1	3	R	R
nn38	N/N	s	37.2943	32.4292	43.7655	2.29133	-0.028327	-0.025782	0.02462	0.0259997	106.846	-0.09286	56.3234	2.3346	0.100621	0.095449	0.0315457	0.031712	99.6226	-0.43667	55.9145	55.9145	0	1	4	R	Me
nn39	N/N	s	32.9626	29.4548	47.1736	2.29335	-0.022138	-0.027826	0.0261967	0.025699	109.269	-0.09061	64.58	2.34097	0.100364	0.099389	0.0311743	0.0302673	103.099	-0.42657	56.9418	56.9418	0	1	4	R	Me
nn40	N/N	s	33.5304	30.2868	45.3495	2.29059	-0.043097	-0.04734	0.0264507	0.0265943	105.263	-0.08348	63.6673	2.34452	0.088586	0.088586	0.031737	0.0316813	102.11	-0.42849	53.1404	53.1404	0	1	4	R	Me
nn41	N/N	s	8.46248	7.46097	38.6124	2.256	-0.004	0	0.02	0.02	86.8164	-0.108	69.2051	2.318	-0.022	-0.022	0.023	0.023	91.2537	-0.4611	51.7576	51.7576	0	1	4	R	H
no_ch01	N/O	a	9.776	9.59089	101.474	2.34057	-0.000428	-0.00037	0.015947	0.055962	84.3873	-0.19771	123.985	2.37279	-0.000181	-5e-05	0.029322	0.06659	83.8913	-0.63756	103.5	104.773	-1.27288	1	2	R	Me
no_ch02	N/O	a	14.6308	14.3999	79.2633	2.32093	-0.09873	-0.148009	-0.003978	0.023457	92.6704	-0.16773	103.011	2.3601	-0.084335	-0.137938	0.002255	0.026816	93.3231	-0.53405	91.9873	79.0599	12.9273	1	3	R	Me
no_ch03	N/O	a	14.788	14.0552	82.228	2.32603	-0.188346	0.075175	0.004948	0.012582	92.4887	-0.16361	104.906	2.36626	-0.068581	0.003356	0.010889	0.015263	92.9264	-0.52322	90.9613	79.8579	11.1034	1	3	R	Me
no_ch04	N/O	a	14.371	13.5679	70.9443	2.31974	-0.158618	0.071769	0.0174875	0.018026	92.0005	-0.14657	90.1517	2.35238	-0.07333	0.04067	0.0269205	0.021409	92.5198	-0.50492	79.76	74.8728	4.88717	1	3	Ar	Ph
no_ch05	N/O	a	1.21882	0.972207	86.429	2.31937	-0.164384	0.052492	-0.000379	0.033462	90.5508	-0.15292	109.7	2.35545	-0.100783	0.009673	0.0066555	0.03711	92.3138	-0.50552	80.0981	78.4672	1.6309	1	3	R	Me
no_ch06	N/O	a	9.23227	9.94082	71.2064	2.31497	-0.128959	0.048751	0.0145385	0.02368	90.6283	-0.13616	89.9584	2.34437	-0.085902	0.012103	0.0251085	0.028019	91.9837	-0.46811	73.3442	70.6596	2.68459	1	3	Ar	Ph
no_ch07	N/O	a	13.369	12.6963	68.8037	2.31536	-0.117165	0.050913	0.0132075	0.025257	90.7021	-0.13622	87.2001	2.34538	-0.084644	0.011134	0.023043	0.028956	91.9588	-0.46698	73.113	69.8769	3.23607	1	3	Ar/R	Ph/H
no01	N/O	a	7.46667	7.27317	31.8437	2.24537	0.032692	0.056106	0.0243543	-0.001483	60.7947	-0.08821	46.1804	2.28286	-0.001682	0.030218	0.0310417	0.0032745	63.6206	-0.08821	53.4819	39.6068	13.875	1	1	R	Me
no02	N/O	a	8.10741	7.81154	39.5135	2.25426	0	0	0.021009	0.0158925	80.07	-0.09284	60.0443	2.29987	0	0	0.0270013	0.0228315	82.1368	-0.09284	56.2115	38.4324	17.7791	1	2	R	Me
no03	N/O	a	7.15179	6.83193	35.4025	2.24814	0.037321	0.037373	0.0199397	0.012442	75.9626	-0.08763	52.9313	2.28759	0.027888	-0.087803	0.0299343	0.023938	110.397	-0.08763	51.9299	41.3183	10.6115	1	2	R	Me
no04	N/O	a	3.656	3.62086	39.1086	2.25063	-0.040199	0.023563	-0.0037015	0.008992	74.7648	-0.09324	60.6467	2.29272	-0.100776	-0.002851	0.0039535	0.014272	78.2917	-0.31331	60.3398	40.9861	19.3536	1	2	R	Me
no05	N/O	a	9.80959	9.3057	33.6669	2.24958	0.003013	0.042522	0.03763	0.0095295	78.2889	-0.08955	53.8808	2.29683	-0.002915	-0.021658	0.043931	0.011058	81.3242	-0.36062	51.1359	37.4028	13.733	1	2	R	Me
no06	N/O	a	11.7087	6.63897	31.8233	2.25	0.003221	-0.002842	0.039	0.01	77	-0.086	52.4869	2.298	-0.000726	-0.038171	0.045	0.013	80.2	-0.086	49.4874	49.5454	-0.0579905	1	2	R	Me
no07	N/O	a	7.9951	7.54204	36.5533	2.25422	-0.048081	0.02305	0.0034775	0.0236975	74.5241	-0.08587	58.4368	2.29345	-0.089241	-0.004346	0.0106325	0.0265025	78.4546	-0.31921	57.8085	35.4987	22.3098	1	2	R/Ar	Me
no08	N/O	a	12.6242	11.9983	42.6523	2.27402	0.069427	-0.103939	0.016147	0.025988	82.0101	-0.07681	54.712	2.2932	0.042797	-0.02537	0.0265927	-0.026761	81.9626	-0.07681	52.9848	48.5178	4.46693	1	2	R	Me
no09	N/O	a	8.59181	-4.14373	36.2268	2.26971	-0.073169	0.089671	0.0054195	0.0254425	75.7873	-0.04486	57.0002	2.28917	-0.090922	-0.044014	0.0126255	0.01585	79.3321	-0.04486	54.0988	54.0883	0.0104804	1	2	Ar/R	Ar/H
no10	N/O	a	7.21485	6.45054	26.6823	2.25517	0.134935	0.257	0.0378463	0.005655	64	-0.06188	46.0037	2.289	-0.052	-0.036	0.0806777	0.016235	77.8	-0.3337	43.2524	43.5689	-0.316545	1	2	R	R/H
no11	N/O	a	5.24572	4.73493	29.9071	2.25497	0.1	-0.020259	0.0430257	0.01635	74.4	-0.06004	51.3232	2.29299	-0.046665	-0.032795	0.079878	0.026652	79.3	-0.33179	43.2524	35.7652	7.48721	1	2	R	R/H
no12	N/O	a	9.10056	8.92988	29.3594	2.24136	-0.028195	0.065648	0.012012	0.0033385	72.6	-0.07599	48.5256	2.28932	-0.03079	-0.027983	0.01609	0.015599	81.3236	-0.36185	50.3827	44.1508	20.7982	1	2	R	R/H
no13	N/O	a	9.10056	8.00806	34.0275	2.24872	0.008593	0.006066	0.00579367	0.016672	75.9	-0.08983	49.9441	2.28801	0.001272	-0.059419	0.0139307	0.022124	80.2935	-0.34518	50.3827	35.737	14.6456	1	2	R	R/H
no14	N/O	a	12.258	11.3867	42.6171	2.264	-0.037779	-0.027842	0.024	0.029	89.3	-0.0842	57.2974	2.302	0.024274	0.011829	0.03	0.032	84.9	-0.0842	55.3359	36.9734	18.3626	1	3	R	Me
no15	N/O	a	0.361248	0.19019	39.2684	2.25629	-0.041966	-0.120234	0.0064	0.027968	81.5791	-0.07995	68.7452	2.30146	-0.092291	-0.040173	0.014458	0.050456	84.5613	-0.3305	61.2712	50.793	10.4782	1	3	Ar	Ar
no16	N/O	a	10.6104	9.5951	45.7291	2.26888	-0.0008	-0.113188	0.009452	0.038591	82.2789	-0.09367	65.3326	2.31579	-0.060835	-0.029938	0.017628	0.053826	80.7646	-0.38262	59.223	48.7445	10.4785	1	3	Ar	Ar
no17	N/O	a	18.9839	17.6052	40.7333	2.27395	-0.034413	-0.039062	0.0256187	0.026225	92.3185	-0.0751	57.0796	2.306	0.033683	-0.013045	0.03118	0.032981	86.5009	-0.40138	55.864	37.2201	18.6439	1	4	R	Me
no18	N/O	a	15.3688	14.5129	40.7903	2.26875	-0.027702	0.012885	0.0266683	0.018042	94.7303	-0.09525	60.2093	2.3098	0.014366	0.006461	0.0301337	0.02339	89.1208	-0.39772	55.5038	40.6507	14.8531	1	4	R	Me
no19	N/O	a	17.2624	16.1706	37.2266	2.26757	0.008205	-0.032633	0.0253217	0.020022	91.889	-0.08639	56.964	2.30895	0.015555	-0.020079	0.0308627	0.022911	87.02	-0.3985	52.9212	37.4324	15.4888	1	4	R	Me
no20	N/O	a	18.3196	16.3065	31.098	2.2604	0.026866	-0.04322	0.035878	0.023838	95.9138	-0.0749	46.8769	2.31033	0.093785	-0.003013	0.0444297	0.032018	89.4206	-0.34559	45.1071	32.7244	12.3826	1	4	R	Me
oo_ch01	O/O	s	8.8351	8.7357	76.0994	2.307	0.007	0.018	0.014798	0.013042	92.5	-0.1625	92.7463	2.337	0.008	0.008	0.019798	0.018042	94	-0.4651	77.7329	77.7329	0	1	3	R	H
oo_ch02	O/O	s	9.40703	9.39262	77.8822	2.311	0	0	0.015843	0.010899	91.4	-0.161	93.7554	2.338	0	0	0.020843	0.014899	92.9	-0.4712	79.4938	79.4938	0	1	3	R	Me
oo_ch03	O/O	s	5.90555	5.90246	71.4448	2.301	0	0.006	0.013209	0.008722	90.9	-0.1492	88.275	2.334	-0.007	-0.007	0.021209	0.015722	92.8	-0.421	66.0095	66.0095	0	1	3	Ar	Ph
oo_ch04	O/O	a	10.8212	10.8516	74.0757	2.305	-0.015	0.014	0.015612	0.009921	89.9	-0.1598	90.3411	2.337	-0.003	-0.003	0.020612	0.015921	91.9	-0.4665	77.9579	77.1958	0.762118	1	3	R	R/H
oo_ch05	O/O	a	12.8945	12.8751	73.5985	2.311	-0.025	-0.006	0.012399	0.013042	88.3	-0.1571	89.8702	2.338	-0.014	-0.015	0.017399	0.018042	90.5	-0.4725	77.9526	77.3579	0.594685	1	3	R	R/Me
oo_ch06	O/O	a	9.59596	9.63186	71.7565	2.304	-0.022	-0.004	0.013265	0.007237	87	-0.1506	87.8148	2.338	-0.017	-0.02	0.018265	0.016237	90.2	-0.4526	74.7998	70.8785	3.9213	1	3	Ar/R	Ph/R
oo_ch07	O/O	a	3.36027	2.68197	95.4648	2.318	0.178	-0.076	0.006459	0.059788	81.1	-0.1995	105.807	2.336	0.045	-0.001	0.021459	0.077788	82.2	-0.4854	100.009	100.448	-0.439684	1	3	R	Me/H
oo_ch08	O/O	a	2.26867	1.99781	76.5428	2.30134	-0.053997	0.036376	0.032261	0.033341	84.5815	-0.15052	91.2291	2.33721	-0.102394	0.023663	0.037039	0.01662	86.92	-0.45924	77.881	69.0133	8.86767	1	3	0	0
oo01	O/O	s	6.62044	6.16236	23.1497	2.22884	0.049455	0.078372	0.022298	0.0125195	59.5164	-0.07622	29.8122	2.26093	0.031224	0.087958	0.026226	0.0172615	61.0611	-0.23915	36.889	36.889	0	1	1	R	Me
oo02	O/O	s	3.87297	3.78449	33.0043	2.23864	-1.7e-05	-0.000175	0.023453	0.0222645	77.3616	-0.08057	45.4836	2.27805	0.00024	0.000198	0.0268205	0.026828	79.6182	-0.28962	36.2944	36.2944	0	1	2	R	Me
oo03	O/O	s	3.30857	3.22135	28.2779	2.23519	0.012989	0.008434	0.0204165	0.017117	76.0372	-0.07596	40.4549	2.2732	0.00358	0.005489	0.0216535	0.018628	77.9105	-0.24732	33.9064	33.9064	0	1	2	R	Me
oo04	O/O	a	4.23324	4.04333	31.4213	2.241	0.003221	-0.002842	0.013374	0.011891	73.6	-0.0832	42.0065	2.27251	-0.000726	-0.038171	0.020947	0.005868	76.6674	-0.23657	42.8372	34.9121	7.92506	1	2	R	Me
oo05	O/O	a	4.77521	3.70781	35.4351	2.26935	-0.168032	0.171	0.021616	0.0112685	81.5	-0.02999	42.1294	2.2821	-0.014291	-0.010301	0.021752	0.244931	85.8201	-0.28987	47.7462	41.1286	6.61759	1	2	Ar/H	Ph/H
oo06	O/O	s	9.14069	9.15199	33.8959	2.25021	-0.056624	-0.052995	0.0266985	0.027411	86.8598	-0.07636	43.5651	2.28262	-0.006979	-0.00432	0.0304085	0.030392	81.4989	-0.31194	39.4485	39.4485	0	1	3	R	Me
oo07	O/O	s	8.9361	8.63176	33.2327	2.25157	-0.039097	-0.022247	0.0257075	0.031305	91.7654	-0.07213	45.2582	2.28508	-0.006316	0.013061	0.0323115	0.030721	86.7354	-0.3032	37.1719	37.1719	0	1	4	R	Me
oo08	O/O	s	7.50193	8.44947	41.487	2.26533	-0.068252	-0.076126	0.033646	0.034515	85.6552	-0.09692	49.6904	2.29037	-0.034374	-0.032262	0.041259	0.042012	85.2541	-0.35066	49.484	49.484	0	1	4	0	0
oo09	O/O	s	10.3714	15.0156	36.0853	2.26282	-0.051819	-0.072668	0.028499	0.03323	88.8539	-0.08682	45.5359	2.29449	-0.032739	-0.040486	0.046342	0.045216	88.4311	-0.33795	42.7117	42.7117	0	1	4	0	0
oo10	O/O	s	3.38498	3.3705	41.2983	2.25942	-0.079788	-0.083719	0.036257	0.03592	81.1356	-0.08574	48.2708	2.28438	-0.03932	-0.037079	0.046496	0.04662	82.1101	-0.30345	47.245	47.245	0	1	4	0	0
oo11	O/O	s	5.20041	5.30979	45.4244	2.27193	-0.099446	-0.100836	0.037254	0.037917	84.1678	-0.09083	55.219	2.2999	-0.053014	-0.051399	0.051249	0.050706	82.577	-0.35272	46.9704	46.9704	0	1	4	0	0
pn01	P/N	a	9.48294	9.01984	35.1402	2.25881	0.106188	0.011102	-0.0176697	0.023523	66.577	-0.10148	71.8891	2.3358	-0.000534	-0.001305	-0.0269217	0.034962	72.8613	-0.626	71.8591	56.7267	15.1324	1	1	R	Me
pn02	P/N	a	8.6043	10.4918	33.6274	2.258	0.091	0.016	-0.012	0.023	66.9	-0.0985	72.2052	2.341	0.014	-0.004	-0.02	0.033	72.4	-0.0985	70.6939	54.874	15.8199	1	1	Ar/R	Ph/Me
pn03	P/N	a	8.72164	8.24787	29.8015	2.248	0.17	-0.037	-0.007	0.003	63.6	-0.0894	64.0218	2.327	0.06	-0.097	-0.012	0.007	69.4	-0.0894	67.8591	57.7607	10.0983	1	1	Ar/R	Ph/Me
pn04	P/N	a	8.77773	8.09061	28.6133	2.24554	0.201609	-0.024045	-0.000579	0.0022035	62.8964	-0.0918	62.5207	2.31968	0.05659	-0.091659	-0.0113037	0.00704	69.2857	-0.53235	69.3339	57.8197	11.5142	1	1	R	Me
pn05	P/N	a	14.5665	14.2571	40.0058	2.274	-0.000232	-0.000174	-0.0192393	0.020717	82.5268	-0.11313	84.906	2.35592	-0.000196	-0.000236	-0.0264403	0.0320047	86.7909	-0.66203	74.2925	52.3096	21.9829	1	2	R	Me
pn06	P/N	a	25.3933	13.6187	40.4208	2.278	0.005	-0.022	-0.013	0.022	81.3	-0.096	83.7972	2.355	0.035	-0.002	-0.019	0.033	86.3	-0.096	72.3985	53.7545	18.644	1	2	Ar/R	Ph/Me
pn07	P/N	a	18.2248	17.9148	31.7346	2.2682	-0.010566	0.038162	-0.0164913	0.0452317	80.9946	-0.11168	77.7614	2.35507	-0.009127	-0.001981	-0.0224257	0.0568053	85.8933	-0.65535	72.8819	44.9226	27.9593	1	2	R	Me
pn08	P/N	a	19.4602	17.1447	32.218	2.27	0.005	0.04	-0.013	0.044	79.4	-0.1039	75.8284	2.354	0.006	-0.002	-0.014	0.058	85.9	-0.1039	72.5644	44.1323	28.4321	1	2	Ar/R	Ph/Me
pn09	P/N	a	9.65338	8.65502	37.743	2.26673	0.022726	-0.043388	-0.0167773	0.005723	78.4812	-0.10389	83.5813	2.34914	-0.001564	-0.095123	-0.0235703	0.0155085	84.9	-0.61541	72.3481	55.2184	17.1298	1	2	R	Me
pn10	P/N	a	13.4982	10.5609	37.2613	2.266	0.033	-0.054	-0.018	0.004	78.8	-0.0988	82.6143	2.346	0.025	-0.094	-0.022	0.012	84.2	-0.0988	69.949	59.3927	10.5563	1	2	Ar/R	Ph/Me
pn11	P/N	a	20.4705	12.3894	33.5383	2.266	0.01	-0.007	-0.021	0.009	78.4	-0.0875	73.8229	2.344	0.035	-0.073	-0.021	0.019	83.7	-0.0875	70.4206	55.9634	14.4571	1	2	Ar	Ph
pn12	P/N	a	9.93105	9.15733	37.6427	2.26855	0.062343	-0.078647	-0.019428	0.0038065	77.9549	-0.09625	82.0983	2.34741	0.006814	-0.121911	-0.0242647	0.0067085	84.0606	-0.61725	71.972	59.7688	12.2032	1	2	R/Ar	Me
pn13	P/N	a	10.4473	8.49637	40.2269	2.27	0.07	-0.092	-0.018	0.005	77.8	-0.0883	82.384	2.347	0.038	-0.127	-0.015	0.007	84	-0.0883	72.1536	60.787	11.3666	1	2	Ar/R	Ph/R
pn14	P/N	a	12.2583	12.2269	37.4645	2.26752	-0.034937	0.037588	-0.024569	0.0305957	79.1462	-0.1041	83.8895	2.35849	-0.018437	0.007293	-0.034361	0.046541	86.5167	-0.65389	71.5574	49.2356	22.3218	1	2	R	Me
pn15	P/N	a	13.249	12.8814	37.3643	2.269	-0.032	0.042	-0.0194397	0.0217947	78.6	-0.0971	79.9035	2.357	-0.002	0.012	-0.0224397	0.0377947	85.8	-0.0971	70.3572	45.4949	24.8623	1	2	Ar/R	Ph/Me
pn16	P/N	a	11.4632	10.3362	42.3297	2.271	0.023	-0.046	-0.013	0.004	81.9	-0.1102	87.9111	2.35	0.029	-0.072	-0.014	0.008	85.553	-0.6415	71.6634	59.4866	12.1768	1	2	Ar/R	Ph/H
pn17	P/N	a	12.1271	11.595	41.9162	2.278	0.015	-0.031	-0.012	0.013	81.7	-0.1073	88.4138	2.354	0.025	-0.061	-0.014	0.018	86.1359	-0.648	72.0412	57.9486	14.0926	1	2	Ar/R	Ph/HMe
pn18	P/N	a	9.95156	9.16655	34.698	2.263	0.01	0.014	-0.02	0.02	75.4	-0.1069	78.3924	2.348	0.011	-0.069	-0.017	0.028	85.3194	-0.6387	70.5703	51.3208	19.2495	1	2	Ar/R	Ph/H
pn19	P/N	a	10.8532	9.65278	38.2771	2.27128	0.038616	-0.052304	-0.020697	0.004061	77.7063	-0.09565	83.1768	2.35011	-0.004597	-0.069979	-0.031843	0.013347	84.5078	-0.61225	72.8784	57.7058	15.1726	1	2	R/Ar	Me
pn20	P/N	a	10.5659	8.37777	39.7155	2.26966	0.031957	-0.051835	-0.0167573	0.0043755	77.2967	-0.09271	83.4464	2.346	0.012	-0.066	-0.024	0.013	84.1162	-0.5938	71.2361	57.7296	13.5065	1	2	Ar	Ph/Ar
pn21	P/N	a	18.2951	15.3629	37.4216	2.27947	-0.057208	-0.024777	-0.0161147	0.007723	91.3814	-0.10156	81.4502	2.35508	0.03628	-0.073852	-0.0174227	0.013261	94.3479	-0.58869	72.0438	56.6722	15.3716	1	3	Ar	Ph/Ar
pn22	P/N	a	20.0864	17.1296	43.3502	2.2853	-0.032705	-0.036696	-0.0253167	0.02301	93.7753	-0.11703	85.3589	2.36705	0.032895	0.015237	-0.0298567	0.031963	98.1086	-0.63764	73.7625	72.7723	0.99021	1	3	R	Me
pn23	P/N	a	25.9851	19.7633	42.3598	2.287	-0.025	-0.042	-0.018	0.025	92.6	-0.1047	79.1178	2.365	0.044	0.036	-0.02	0.034	96.8	-0.1047	72.1118	54.4873	17.6245	1	3	Ar/R	Ph/Me
pn24	P/N	a	23.4932	22.1786	37.5123	2.295	0.002	-0.076	-0.013	0.02	90.7	-0.0774	72.9463	2.348	0.05	-0.09	-0.012	0.019	87	-0.0774	72.4324	56.6663	15.7661	1	3	Ar/R	Ph/R
pn25	P/N	a	16.8064	10.3459	41.6714	2.27991	-0.018905	-0.078875	-0.0136767	0.00856833	86.9627	-0.10473	87.9741	2.35574	0.021783	-0.082143	-0.0130157	0.00863333	90.774	-0.64923	68.9971	60.9536	8.0435	1	3	Ar/R	Ph/H
pn26	P/N	a	14.0026	13.0428	37.4517	2.27482	0.013345	-0.04108	-0.0155127	0.0089435	81.0555	-0.08588	78.3153	2.34397	0.046565	-0.069843	-0.019679	0.013513	85.5528	-0.5667	68.0317	58.4118	9.61991	1	3	Ar	Ph/Ar
pn27	P/N	a	31.718	27.2068	39.8004	2.30117	0.013593	-0.027105	-0.0155907	0.0263723	107.878	-0.10584	76.1727	2.36192	0.082843	0.036843	-0.013114	0.0317543	103.222	-0.57745	72.2765	53.3439	18.9326	1	4	Ar/R	Ph
pn28	P/N	a	27.0871	24.3524	40.9081	2.29418	0.055657	-0.012448	-0.00807367	0.02659	108.907	-0.11117	78.4468	2.36209	0.080673	0.036493	-0.00786967	0.0322943	103.149	-0.56711	72.3893	55.6254	16.7639	1	4	Ar/R	Ph
pn29	P/N	a	25.7727	23.498	39.8965	2.29254	0.018264	-0.014525	-0.0114463	0.0286283	101.216	-0.11023	78.7232	2.36374	0.068294	0.034176	-0.00986067	0.0346597	102.13	-0.57279	71.0086	52.3653	18.6433	1	4	Ar/R	Ph
pn30	P/N	a	28.7626	25.1469	35.4482	2.28898	-0.007964	0.018586	-0.018332	0.0366223	97.9568	-0.09738	67.8988	2.34688	0.100205	0.042822	-0.012395	0.0496993	95.946	-0.55839	67.4156	43.1781	24.2376	1	4	Ar/R	Ph
po_ch01	P/O	a	10.2079	4.62683	88.3801	2.333	0	0	-0.0293817	0.036589	83.1473	-0.18604	128.202	2.40288	0	0	-0.038434	0.049672	84.556	-0.80021	102.37	100.251	2.1191	1	2	R	Me
po01	P/O	a	5.98216	5.08043	28.0789	2.24816	0.076514	0.00912	-0.0176997	0.0247375	63.7518	-0.1005	56.5316	2.30894	0.012027	0.028717	-0.020548	0.029969	69.3021	-0.5074	71.2415	37.0002	34.2413	1	1	R	Me
po02	P/O	a	7.30265	6.32816	28.6002	2.254	0.054	-0.002	-0.0246217	0.0232965	64.2	-0.09453	57.0411	2.311	0.022	0.004	-0.0256217	0.0302965	69.6	-0.09453	71.8188	36.5755	35.2433	1	1	Ar/R	Ph/Me
po03	P/O	a	7.99501	6.92009	33.9859	2.25615	0.000122	1.6e-05	-0.0243207	0.021262	79.4082	-0.11602	70.7099	2.33097	0.000231	0.000263	-0.0287013	0.0298325	83.6678	-0.56543	72.3863	72.5105	-0.124247	1	2	R	Me
po04	P/O	a	8.74232	7.91009	33.3525	2.266	0.005	-0.036	-0.011185	0.024739	78.9	-0.09867	68.4702	2.327	0.03	0.003	-0.016185	0.027739	83.5	-0.09867	71.3673	37.7552	33.6121	1	2	Ar/R	Ph/Me
po05	P/O	a	7.77132	6.34185	29.637	2.25378	0.066232	-0.01134	-0.0159853	0.013448	76.9881	-0.08691	63.6989	2.3197	0.009213	-0.096876	-0.0194247	0.020997	84.3185	-0.49632	70.0767	42.0754	28.0014	1	2	R	Me
po06	P/O	a	9.14999	8.05629	29.278	2.25	0.051	-0.015	-0.0164887	0.013563	76.7	-0.0841	63.4049	2.318	0.038	-0.108	-0.0124887	0.022563	84.5	-0.0841	69.5436	40.9731	28.5705	1	2	Ar	Ph
po07	P/O	a	7.93952	7.10368	30.9163	2.25592	-0.009747	0.087	-0.0212567	0.017713	76.3	-0.10949	66.1953	2.3263	0.026667	-0.005023	-0.0228087	0.022627	82.8534	-0.5291	71.6022	30.8617	40.7404	1	2	Ar/R	Me
po08	P/O	a	8.13535	6.86465	30.0236	2.25116	-0.012069	0.064321	-0.0221303	0.011979	73.9035	-0.11507	67.1129	2.32565	0.000365	0.01498	-0.0281783	0.019667	82.2146	-0.54071	72.0815	72.0815	0	1	2	R	Me
po09	P/O	a	6.21229	4.82065	32.0705	2.256	-0.034	0.084	-0.0184727	0.0168025	73.2	-0.10409	66.3253	2.324	0.017	0.042	-0.0174727	0.0218025	80.9	-0.10409	70.7295	72.6601	-1.93059	1	2	Ar/R	Ph/Me
po10	P/O	a	8.16687	10.5043	37.792	2.28	0.102	-0.179	0.109784	0.029146	80.5	-0.07871	67.2621	2.326	0.021	-0.056	0.107784	0.034146	84.5	-0.07871	72.2013	46.8682	25.333	1	2	R	Me
po11	P/O	a	12.758	11.1785	36.9476	2.27119	-0.031918	-0.050159	-0.0262927	0.027801	87.3065	-0.11949	69.4613	2.32587	0.02839	-0.008388	-0.0304277	0.031877	85.7824	-0.56872	74.3289	39.1037	35.2252	1	3	R	Me
po12	P/O	a	12.2281	10.7055	35.8626	2.269	-0.028	-0.051	-0.0221327	0.030307	87	-0.1075	65.6539	2.323	0.042	-0.002	-0.0231327	0.033307	86	-0.1075	70.8746	39.121	31.7535	1	3	Ar/R	Ph/Me
po13	P/O	a	19.4792	16.9459	35.2513	2.27891	0.001574	-0.053817	-0.0172017	0.0239515	89.8227	-0.09827	67.3004	2.32928	0.052916	-0.035773	-0.0151523	0.029265	84.3671	-0.56434	72.3354	37.5544	34.781	1	4	Ar/R	Me
po14	P/O	a	15.5465	12.1384	35.2815	2.27855	0.063076	-0.077793	-0.0114003	0.0283785	96.8574	-0.09571	65.8181	2.33096	0.060813	-0.006368	-0.0135607	0.0284875	97.9659	-0.49561	70.8407	38.022	32.8187	1	4	Ar/R	Me
po15	P/O	a	12.613	11.1616	35.4831	2.27251	0.037082	-0.065397	-0.013452	0.022173	87.0672	-0.0934	70.2782	2.3329	0.039805	-0.04975	-0.017157	0.025332	85.2741	-0.56245	71.8559	40.2576	31.5982	1	4	Ar/R	Me
po16	P/O	a	16.4498	15.0794	30.5077	2.27033	0.041353	-0.088884	-0.011987	0.028028	85.583	-0.08926	63.0611	2.33236	0.067955	-0.038756	-0.0114613	0.0352065	89.0078	-0.52428	68.5713	31.7842	36.7871	1	4	Ar/R	Me
pp01	P/P	s	12.7201	12.402	27.7834	2.258	0.047	0.05	-0.014	-0.014	68.3	-0.1205	82.0947	2.37	0.006	0.006	-0.017	-0.017	75.4	-0.1205	72.7697	72.7697	0	1	1	R	Me
pp02	P/P	s	11.1903	11.103	29.8498	2.269	0.046	0.024	-0.008	-0.009	69.5	-0.1107	86.1334	2.379	0.023	0.025	-0.015	-0.014	74.4	-0.1107	69.8035	69.8035	0	1	1	Ar	Ph
pp03	P/P	s	8.81829	8.71286	30.5137	2.262	0.062	0.037	-0.016	-0.018	66.3	-0.1084	83.0278	2.368	0.02	0.018	-0.023	-0.021	73.1	-0.1084	69.3849	69.3849	0	1	1	Ar	Ph
pp04	P/P	s	15.9863	14.784	34.7664	2.268	0	0	-0.018	-0.018	82	-0.132	99.9863	2.388	0	0	-0.022	-0.023	88.3	-0.132	72.8613	72.8613	0	1	2	R	Me
pp05	P/P	s	17.2401	15.9549	34.7827	2.276	0.011	0	-0.014	-0.014	82.5	-0.1067	94.4153	2.383	0.031	0.034	-0.015	-0.015	87.4	-0.1067	71.718	71.718	0	1	2	Ar	Ph
pp06	P/P	s	16.3503	14.8097	27.3755	2.261	-0.002	0.016	-0.017	-0.02	78.9	-0.0675	81.338	2.365	0.006	0.009	-0.017	-0.019	88	-0.0675	66.6075	66.6075	0	1	2	R	R
pp07	P/P	s	12.146	12.6097	24.9791	2.255	0.015	0.114	-0.035	-0.022	77.6	-0.1178	82.0822	2.371	0.008	0.016	-0.047	-0.036	86.4	-0.1178	66.4407	66.4407	0	1	2	OAr	OPh
pp08	P/P	s	12.968	12.183	35.087	2.274	0.002	-0.003	-0.018	-0.019	79.8	-0.1006	95.7123	2.381	0.01	0.011	-0.018	-0.018	87.9	-0.1006	68.7518	68.7518	0	1	2	Ar	Ph
pp09	P/P	s	14.3548	13.6457	36.1695	2.277	-0.01	-0.01	-0.016	-0.017	77.5	-0.0956	95.6634	2.376	0.015	0.018	-0.017	-0.018	86.3	-0.0956	68.5391	68.5391	0	1	2	Ar	Ph
pp10	P/P	s	14.8668	12.9002	38.5145	2.275	-0.032	-0.019	-0.022	-0.019	81.1	-0.1079	107.452	2.392	0.002	0.003	-0.029	-0.028	88.4	-0.1079	71.4723	71.4723	0	1	2	R	R
pp11	P/P	s	15.9888	13.7549	30.0676	2.273	0.019	0.014	-0.006	-0.006	84.1	-0.0915	89.7541	2.372	0.026	0.027	-0.008	-0.008	90.7	-0.0915	68.337	68.337	0	1	2	Ar	Ph
pp12	P/P	s	21.1871	15.82	37.7684	2.282	-0.068	-0.066	-0.021	-0.02	92.6	-0.1407	102.136	2.389	0.016	0.017	-0.026	-0.025	97.6	-0.1407	72.9894	72.9894	0	1	3	R	Me
pp13	P/P	s	22.9843	17.6084	38.6105	2.295	-0.035	-0.045	-0.015	-0.014	90.9	-0.1141	94.0613	2.379	0.038	0.039	-0.017	-0.016	94.9	-0.1141	71.6383	71.6383	0	1	3	Ar	Ph
pp14	P/P	s	17.6561	14.8719	35.0556	2.278	-0.062	-0.062	-0.019	-0.002	81	-0.0779	94.4341	2.377	0.012	0.013	-0.021	-0.005	90.8	-0.0779	68.1387	68.1387	0	1	3	Ar	Ph
pp15	P/P	a	24.3346	23.2292	39.9345	2.3	-0.041	-0.087	-0.016	-0.017	89.1	-0.1172	95.8265	2.385	0.036	0.067	-0.016	-0.02	93.3	-0.1172	73.7353	65.5103	8.22498	1	3	Ar	Ph
pp16	P/P	s	29.0517	23.3432	36.2385	2.294	0.014	-0.052	-0.011	-0.02	98.7	-0.1152	87.0182	2.37	0.081	0.063	-0.007	-0.013	100.8	-0.1152	69.8198	69.8198	0	1	3	Ar	Ph
pp17	P/P	s	27.3362	16.7601	39.7744	2.28932	-0.025659	-0.042542	-0.0194407	-0.024168	102.527	-0.15796	101.748	2.38706	0.038356	0.033129	-0.0220077	-0.0259307	102.149	-0.81292	73.207	73.207	0	1	4	R	Me
pp18	P/P	s	26.1683	22.5639	33.8295	2.288	-0.03	-0.028	-0.018	-0.011	93.4	-0.1147	86.6806	2.375	0.067	0.054	-0.014	-0.008	94.4	-0.1147	71.4589	71.4589	0	1	4	Ar	Ph
pp19	P/P	s	29.4018	19.4772	38.815	2.303	-0.021	-0.042	-0.01	-0.014	103.9	-0.1186	90.29	2.378	0.058	0.057	-0.012	-0.014	103.5	-0.1186	71.4432	71.4432	0	1	4	Ar	Ph
pp20	P/P	s	23.7505	19.0297	36.5861	2.293	-0.016	-0.002	-0.011	-0.008	96.5	-0.1118	92.6137	2.379	0.049	0.052	-0.011	-0.01	100.9	-0.1118	70.938	70.938	0	1	4	Ar	Ph
pp21	P/P	s	26.6333	23.0182	34.125	2.295	-0.026	-0.021	-0.011	-0.009	94.5	-0.1055	86.4026	2.377	0.042	0.046	-0.009	-0.01	95.2	-0.1055	68.3941	68.3941	0	1	4	Ar	Ph
pp22	P/P	s	29.6252	26.5429	31.187	2.295	-0.032	-0.012	-0.01	-0.007	93.6	-0.1016	83.3636	2.379	0.043	0.045	-0.008	-0.008	95	-0.1016	66.4689	66.4689	0	1	4	Ar	Ph
pp23	P/P	s	16.1043	19.0279	32.6655	2.284	-0.016	-0.018	-0.02	-0.019	92	-0.1419	95.642	2.384	0.019	0.02	-0.021	-0.02	98.6	-0.1419	69.8687	69.8687	0	1	4	Ar	Ph
pp24	P/P	s	37.6633	27.0167	35.033	2.289	-0.03	-0.013	-0.021	-0.01	106.7	-0.1241	74.5138	2.375	0.073	0.122	-0.013	0.004	106.8	-0.1241	70.0514	70.0514	0	1	5	Ar	Ph
pp25	P/P	s	36.8372	25.4498	39.7676	2.297	-0.03	-0.043	-0.016	-0.017	107.8	-0.1245	76.6549	2.373	0.121	0.122	-0.005	-0.005	108.8	-0.1245	67.0606	67.0606	0	1	5	Ar	Ph
pp26	P/P	s	47.7609	27.818	36.0308	2.3	-0.033	-0.022	-0.011	-0.014	113.8	-0.1324	79.3318	2.371	0.04	0.09	-0.009	-0.004	94.2	-0.1324	64.7025	64.7025	0	1	6	Ar	Ph
pp27	P/P	s	31.5166	24.5173	19.6358	2.268	-0.041	0.002	-0.017	-0.017	94.5	-0.1364	81.6254	2.378	0.021	0.027	-0.018	-0.016	98.2	-0.1364	69.2337	69.2337	0	1	6	Ar	Ph
pp28	P/P	s	28.4537	24.6202	28.261	2.275	0.003	0.066	-0.021	-0.014	90.8	-0.1273	85.2511	2.375	0.024	0.041	-0.025	-0.018	94	-0.1273	71.0893	71.0893	0	1	6	Ar	Ph

## Sheet: basic stats
new no.	D1/D2	sym/asym	He8	nHe8	BE, Zn	mean Zn-Cl	dZn-D1	dZn-D2	dD1-R, Zn	dD2-R, Zn	D1-Zn-D2	Q, Zn	BE, Pd	mean Pd-Cl	dPd-D1	dPd-D2	dD1-R, Pd	dD2-R, Pd	D1-Pd-D2	Q, Pd	BE, Au, D1	BE, Au, D2	dE, Au	bidentate	bridge length	substituent	subs2	line	No.	D1/D2	sym/asym	bidentate	count	bridge length	substituent	subs2
cc01	C/C	s	19.2007	19.1016	66.1789	2.31654	0.036543	0.051044	-0.015648	-0.014554	88.6331	-0.12964	118.331	2.36327	0.02748	0.027765	-0.00712	-0.005898	88.703	-0.62746	90.0987	90.0987	0	1	3	N_Ar	Ar	105	dmle_cc001	C/C	s	1	104	3	N_Ar	Ar
cc02	C/C	s	30.6953	18.7808	74.531	2.3349	0.000507	-0.001385	-0.0153335	-0.015463	113.929	-0.15262	121.546	2.39492	0.014007	0.013114	-0.005728	-0.0056655	98.8978	-0.65792	91.4128	91.4128	0	1	6	N_R	R	106	dmle_cc007	C/C	s	1	105	6	N_R	R
N	2	average	24.948	18.9412	70.355	2.32572	0.018525	0.0248295	-0.0154907	-0.0150085	101.281	-0.14113	119.938	2.37909	0.0207435	0.0204395	-0.006424	-0.00578175	93.8004	-0.64269	90.7558	90.7558	0
reference	cn01	STD	8.12792	0.226814	5.90584	0.0129842	0.0254813	0.0370729	0.000222385	0.00064276	17.8867	0.0162493	2.27288	0.0223852	0.00952685	0.0103598	0.000984293	0.000164402	7.20881	0.0215385	0.929216	0.929216	0
		min	19.2007	18.7808	66.1789	2.31654	0.000507	-0.001385	-0.015648	-0.015463	88.6331	-0.15262	118.331	2.36327	0.014007	0.013114	-0.00712	-0.005898	88.703	-0.65792	90.0987	90.0987	0
		max	30.6953	19.1016	74.531	2.3349	0.036543	0.051044	-0.0153335	-0.014554	113.929	-0.12964	121.546	2.39492	0.02748	0.027765	-0.005728	-0.0056655	98.8978	-0.62746	91.4128	91.4128	0
mcc01	C/C	s	28.1556	24.6905	79.0817	2.35	0.025	0.027	-0.014	-0.013	109.8	-0.1267	130.129	2.381	0.013	0.014	-0.013	-0.013	94.9366	-0.7178	90.4416	90.4416	0	0	0	N_R	Me	171	dmle_mCL042	C/C	s	0	168	0	N_R	Me
mcc02	C/C	s	34.3353	32.284	75.5043	2.357	0.02	0.049	-0.011	-0.006	117.7	-0.1368	126.529	2.39	0.033	0.039	-0.007	-0.005	98.7337	-0.703	92.3474	92.3474	0	0	0	N_R	R	172	dmle_mCL057	C/C	s	0	169	0	N_R	R
mcc03	C/C	s	45.0052	49.7213	61.3652	2.345	0.054	0.048	-0.006	-0.006	126.6	-0.1628	100.964	2.38744	0.052382	0.053619	0.0015685	0.002005	111.583	-0.62364	90.4467	90.4467	0	0	0	N_Ar	Ar	173	dmle_mCL061	C/C	s	0	170	0	N_Ar	Ar
N	3	average	35.832	35.5653	71.9837	2.35067	0.033	0.0413333	-0.0103333	-0.00833333	118.033	-0.1421	119.208	2.38615	0.032794	0.0355397	-0.00614383	-0.00533167	101.751	-0.68148	91.0786	91.0786	0
reference	cn01	STD	8.52392	12.834	9.36825	0.00602771	0.0183576	0.0124231	0.00404145	0.00404145	8.40496	0.0186244	15.9016	0.00463744	0.0196918	0.0200349	0.00732189	0.007508	8.72366	0.0506346	1.09884	1.09884	0
		min	28.1556	24.6905	61.3652	2.345	0.02	0.027	-0.014	-0.013	109.8	-0.1628	100.964	2.381	0.013	0.014	-0.013	-0.013	94.9366	-0.7178	90.4416	90.4416	0
		max	45.0052	49.7213	79.0817	2.357	0.054	0.049	-0.006	-0.006	126.6	-0.1267	130.129	2.39	0.052382	0.053619	0.0015685	0.002005	111.583	-0.62364	92.3474	92.3474	0
cn01	C/N	a	5.59203	4.69469	56.0203	2.27	0	0	-0.01767	0.003008	74.3	-0.1213	104.783	2.337	0	0	-0.00467	0.014008	79.5771	-0.4505	90.2806			1	2	N_R/Ar	Me/Ar	107	dmle_cn001	C/N	a	1	106	2	N_R/Ar	Me/Ar
cn02	C/N	a	9.50179	4.52502	57.9083	2.2793	-0.075	0.279	-0.0292435	0.010169	67.9	-0.10769	105.329	2.332	0.005	0.001	-0.005836	0.0149	79.701	-0.4432	85.9661			1	2	N_R/Ar	Me/Ar	108	dmle_cn002.01	C/N	a	1	107	2	N_R/Ar	Me/Ar
cn03	C/N	a	7.56428	7.15828	55.7172	2.278	-0.024	0.021	-0.0161675	0.0041175	74.4	-0.1118	100.455	2.333	-0.009	-0.003	-0.0021675	0.0151175	79.69	-0.4608	89.7943			1	2	N_R/Ar	Me/Ar	119	dmle_cn013_n	C/N	a	1	118	2	N_R/Ar	Me/Ar
cn04	C/N	a	16.0425	15.7394	56.2099	2.289	-0.027	-0.035	-0.018294	0.0025915	84.7	-0.1146	98.5113	2.344	0.001	0.013	-0.013294	0.0095915	87.5304	-0.5332	92.1739	57.0647	35.1092	1	3	N_R/Ar	Me/Ar	109	dmle_cn003_n	C/N	a	1	108	3	N_R/Ar	Me/Ar
cn05	C/N	a	16.5244	18.368	58.6059	2.29393	-0.026147	-0.164147	-0.017465	0.0024495	85.6	-0.116	100.458	2.347	0.005	0.017	-0.012933	0.009911	87.5654	-0.5323	93.3279	56.618	36.7099	1	3	N_R/Ar	R/Ar	112	dmle_cn006	C/N	a	1	111	3	N_R/Ar	R/Ar
cn06	C/N	a	23.081	17.2138	57.095	2.29	-0.025	-0.032	-0.019007	0.0159447	90.3	-0.1311	89.7371	2.361	0.043	0.115	-0.002007	0.0249447	91.788	-0.5228	92.9661			1	3	N_R/R	Me	114	dmle_cn008	C/N	a	1	113	3	N_R/R	Me
cn07	C/N	a	22.5528	25.7945	57.595	2.294	-0.028	-0.036	-0.0184525	0.022428	91.1	-0.1292	90.1549	2.353	0.002	0.143	-0.0094525	0.033428	86.856	-0.5529	93.2395	53.7077	39.5318	1	3	N_R/R	Me/R	115	dmle_cn009	C/N	a	1	114	3	N_R/R	Me/R
cn08	C/N	a	11.8885	11.6657	56.8449	2.287	-0.005	-0.051	-0.0164005	0.004267	85.3	-0.1053	99.7493	2.342	-0.006	0.016	-0.0094005	0.010267	87.6553	-0.5131	87.0131	56.8368	30.1763	1	3	N_R/Ar	R/Ar	116	dmle_cn010	C/N	a	1	115	3	N_R/Ar	R/Ar
cn09	C/N	a	15.6098	14.496	67.73	2.30779	0.010422	-0.070623	-0.010342	0.002453	87.6412	-0.1189	110.057	2.357	0.036	-0.012	-0.004828	0.00832	87.5236	-0.569	100.779	59.7891	40.9895	1	3	N_R/Ar	R/Ar	117	dmle_cn011	C/N	a	1	116	3	N_R/Ar	R/Ar
cn10	C/N	a	19.5564	18.9547	62.1513	2.30469	-0.034743	-0.005833	-0.010856	-0.020545	86.1297	-0.12598	104.657	2.353	-0.007	0.014	-0.0120775	-0.0105	89.143	-0.5555	98.2803	53.7138	44.5665	1	3	aN_R/Ar	R/Ar	118	dmle_cn012	C/N	a	1	117	3	aN_R/Ar	R/Ar
cn11	C/N	a	17.1871	17.1475	55.7581	2.294	-0.016	-0.037	-0.0156805	0.0017985	85.9	-0.1125	96.3891	2.34	-0.002	0.015	-0.0116805	0.0087985	87.628	-0.5199	92.2655	56.7774	35.4881	1	3	N_Ar/Ar	Ar	120	dmle_cn014	C/N	a	1	119	3	N_Ar/Ar	Ar
cn12	C/N	a	13.9039	13.5707	50.3087	2.28256	0.018359	-0.045015	-0.0123235	0.004661	84.9239	-0.08368	91.6511	2.33125	-0.00875	0.018371	-0.0041985	0.010789	87.3739	-0.45689	82.819	55.2055	27.6136	1	3	N_Ar/Ar	Ar	138	dmle_cn040	C/N	a	1	137	3	N_Ar/Ar	Ar
cn13	C/N	a	19.2602	19.2615	43.8704	2.28859	0.060663	0.081993	-0.0132925	0.004757	83.3063	-0.05248	81.9945	2.33243	-0.002078	0.01748	-0.0047645	0.0156585	87.1391	-0.39905	80.4973	45.2037	35.2936	1	3	N_Ar/Ar	Ar	148	dmle_cn056	C/N	a	1	147	3	N_Ar/Ar	Ar
cn14	C/N	a	15.0229	14.691	45.5473	2.27826	0.013646	-0.001306	-0.016557	0.0037765	84.3819	-0.07716	88.2356	2.32792	-0.002054	0.013019	-0.009098	0.0130665	87.9927	-0.41838	82.2051	51.9209	30.2842	1	3	N_Ar/Ar	Ar	149	dmle_cn058	C/N	a	1	148	3	N_Ar/Ar	Ar
cn15	C/N	a	20.0168	20.5929	48.3399	2.28594	0.018329	-0.119671	-0.014807	0.009393	86.5939	-0.0851	89.366	2.33866	-0.008213	0.031265	-0.0060015	0.0127335	85.9526	-0.47258	86.1846	55.8571	30.3275	1	3	N_Ar/Ar	Ar	150	dmle_cn060	C/N	a	1	149	3	N_Ar/Ar	Ar
cn16	C/N	a	13.6989	13.244	51.5725	2.28411	0.022745	-0.050446	-0.014268	0.0043425	85.0212	-0.08746	92.9949	2.33493	-0.010141	0.020787	-0.004899	0.0104675	87.5529	-0.46088	82.5107	56.5431	25.9676	1	3	N_Ar/Ar	Ar	151	dmle_cn062	C/N	a	1	150	3	N_Ar/Ar	Ar
cn17	C/N	a	22.0024	21.0241	58.2276	2.306	0.004	-0.092	-0.0108675	0.003355	92.9	-0.1078	98.0302	2.346	0.014	-0.011	-0.0078675	0.008355	89.8706	-0.5646	91.534	59.2424	32.2916	1	4	N_R/Ar	Me/Ar	110	dmle_cn004	C/N	a	1	109	4	N_R/Ar	Me/Ar
cn18	C/N	a	24.4862	21.2332	59.896	2.308	-0.032	-0.085	-0.0211845	0.003813	103.3	-0.1343	101.527	2.354	0.017	-0.012	-0.0131845	0.007813	88.8149	-0.5694	89.5836	62.0321	27.5514	1	4	N_R/Ar	R/Ar	113	dmle_cn007	C/N	a	1	112	4	N_R/Ar	R/Ar
cn19	C/N	a	22.9579	20.867	58.5377	2.309	-0.017	-0.073	-0.017113	0.0051645	100.8	-0.1139	96.0079	2.346	0.018	0	-0.009113	0.0091645	89.7497	-0.5414	91.3528	60.955	30.3978	1	4	N_Ar/Ar	Ar	121	dmle_cn015	C/N	a	1	120	4	N_Ar/Ar	Ar
cn20	C/N	a	24.1076	22.6718	55.7919	2.30822	-0.010134	-0.083225	-0.0129445	0.0048785	99.4994	-0.10977	93.5798	2.3436	0.018623	0.003435	-0.004847	0.0083735	89.9136	-0.54125	90.5106	59.4972	31.0134	1	4	N_Ar/Ar	Ar	126	dmle_cn030	C/N	a	1	125	4	N_Ar/Ar	Ar
cn21	C/N	a	22.6825	22.2163	48.9099	2.29471	0.04353	-0.10817	-0.0095555	0.0053215	94.3297	-0.0878	87.3424	2.33678	0.014567	0.000147	4.15e-05	0.0087085	90.1174	-0.4816	83.0985	56.1112	26.9873	1	4	N_Ar/Ar	Ar	139	dmle_cn042	C/N	a	1	138	4	N_Ar/Ar	Ar
cn22	C/N	a	33.0295	22.439	43.4738	2.32054	0.063469	0.068972	-0.0108865	0.0085165	106.071	-0.06316	78.7568	2.33839	0.012753	0.025149	0.0013995	0.0140395	90.0552	-0.42643	83.9902	46.6565	37.3337	1	4	N_Ar/Ar	Ar	152	dmle_cn064	C/N	a	1	151	4	N_Ar/Ar	Ar
cn23	C/N	a	21.1678	19.8739	47.6763	2.28096	0.109174	0.071379	-0.0111675	0.009843	88.3756	-0.0772	87.0309	2.33314	0.002402	0.034483	-0.00518	0.0163355	90.4388	-0.44992	85.2407	53.7216	31.5192	1	4	N_Ar/Ar	Ar	153	dmle_cn066	C/N	a	1	152	4	N_Ar/Ar	Ar
cn24	C/N	a	31.8375	22.5485	50.0035	2.30519	0.017777	-0.026159	-0.0133745	0.011295	109.016	-0.0979	89.0901	2.3453	0.007796	0.009899	0.0013	0.011577	89.1439	-0.49574	86.3387	57.819	28.5197	1	4	N_Ar/Ar	Ar	154	dmle_cn068	C/N	a	1	153	4	N_Ar/Ar	Ar
cn25	C/N	a	22.7702	21.0264	50.1675	2.29284	-0.006316	-0.050604	-0.0150975	0.0073085	101.876	-0.09555	90.1576	2.33687	-0.003878	0.041693	-0.005095	0.013164	89.5761	-0.48198	85.8936	57.0689	28.8246	1	4	N_Ar/Ar	Ar	155	dmle_cn070	C/N	a	1	154	4	N_Ar/Ar	Ar
cn26	C/N	a	25.8329	24.7139	54.558	2.30044	-0.044833	0.032947	-0.0198345	0.008414	90.6575	-0.1066	93.9239	2.35491	-0.013013	0.050967	-0.019917	0.017176	90.8764	-0.54717	92.0535	50.0592	41.9943	1	4	N_R/Ar	R/Ar	134	nf_cn001n	C/N	a	1	133	4	N_R/Ar	R/Ar
cn27	C/N	a	24.7186	23.277	56.5776	2.30046	-0.041485	0.042513	-0.0195755	0.008764	89.9749	-0.10491	94.8391	2.34871	-0.009275	0.052106	-0.0178955	0.017009	91.1342	-0.54012	93.6359	49.8431	43.7928	1	4	N_R/Ar	R/Ar	135	nf_cn002	C/N	a	1	134	4	N_R/Ar	R/Ar
cn28	C/N	a	27.6595	25.6894	54.6854	2.29753	-0.03498	0.065409	-0.01822	0.0086315	90.7785	-0.1047	92.8574	2.34563	0.00047	0.052221	-0.014901	0.0291855	91.1666	-0.52067	93.6546	48.9916	44.663	1	4	N_Ar/Ar	Ar	136	nf_cn003	C/N	a	1	135	4	N_Ar/Ar	Ar
cn29	C/N	a	17.5475	23.3451	59.693	2.31	0.006	-0.108	-0.0109265	-0.0103265	118.6	-0.1314	100.216	2.35	0.002	0.002	-0.0129265	-0.0053265	90.1528	-0.5866	93.1287	59.8136	33.3151	1	5	N_R/Ar	Me/Ar	111	dmle_cn005	C/N	a	1	110	5	N_R/Ar	Me/Ar
cn30	C/N	a	42.6439	33.0279	52.6663	2.315	0.014	-0.052	-0.0097375	0.004314	112.5	-0.1256	91.2159	2.356	0.008	0.027	-0.0117375	0.012314	94.529	-0.5419	89.9958	59.6795	30.3162	1	5	N_Ar/Ar	Ar	122	dmle_cn016	C/N	a	1	121	5	N_Ar/Ar	Ar
cn31	C/N	a	20.8735	20.84	55.1323	2.2993	-0.023066	0.053851	-0.0166825	0.007457	87.0378	-0.10948	94.3363	2.34897	0.001515	0.029855	-0.0114295	0.012255	86.0647	-0.53536	92.5421	57.6965	34.8456	1	3	N_Ar/Ar	Ar	140	dmle_cn047	C/N	a	1	139	3	N_Ar/Ar	Ar
cn32	C/N	a	17.3002	17.2651	56.3005	2.29476	-0.015345	-0.045833	-0.0153555	0.001796	85.8466	-0.11439	96.9356	2.3409	-0.002385	0.016815	-0.0110885	0.0087195	87.6586	-0.52594	92.4542	57.6035	34.8506	1	3	N_Ar/Ar	Ar	141	dmle_cn048	C/N	a	1	140	3	N_Ar/Ar	Ar
cn33	C/N	a	21.0703	20.3706	46.6141	2.29929	0.006595	0.123	-0.014621	0.002927	81.7	-0.06779	85.4614	2.34024	0.00428	0.01072	-0.011813	0.0152895	87.1215	-0.45512	91.1383	47.2578	43.8805	1	3	N_Ar/Ar	Ar	142	dmle_cn049	C/N	a	1	141	3	N_Ar/Ar	Ar
cn34	C/N	a	17.2864	17.0109	53.4101	2.28932	-0.022254	-0.00691	-0.0157325	0.002299	84.6706	-0.10027	94.4233	2.33529	0.006222	0.004827	-0.0125815	0.013195	88.0742	-0.46543	89.0487	53.4413	35.6074	1	3	N_Ar/Ar	Ar	143	dmle_cn050	C/N	a	1	142	3	N_Ar/Ar	Ar
cn35	C/N	a	31.3	23.9675	57.1655	2.3191	-0.018966	-0.006141	-0.017544	0.0102285	107.905	-0.12163	96.1523	2.3554	0.014521	0.007426	-0.006846	0.011363	87.9079	-0.55464	92.2502	56.4194	35.8308	1	4	N_Ar/Ar	Ar	144	dmle_cn051	C/N	a	1	143	4	N_Ar/Ar	Ar
cn36	C/N	a	22.8708	20.7404	59.4334	2.30982	-0.016627	-0.070865	-0.0154385	0.003827	101.297	-0.11703	96.7883	2.34736	0.01854	-0.001549	-0.0075285	0.0070275	89.9888	-0.54663	92.3191	56.445	35.8741	1	4	N_Ar/Ar	Ar	145	dmle_cn052	C/N	a	1	144	4	N_Ar/Ar	Ar
cn37	C/N	a	32.9096	22.9542	48.9399	2.32979	0.025537	0.116	-0.01551	0.0075125	105.4	-0.09226	86.3382	2.34737	0.023165	0.016241	-0.0070905	0.0140145	89.7772	-0.47961	91.4777	45.5804	45.8973	1	4	N_Ar/Ar	Ar	146	dmle_cn053	C/N	a	1	145	4	N_Ar/Ar	Ar
cn38	C/N	a	23.9327	19.943	54.3963	2.29666	-0.038913	0.007757	-0.0181135	0.0035995	103.266	-0.12622	92.8746	2.34363	0.0103	0.017344	-0.014264	0.0155145	90.268	-0.50091	91.2477	56.0658	35.1819	1	4	N_Ar/Ar	Ar	147	dmle_cn054	C/N	a	1	146	4	N_Ar/Ar	Ar
N	38	average	20.9998	19.0569	54.3035	2.29721	-0.00390955	-0.0129507	-0.0155344	0.00511975	91.9289	-0.104998	94.2739	2.34365	0.00532545	0.0209921	-0.00841771	0.0122834	88.2387	-0.505616	89.8103	55.0364	34.7808
reference	cn01	STD	7.3848	5.71732	5.22817	0.0131812	0.0344925	0.0822062	0.00384471	0.00653943	11.1112	0.019987	6.65316	0.00836227	0.0124617	0.030792	0.00502346	0.00736573	3.08317	0.0482431	4.4507	4.46754	5.66415
		min	5.59203	4.52502	43.4738	2.27	-0.075	-0.164147	-0.0292435	-0.020545	67.9	-0.1343	78.7568	2.32792	-0.013013	-0.012	-0.019917	-0.0105	79.5771	-0.5866	80.4973	45.2037	25.9676
		max	42.6439	33.0279	67.73	2.32979	0.109174	0.279	-0.0095555	0.022428	118.6	-0.05248	110.057	2.361	0.043	0.143	0.0013995	0.033428	94.529	-0.39905	100.779	62.0321	45.8973
mcn01	C/N	a	18.3156	16.1062	65.6392	2.313	0.01	-0.084	-0.013	0.00409	104.6	-0.1115	102.973	2.348	0.009	0.016	-0.014	0.01109	93.3471	-0.5486	90.4416	104.741	-14.2991	0	0	N_R/Ar	Me/Ar	174	dmle_mcn001	C/N	a	0	171	0	N_R/Ar	Me/Ar
mcn02	C/N	a	20.8213	18.9118	62.7395	2.316	0.013	-0.074	-0.009	0.00409	106.5	-0.1164	102.041	2.356	0.018	0.033	-0.009	0.01109	92.6358	-0.5386	92.3474	104.741	-12.3933	0	0	N_R/Ar	R/Ar	175	dmle_mcn002	C/N	a	0	172	0	N_R/Ar	R/Ar
mcn03	C/N	a	25.0589	22.3373	63.847	2.325	0	-0.091	-0.014	0.00409	114.2	-0.12	97.1412	2.353	0.023	0.008	-0.004	0.00909	95.4368	-0.5284	90.4467	104.741	-14.2941	0	0	N_Ar/Ar	Ar	176	dmle_mcn003	C/N	a	0	173	0	N_Ar/Ar	Ar
N	3	average	21.3986	19.1184	64.0752	2.318	0.00766667	-0.083	-0.012	0.00409	108.433	-0.115967	100.718	2.35233	0.0166667	0.019	-0.009	0.0104233	93.8066	-0.538533	91.0786	104.741	-13.6622
reference	cn01	STD	3.40848	3.12072	1.46327	0.006245	0.00680686	0.008544	0.00264575	0	5.08363	0.00426654	3.13285	0.00404145	0.0070946	0.0127671	0.005	0.0011547	1.45591	0.0101002	1.09884	0	1.09884
		min	18.3156	16.1062	62.7395	2.313	0	-0.091	-0.014	0.00409	104.6	-0.12	97.1412	2.348	0.009	0.008	-0.014	0.00909	92.6358	-0.5486	90.4416	104.741	-14.2991
		max	25.0589	22.3373	65.6392	2.325	0.013	-0.074	-0.009	0.00409	114.2	-0.1115	102.973	2.356	0.023	0.033	-0.004	0.01109	95.4368	-0.5284	92.3474	104.741	-12.3933
co_ch01	C/O	a	19.0928	17.8849	81.638	2.34814	-0.000209	-0.000169	-0.0171	0.022465	98.5131	-0.16294	114.412	2.37947	-0.000443	-3.8e-05	-0.014872	0.026994	90.3504	-0.64487	106.99	79.4059	27.5841	1	4	N_R	Me	123	dmle_co003_ch	C/O	a	1	122	4	N_R	Me
co_ch02	C/O	a	19.0379	17.8801	80.0038	2.35546	0.014028	0.004998	-0.017828	0.024639	97.8351	-0.17825	114.74	2.38254	0.000616	-0.002278	-0.0148355	0.027276	89.8274	-0.63814	107.001	79.4245	27.5765	1	4	N_R	Me	127	dmle_co004_ch	C/O	a	1	126	4	N_R	Me
co_ch03	C/O	a	19.8614	18.4262	81.8173	2.34929	0.000329	0.005173	-0.0173945	0.022754	98.8294	-0.16197	115.063	2.38172	0.001852	-0.000597	-0.0159645	0.082037	90.4123	-0.64348	106.964	79.3063	27.6575	1	4	N_R	R	128	dmle_co005_ch	C/O	a	1	127	4	N_R	R
co_ch04	C/O	a	26.282	23.4275	79.5448	2.34845	0.032639	-0.001028	-0.009352	0.022692	98.3478	-0.14722	111.189	2.37781	0.020818	0.002961	-0.0070695	0.030417	86.4119	-0.63487	103.833	79.1896	24.6429	1	4	N_R	R	129	dmle_co006_ch	C/O	a	1	128	4	N_R	R
co_ch05	C/O	a	20.4389	19.3351	76.7377	2.33851	0.021176	0.007388	-0.013766	0.018313	96.5132	-0.15781	111.132	2.37515	0.001092	0.009058	-0.0128215	0.030616	87.7259	-0.62341	104.513	78.1452	26.3673	1	4	N_Ar	Ar	130	dmle_co008_ch_n	C/O	a	1	129	4	N_Ar	Ar
co_ch06	C/O	a	18.9953	17.793	81.3073	2.34647	0.001478	-0.002305	-0.0170345	0.023684	98.6295	-0.16287	114.827	2.38096	0.002753	-0.000535	-0.014113	0.027592	89.7518	-0.6371	106.785	75.2032	31.5819	1	4	N_R	Me	131	dmle_co009_ch	C/O	a	1	130	4	N_R	Me
co_ch07	C/O	a	17.7117	16.5225	75.9714	2.33309	0.007378	0.021778	-0.01773	0.023573	97.4288	-0.17166	111.019	2.37577	0.003036	0.005979	-0.014635	0.026494	89.8103	-0.61628	104.46	70.6503	33.8096	1	4	N_R	Me	132	dmle_co010_ch	C/O	a	1	131	4	N_R	Me
N	7	average	20.2028	18.7528	79.5743	2.34563	0.0109741	0.00511929	-0.0157436	0.0225886	98.0138	-0.163246	113.198	2.37906	0.00424629	0.00207857	-0.013473	0.035918	89.1843	-0.634021	105.792	77.3322	28.46
reference	co_ch01	STD	2.81017	2.22518	2.36311	0.00745074	0.0124114	0.00820114	0.0031434	0.00202925	0.819667	0.00986713	1.95943	0.00290626	0.00740683	0.00412621	0.00297798	0.0204034	1.51704	0.0105014	1.4438	3.31327	3.14922
		min	17.7117	16.5225	75.9714	2.33309	-0.000209	-0.002305	-0.017828	0.018313	96.5132	-0.17825	111.019	2.37515	-0.000443	-0.002278	-0.0159645	0.026494	86.4119	-0.64487	103.833	70.6503	24.6429
		max	26.282	23.4275	81.8173	2.35546	0.032639	0.021778	-0.009352	0.024639	98.8294	-0.14722	115.063	2.38254	0.020818	0.009058	-0.0070695	0.082037	90.4123	-0.61628	107.001	79.4245	33.8096
co01	C/O	a	7.29178	19.6161	52.0045	2.27947	0.004579	0.027153	-0.019181	0.012285	81.3641	-0.11606	83.6757	2.3277	0.000325	-0.06642	-0.0105055	0.021365	86.3252	-0.46579	91.5622	91.3749	0.187248	1	3	N_R	Me	133	dmle_co012	C/O	a	1	132	3	N_R	Me
co02	C/O	a	14.4983	13.499	52.7209	2.27777	-0.000179	0.000316	-0.019098	0.0314405	82.8499	-0.12051	85.0885	2.33255	0.000196	7.7e-05	-0.0121085	0.0377355	88.3192	-0.46594	91.3583	38.4817	52.8766	1	3	N_R/R	R/Me	137	nf_co001	C/O	a	1	136	3	N_R/R	R/Me
N	2	average	10.8951	16.5575	52.3627	2.27862	0.0022	0.0137345	-0.0191395	0.0218627	82.107	-0.118285	84.3821	2.33012	0.0002605	-0.0331715	-0.011307	0.0295503	87.3222	-0.465865	91.4602	64.9283	26.5319
reference	co02	STD	5.09581	4.32539	0.50654	0.00120244	0.00336441	0.0189766	5.86899e-05	0.013545	1.05062	0.00314663	0.998973	0.00342699	9.12168e-05	0.0470205	0.00113349	0.0115757	1.41001	0.000106066	0.144127	37.4011	37.257
		min	7.29178	13.499	52.0045	2.27777	-0.000179	0.000316	-0.019181	0.012285	81.3641	-0.12051	83.6757	2.3277	0.000196	-0.06642	-0.0121085	0.021365	86.3252	-0.46594	91.3583	38.4817	0.187248
		max	14.4983	19.6161	52.7209	2.27947	0.004579	0.027153	-0.019098	0.0314405	82.8499	-0.11606	85.0885	2.33255	0.000325	7.7e-05	-0.0105055	0.0377355	88.3192	-0.46579	91.5622	91.3749	52.8766
cp01	C/P	a	19.4717	12.9224	55.5294	2.30049	-0.000422	0.000257	-0.013967	-0.010876	88.7285	-0.12097	113.384	2.38175	0.000197	-0.00016	-0.00832	-0.0242773	92.4568	-0.75573	89.6269	73.8871	15.7398	1	3	N_R/R	Me	208	nf_cp001	C/P	a	1	208	3	N_R/R	Me
cp02	C/P	a	20.0003	13.6612	53.964	2.301	0	0.009	-0.0119545	-0.00382833	85.4	-0.1046	109.462	2.381	-0.001	0.019	-0.0079545	-0.0118283	91.6975	-0.7297	92.3576	72.6124	19.7452	1	3	N_R/Ar	Me/Ph	124	dmle_cp001	C/P	a	1	123	3	N_R/Ar	Me/Ph
cp03	C/P	a	20.0137	14.0712	56.4801	2.302	0.003	-0.031	-0.015155	-0.0141007	88.3	-0.1203	113.77	2.379	-0.004	0.015	-0.012155	-0.0211007	90.4678	-0.7528	92.6247	74.1182	18.5065	1	3	N_R/R	Me/R	125	dmle_cp002	C/P	a	1	124	3	N_R/R	Me/R
N	3	average	19.8286	13.5516	55.3245	2.30116	0.000859333	-0.00724767	-0.0136922	-0.00960167	87.4762	-0.11529	112.205	2.38058	-0.001601	0.01128	-0.0094765	-0.0190688	91.5407	-0.746077	91.5364	73.5392	17.9972
reference	cp01	STD	0.309111	0.582174	1.27051	0.000767917	0.00186584	0.0210295	0.00161785	0.00525339	1.81074	0.00926387	2.38368	0.00142074	0.00216208	0.0101072	0.00232684	0.00646845	1.00377	0.0142581	1.65907	0.810936	2.0507
		min	19.4717	12.9224	53.964	2.30049	-0.000422	-0.031	-0.015155	-0.0141007	85.4	-0.12097	109.462	2.379	-0.004	-0.00016	-0.012155	-0.0242773	90.4678	-0.75573	89.6269	72.6124	15.7398
		max	20.0137	14.0712	56.4801	2.302	0.003	0.009	-0.0119545	-0.00382833	88.7285	-0.1046	113.77	2.38175	0.000197	0.019	-0.0079545	-0.0118283	92.4568	-0.7297	92.6247	74.1182	19.7452
mnn01	N/N	s	12.9561	11.3632	51.5077	2.28341	-0.065013	-0.002943	0.004826	0.004813	101.877	-0.09034	74.6954	2.31571	0.000369	0.001462	0.0095295	0.0095855	91.4943	-0.39038	56.0711	56.0711	0	0	0	Ar	Ar	177	dmle_mNL003	N/N	s	0	175	0	Ar	Ar
N	1	average
reference	nn05	STD
		min
		max
nn_ch01	N/N	s	18.3861	18.3409	83.7817	2.33979	-0.146201	-0.148213	0.000849	0.0005725	92.7405	-0.17294	113.415	2.38171	-0.076225	-0.076458	0.0060245	0.006049	92.3397	-0.59617	92.5298	92.5298	0	1	3	R	Me	184	nf_nn007_ch	N/N	s	1	183	3	R	Me
nn_ch02	N/N	s	18.0936	16.1515	88.4313	2.34653	0	0	0.0075275	0.071063	93.7731	-0.16866	115.282	2.39379	-0.000301	-0.000301	0.012592	0.0140115	92.5048	-0.56425	93.946	93.946	0	1	3	R	Me	92	ldnn051_ch	N/N	s	1	92	3	R	Me
nn_ch03	N/N	s	15.9089	14.8825	68.8332	2.33296	0.028344	0.032254	0.0160935	0.017513	92.1081	-0.13764	90.5247	2.36052	-0.010484	-0.00854	0.023324	0.0241185	88.7144	-0.53854	77.785	77.785	0	1	3	Ar	Ph	93	ldnn053_ch	N/N	s	1	93	3	Ar	Ph
N	3	average	17.4629	16.4583	80.3487	2.33976	-0.0392857	-0.038653	0.00815667	0.0297162	92.8739	-0.159747	106.407	2.37868	-0.0290033	-0.028433	0.0139802	0.0147263	91.1863	-0.56632	88.0869	88.0869	0
reference	nn_ch02	STD	1.35369	1.7495	10.2401	0.00678731	0.0936697	0.0962425	0.0076417	0.0367956	0.840501	0.0192642	13.7864	0.0168428	0.0412109	0.0417944	0.00873289	0.00905593	2.14229	0.0288707	8.94982	8.94982	0
		min	15.9089	14.8825	68.8332	2.33296	-0.146201	-0.148213	0.000849	0.0005725	92.1081	-0.17294	90.5247	2.36052	-0.076225	-0.076458	0.0060245	0.006049	88.7144	-0.59617	77.785	77.785	0
		max	18.3861	18.3409	88.4313	2.34653	0.028344	0.032254	0.0160935	0.071063	93.7731	-0.13764	115.282	2.39379	-0.000301	-0.000301	0.023324	0.0241185	92.5048	-0.53854	93.946	93.946	0
nn01	N/N	s	8.39552	7.19722	39.0279	2.253	0.008	0.009	0.0156507	0.0155863	64.7	-0.1077	62.3949	2.302	-0.025	-0.025	0.0186507	0.0185863	68	-0.1077	58.6484	58.6484	0	1	1	R	H/Me	30	ldnn004b	N/N	s	1	30	1	R	H/Me
nn02	N/N	s	14.4295	14.2915	35.9566	2.26	0.01	0.012	0.0234607	0.0234607	65.1	-0.0979	60.6633	2.309	-0.018	-0.018	0.0284607	0.0284607	68.6	-0.0979	53.741	53.741	0	1	1	R	Me	31	ldnn005	N/N	s	1	31	1	R	Me
nn03	N/N	s	10.3771	9.8904	49.0918	2.263	-0.029	-0.029	0.003	0.003	80.7	-0.1176	76.7402	2.307	-0.043	-0.043	0.008	0.008	83.5	-0.1176	58.1644	58.1644	0	1	2	R	H	32	ldnn007	N/N	s	1	32	2	R	H
nn04	N/N	s	10.3046	9.79045	47.6412	2.267	-0.036	-0.036	0.00952733	0.0164307	82.1	-0.1081	74.5422	2.315	-0.012	-0.013	0.0155273	0.0204307	83.7	-0.1081	60.6452	60.6452	0	1	2	R	H/Me	33	ldnn008a	N/N	s	1	33	2	R	H/Me
nn05	N/N	s	12.8577	12.736	46.7054	2.268	0	0	0.023	0.023	83.5	-0.1033	75.2053	2.322	0	0	0.031	0.031	85	-0.1033	54.7728	54.7728	0	1	2	R	Me	34	ldnn009	N/N	s	1	34	2	R	Me
nn06	N/N	s	18.3235	18.3085	38.4559	2.26667	0.004005	0.002863	0.029281	0.0294233	81.9057	-0.09878	67.7894	2.3217	-0.015426	-0.015901	0.036303	0.036364	84.1292	-0.4632	49.6858	49.6858	0	1	2	R	Me	179	nf_nn002	N/N	s	1	177	2	R	Me
nn07	N/N	s	5.40803	5.36333	44.1483	2.257	-0.041	-0.041	0.004	0.004	74.9	-0.094	80.4369	2.313	-0.092	-0.092	0.014	0.014	79.8	-0.094	56.7124	56.7124	0	1	2	Ar	Ar	28	ldnn001	N/N	s	1	28	2	Ar	Ar
nn08	N/N	s	4.79822	4.79279	44.1736	2.25769	-0.028024	-0.0279	0.0034545	0.00344	75.9315	-0.09619	79.7075	2.311	-0.087	-0.087	0.0116645	0.0116645	80.6	-0.09619	55.9197	55.9197	0	1	2	Ar	Ar	29	ldnn002	N/N	s	1	29	2	Ar	Ar
nn09	N/N	a	10.6227	10.5631	43.8003	2.26514	-0.000526	-0.041432	0.0178383	0.0022665	77.4426	-0.09465	73.5052	2.31315	0.008645	-0.083209	0.025604	0.0098985	81.2002	-0.41105	54.7329	57.9137	-3.18085	1	2	R/Ar	Me	181	nf_nn004	N/N	a	1	179	2	R/Ar	Me
nn10	N/N	a	9.79339	9.73178	39.1081	2.255	-0.02	-0.029	0.000255	0.002006	76.1	-0.0928	74.6468	2.307	-0.083	-0.105	0.011255	0.015006	79.8	-0.0928	55.9473	56.407	-0.459705	1	2	Ar/R	Ar/Me	36	ldnn014	N/N	a	1	36	2	Ar/R	Ar/Me
nn11	N/N	a	9.57348	9.0935	39.0764	2.26	-0.039	-0.031	0.00094	0.0042105	76.4	-0.0864	70.8306	2.306	-0.082	-0.074	0.01194	0.0182105	79.6	-0.0864	56.4352	53.8445	2.59066	1	2	Ar	Ar	37	ldnn015	N/N	a	1	37	2	Ar	Ar
nn12	N/N	s	15.43	15.1365	46.6711	2.274	-0.023	-0.021	0.0288903	0.0288903	82.9	-0.099	76.1029	2.33	-0.006	-0.005	0.0378903	0.0378903	84.9	-0.099	52.866	52.866	0	1	2	Ar	Ar	38	ldnn016	N/N	s	1	38	2	Ar	Ar
nn13	N/N	a	9.78714	9.70744	43.2507	2.26194	-0.002684	-0.036142	0.0177843	0.0013295	77.3879	-0.09745	72.2401	2.31239	0.012984	-0.099675	0.027867	0.0101855	81.125	-0.41253	54.946	58.9112	-3.96523	1	2	R	Me	180	nf_nn003	N/N	a	1	178	2	R	Me
nn14	N/N	s	2.418	2.25389	45.5361	2.254	-0.014	-0.017	-0.0032025	-0.0032025	76.2	-0.0832	81.8466	2.303	-0.098	-0.098	0.0117975	0.0117975	79.5	-0.0832	57.6911	57.6911	0	1	2	R	Me	39	ldnn019	N/N	s	1	39	2	R	Me
nn15	N/N	s	19.5829	19.5135	36.2774	2.268	-0.02	-0.02	0.031	0.031	80.6	-0.0904	65.8655	2.324	-0.012	-0.012	0.04	0.04	84.5	-0.0904	44.0668	44.0668	0	1	2	R	Me	40	ldnn023	N/N	s	1	40	2	R	Me
nn16	N/N	s	12.3248	12.1623	35.9015	2.261	-0.02	-0.026	0.004	0.005	76.7769	-0.0756	64.4115	2.301	-0.07	-0.072	0.02	0.02	79.4244	-0.2328	55.6676	55.6676	0	1	2	Ar	Ph	77	ldnn025	N/N	s	1	77	2	Ar	Ph
nn17	N/N	s	4.77586	4.89572	45.9862	2.261	-0.049	-0.05	0.004	0.004	75.957	-0.0981	82.2453	2.313	-0.09	-0.09	0.012	0.012	80.1454	-0.3486	56.6478	56.6478	0	1	2	Ar	Ar	78	ldnn026	N/N	s	1	78	2	Ar	Ar
nn18	N/N	s	4.62777	4.63467	47.7075	2.266	-0.05	-0.05	0.004	0.003	75.7442	-0.1035	83.4884	2.317	-0.09	-0.09	0.012	0.011	80.0887	-0.3683	57.5495	57.5495	0	1	2	Ar	Ar	79	ldnn027	N/N	s	1	79	2	Ar	Ar
nn19	N/N	s	10.5213	10.3237	49.4212	2.267	-0.056	-0.06	0.005	0.005	76.979	-0.096	67.7285	2.317	-0.042	-0.046	0.017	0.017	79.7245	-0.35	57.5771	57.5771	0	1	2	Ar	Ar	80	ldnn028	N/N	s	1	80	2	Ar	Ar
nn20	N/N	s	19.5092	15.9957	42.6636	2.269	-0.068	-0.072	0.004	0.004	76.0885	-0.0911	60.6502	2.321	-0.057	-0.056	0.017	0.017	78.7522	-0.3538	52.6988	52.6988	0	1	2	Ar	Ar	81	ldnn029	N/N	s	1	81	2	Ar	Ar
nn21	N/N	s	12.5394	12.4967	38.6299	2.265	-0.052	-0.054	0.003	0.003	75.2485	-0.0983	74.5715	2.316	-0.093	-0.093	0.013	0.013	79.5177	-0.3545	53.3935	53.3935	0	1	2	Ar	Ar	82	ldnn030	N/N	s	1	82	2	Ar	Ar
nn22	N/N	s	18.8459	18.2027	30.2866	2.262	-0.003	-0.016	-0.001	-0.001	76.7224	-0.0932	59.0865	2.306	-0.076	-0.076	0.004	0.004	78.867	-0.3602	61.0535	61.0535	0	1	2	R	R	84	ldnn032	N/N	s	1	84	2	R	R
nn23	N/N	s	11.2482	10.4705	50.0343	2.27053	-0.043449	-0.044663	0.0123207	0.0136747	81.6949	-0.10944	79.8243	2.32106	-0.029326	0.060429	0.0182857	0.018294	83.9779	-0.50876	56.0839	56.0839	0	1	2	R	Me/H	94	ldnn063a	N/N	s	1	94	2	R	Me/H
nn24	N/N	s	8.70597	7.92059	51.7745	2.27183	-0.058113	-0.057686	0.0129617	0.014323	81.9951	-0.10573	78.8965	2.32063	-0.019279	0.093466	0.0187713	0.0199573	83.2999	-0.48844	55.9479	55.9479	0	1	2	R	Me/H	95	ldnn063b	N/N	s	1	95	2	R	Me/H
nn25	N/N	s	16.3631	16.6045	33.3787	2.26626	-0.025488	-0.026556	0.013543	0.014004	75.467	-0.05668	67.9822	2.31345	-0.091061	0.019935	0.023574	0.0235415	78.3055	-0.29702	50.7497	50.7497	0	1	2	Ar	Ar	96	ldnn068	N/N	s	1	96	2	Ar	Ar
nn26	N/N	a	11.9863	11.2565	37.0589	2.261	0.045	-0.055	0.0330297	0.0132723	80.2	-0.0845	61.0947	2.312	-0.006	-0.018	0.0500297	0.0192723	83.2	-0.4546	61.7247	40.9265	20.7982	1	2	R	R/H	158	dmlo_nn004b	N/N	a	1	156	2	R	R/H
nn27	N/N	s	10.6885	8.9459	49.8069	2.27	-0.056	-0.057	0.015115	0.013727	81.6	-0.1041	76.851	2.32	-0.024	-0.021	0.022115	0.020727	83.2	-0.4856	55.673	55.673	0	1	2	R	Me/H	161	dmlo_nn005	N/N	s	1	158	2	R	Me/H
nn28	N/N	s	13.1935	11.5312	45.6033	2.27	-0.055	-0.055	0.0107463	0.017927	81.6	-0.1055	72.7126	2.319	-0.026	-0.025	0.0167463	0.023927	83.4	-0.4924	58.5628	58.5628	0	1	2	R	Me/H	162	dmlo_nn006	N/N	s	1	159	2	R	Me/H
nn29	N/N	a	19.6228	19.8324	36.2334	2.264	0.166	-0.098	0.0327223	0.0105763	73.6	-0.0688	59.3337	2.312	0.016	-0.023	0.0427223	0.0155763	77.4	-0.4244	43.515	49.8565	-6.3415	1	2	R	R/H	163	dmlo_nn008b	N/N	a	1	160	2	R	R/H
nn30	N/N	s	8.73392	7.9244	51.7583	2.27	-0.048	-0.05	0.0137913	0.0136977	81.7	-0.1069	78.8859	2.321	-0.018	-0.016	0.0187913	0.0196977	83.3	-0.4884	57.6122	57.6122	0	1	2	R	Me/H	164	dmlo_nn010b	N/N	s	1	161	2	R	Me/H
nn31	N/N	s	21.8122	21.0697	47.2212	2.282	-0.03	-0.037	0.024	0.024	96.3	-0.091	68.8329	2.34	0.048	0.048	0.031	0.031	97.6	-0.091	55.5484	55.5484	0	1	3	R	Me	35	ldnn011	N/N	s	1	35	3	R	Me
nn32	N/N	s	11.5756	11.5799	44.9282	2.274	-0.084	-0.083	0.016	0.017	86.1412	-0.093	72.7762	2.32	-0.073	-0.074	0.027	0.026	88.8736	-0.3821	57.8337	57.8337	0	1	3	R	R	85	ldnn045	N/N	s	1	85	3	R	R
nn33	N/N	s	15.7341	15.901	39.4859	2.28	-0.073	-0.072	0.021	0.02	85.1645	-0.0837	64.2753	2.321	-0.076	-0.083	0.028	0.03	88.3341	-0.3726	53.8413	53.8413	0	1	3	R	R	86	ldnn046	N/N	s	1	86	3	R	R
nn34	N/N	s	18.4869	18.4311	38.8709	2.273	-0.094	-0.091	0.014	0.015	86.4319	-0.0892	65.8717	2.323	-0.068	-0.07	0.025	0.025	89.0813	-0.3832	50.0622	50.0622	0	1	3	R	R	87	ldnn047	N/N	s	1	87	3	R	R
nn35	N/N	s	16.3327	16.3285	40.9754	2.26863	-0.104302	-0.100429	0.0163215	0.015725	85.3204	-0.09073	69.0127	2.32418	-0.08064	-0.082965	0.026726	0.0269985	88.32	-0.39161	53.9326	53.9326	0	1	3	R	R	88	ldnn048	N/N	s	1	88	3	R	R
nn36	N/N	s	21.9903	21.5567	34.4407	2.283	-0.082	-0.083	0.02	0.02	83.9482	-0.0817	58.9409	2.326	-0.082	-0.085	0.033	0.032	87.9418	-0.3756	47.5115	47.5115	0	1	3	R	R	89	ldnn049	N/N	s	1	89	3	R	R
nn37	N/N	s	24.2123	24.2581	33.9638	2.274	-0.105	-0.103	0.016	0.016	85.7914	-0.0891	61.0054	2.326	-0.077	-0.076	0.026	0.027	88.4052	-0.3909	44.9397	44.9397	0	1	3	R	R	90	ldnn050	N/N	s	1	90	3	R	R
nn38	N/N	s	37.2943	32.4292	43.7655	2.29133	-0.028327	-0.025782	0.02462	0.0259997	106.846	-0.09286	56.3234	2.3346	0.100621	0.095449	0.0315457	0.031712	99.6226	-0.43667	55.9145	55.9145	0	1	4	R	Me	178	nf_nn001	N/N	s	1	176	4	R	Me
nn39	N/N	s	32.9626	29.4548	47.1736	2.29335	-0.022138	-0.027826	0.0261967	0.025699	109.269	-0.09061	64.58	2.34097	0.100364	0.099389	0.0311743	0.0302673	103.099	-0.42657	56.9418	56.9418	0	1	4	R	Me	182	nf_nn005_cis	N/N	s	1	180	4	R	Me
nn40	N/N	s	33.5304	30.2868	45.3495	2.29059	-0.043097	-0.04734	0.0264507	0.0265943	105.263	-0.08348	63.6673	2.34452	0.088586	0.088586	0.031737	0.0316813	102.11	-0.42849	53.1404	53.1404	0	1	4	R	Me	183	nf_nn006	N/N	s	1	182	4	R	Me
nn41	N/N	s	8.46248	7.46097	38.6124	2.256	-0.004	0	0.02	0.02	86.8164	-0.108	69.2051	2.318	-0.022	-0.022	0.023	0.023	91.2537	-0.4611	51.7576	51.7576	0	1	4	R	H	83	ldnn031	N/N	s	1	83	4	R	H
N	41	average	14.4517	13.7735	46.4344	2.22992	-0.0303224	-0.0400463	0.0136231	0.0160908	81.3073	-0.0997626	73.3332	2.27772	-0.0324971	-0.0319415	0.0217538	0.0204016	83.1105	-0.332961	57.7892	57.5925	0.1967
reference	nn05	STD	7.75193	7.08725	5.54687	0.00975636	0.0452466	0.0292911	0.0101835	0.00948018	9.18229	0.0115271	7.58605	0.0101058	0.0529414	0.0588277	0.0101924	0.00875543	7.27369	0.15418	4.2055	4.38812	3.54743
		min	2.418	2.25389	30.2866	2.253	-0.105	-0.103	-0.0032025	-0.0032025	64.7	-0.1176	56.3234	2.301	-0.098	-0.105	0.004	0.004	68	-0.50876	43.515	40.9265	-6.3415
		max	37.2943	32.4292	51.7745	2.29335	0.166	0.012	0.0330297	0.031	109.269	-0.05668	83.4884	2.34452	0.100621	0.099389	0.0500297	0.04	103.099	-0.0832	61.7247	61.0535	20.7982
no_ch01	N/O	a	9.776	9.59089	101.474	2.34057	-0.000428	-0.00037	0.015947	0.055962	84.3873	-0.19771	123.985	2.37279	-0.000181	-5e-05	0.029322	0.06659	83.8913	-0.63756	103.5	104.773	-1.27288	1	2	R	Me	209	nf_no010_ch	N/O	a	1	209	2	R	Me
no_ch02	N/O	a	14.6308	14.3999	79.2633	2.32093	-0.09873	-0.148009	-0.003978	0.023457	92.6704	-0.16773	103.011	2.3601	-0.084335	-0.137938	0.002255	0.026816	93.3231	-0.53405	91.9873	79.0599	12.9273	1	3	R	Me	193	nf_no009_ch	N/O	a	1	192	3	R	Me
no_ch03	N/O	a	14.788	14.0552	82.228	2.32603	-0.188346	0.075175	0.004948	0.012582	92.4887	-0.16361	104.906	2.36626	-0.068581	0.003356	0.010889	0.015263	92.9264	-0.52322	90.9613	79.8579	11.1034	1	3	R	Me	98	ldno023_chO	N/O	a	1	97	3	R	Me
no_ch04	N/O	a	14.371	13.5679	70.9443	2.31974	-0.158618	0.071769	0.0174875	0.018026	92.0005	-0.14657	90.1517	2.35238	-0.07333	0.04067	0.0269205	0.021409	92.5198	-0.50492	79.76	74.8728	4.88717	1	3	Ar	Ph	99	ldno025_chO	N/O	a	1	98	3	Ar	Ph
no_ch05	N/O	a	1.21882	0.972207	86.429	2.31937	-0.164384	0.052492	-0.000379	0.033462	90.5508	-0.15292	109.7	2.35545	-0.100783	0.009673	0.0066555	0.03711	92.3138	-0.50552	80.0981	78.4672	1.6309	1	3	R	Me	210	nf_no011_ch	N/O	a	1	210	3	R	Me
no_ch06	N/O	a	9.23227	9.94082	71.2064	2.31497	-0.128959	0.048751	0.0145385	0.02368	90.6283	-0.13616	89.9584	2.34437	-0.085902	0.012103	0.0251085	0.028019	91.9837	-0.46811	73.3442	70.6596	2.68459	1	3	Ar	Ph	100	ldno032_ch	N/O	a	1	99	3	Ar	Ph
no_ch07	N/O	a	13.369	12.6963	68.8037	2.31536	-0.117165	0.050913	0.0132075	0.025257	90.7021	-0.13622	87.2001	2.34538	-0.084644	0.011134	0.023043	0.028956	91.9588	-0.46698	73.113	69.8769	3.23607	1	3	Ar/R	Ph/H	91	ldno021_ch	N/O	a	1	91	3	Ar/R	Ph/H
N	7	average	11.0551	10.7462	80.0498	2.32243	-0.122376	0.0215316	0.0088245	0.0274894	90.4897	-0.157274	101.273	2.35668	-0.071108	-0.00872171	0.0177419	0.0320233	91.2738	-0.520051	84.6805	79.6524	5.02808
reference	no_ch01	STD	4.91225	4.71837	11.4938	0.00881722	0.0618212	0.0787272	0.00857587	0.0141062	2.83846	0.02163	13.2465	0.0105045	0.032913	0.0584861	0.0108814	0.0166676	3.29238	0.0576901	11.214	11.7764	5.15225
		min	1.21882	0.972207	68.8037	2.31497	-0.188346	-0.148009	-0.003978	0.012582	84.3873	-0.19771	87.2001	2.34437	-0.100783	-0.137938	0.002255	0.015263	83.8913	-0.63756	73.113	69.8769	-1.27288
		max	14.788	14.3999	101.474	2.34057	-0.000428	0.075175	0.0174875	0.055962	92.6704	-0.13616	123.985	2.37279	-0.000181	0.04067	0.029322	0.06659	93.3231	-0.46698	103.5	104.773	12.9273
no01	N/O	a	7.46667	7.27317	31.8437	2.24537	0.032692	0.056106	0.0243543	-0.001483	60.7947	-0.08821	46.1804	2.28286	-0.001682	0.030218	0.0310417	0.0032745	63.6206	-0.08821	53.4819	39.6068	13.875	1	1	R	Me	59	ldno002	N/O	a	1	59	1	R	Me
no02	N/O	a	8.10741	7.81154	39.5135	2.25426	0	0	0.021009	0.0158925	80.07	-0.09284	60.0443	2.29987	0	0	0.0270013	0.0228315	82.1368	-0.09284	56.2115	38.4324	17.7791	1	2	R	Me	60	ldno004	N/O	a	1	60	2	R	Me
no03	N/O	a	7.15179	6.83193	35.4025	2.24814	0.037321	0.037373	0.0199397	0.012442	75.9626	-0.08763	52.9313	2.28759	0.027888	-0.087803	0.0299343	0.023938	110.397	-0.08763	51.9299	41.3183	10.6115	1	2	R	Me	61	ldno005	N/O	a	1	61	2	R	Me
no04	N/O	a	3.656	3.62086	39.1086	2.25063	-0.040199	0.023563	-0.0037015	0.008992	74.7648	-0.09324	60.6467	2.29272	-0.100776	-0.002851	0.0039535	0.014272	78.2917	-0.31331	60.3398	40.9861	19.3536	1	2	R	Me	188	nf_no004	N/O	a	1	187	2	R	Me
no05	N/O	a	9.80959	9.3057	33.6669	2.24958	0.003013	0.042522	0.03763	0.0095295	78.2889	-0.08955	53.8808	2.29683	-0.002915	-0.021658	0.043931	0.011058	81.3242	-0.36062	51.1359	37.4028	13.733	1	2	R	Me	187	nf_no003	N/O	a	1	186	2	R	Me
no06	N/O	a	11.7087	6.63897	31.8233	2.25	0.003221	-0.002842	0.039	0.01	77	-0.086	52.4869	2.298	-0.000726	-0.038171	0.045	0.013	80.2	-0.086	49.4874	49.5454	-0.0579905	1	2	R	Me	63	ldno009	N/O	a	1	63	2	R	Me
no07	N/O	a	7.9951	7.54204	36.5533	2.25422	-0.048081	0.02305	0.0034775	0.0236975	74.5241	-0.08587	58.4368	2.29345	-0.089241	-0.004346	0.0106325	0.0265025	78.4546	-0.31921	57.8085	35.4987	22.3098	1	2	R/Ar	Me	189	nf_no005	N/O	a	1	188	2	R/Ar	Me
no08	N/O	a	12.6242	11.9983	42.6523	2.27402	0.069427	-0.103939	0.016147	0.025988	82.0101	-0.07681	54.712	2.2932	0.042797	-0.02537	0.0265927	-0.026761	81.9626	-0.07681	52.9848	48.5178	4.46693	1	2	R	Me	64	ldno010	N/O	a	1	64	2	R	Me
no09	N/O	a	8.59181	-4.14373	36.2268	2.26971	-0.073169	0.089671	0.0054195	0.0254425	75.7873	-0.04486	57.0002	2.28917	-0.090922	-0.044014	0.0126255	0.01585	79.3321	-0.04486	54.0988	54.0883	0.0104804	1	2	Ar/R	Ar/H	65	ldno016	N/O	a	1	65	2	Ar/R	Ar/H
no10	N/O	a	7.21485	6.45054	26.6823	2.25517	0.134935	0.257	0.0378463	0.005655	64	-0.06188	46.0037	2.289	-0.052	-0.036	0.0806777	0.016235	77.8	-0.3337	43.2524	43.5689	-0.316545	1	2	R	R/H	156	dmlo_no002a	N/O	a	1	n1	2	R	R/H
no11	N/O	a	5.24572	4.73493	29.9071	2.25497	0.1	-0.020259	0.0430257	0.01635	74.4	-0.06004	51.3232	2.29299	-0.046665	-0.032795	0.079878	0.026652	79.3	-0.33179	43.2524	35.7652	7.48721	1	2	R	R/H	157	dmlo_no002b	N/O	a	1	155	2	R	R/H
no12	N/O	a	9.10056	8.92988	29.3594	2.24136	-0.028195	0.065648	0.012012	0.0033385	72.6	-0.07599	48.5256	2.28932	-0.03079	-0.027983	0.01609	0.015599	81.3236	-0.36185	50.3827	44.1508	20.7982	1	2	R	R/H	159	dmlo_no003a	N/O	a	1	157	2	R	R/H
no13	N/O	a	9.10056	8.00806	34.0275	2.24872	0.008593	0.006066	0.00579367	0.016672	75.9	-0.08983	49.9441	2.28801	0.001272	-0.059419	0.0139307	0.022124	80.2935	-0.34518	50.3827	35.737	14.6456	1	2	R	R/H	160	dmlo_no003b	N/O	a	1	n2	2	R	R/H
no14	N/O	a	12.258	11.3867	42.6171	2.264	-0.037779	-0.027842	0.024	0.029	89.3	-0.0842	57.2974	2.302	0.024274	0.011829	0.03	0.032	84.9	-0.0842	55.3359	36.9734	18.3626	1	3	R	Me	62	ldno007	N/O	a	1	62	3	R	Me
no15	N/O	a	0.361248	0.19019	39.2684	2.25629	-0.041966	-0.120234	0.0064	0.027968	81.5791	-0.07995	68.7452	2.30146	-0.092291	-0.040173	0.014458	0.050456	84.5613	-0.3305	61.2712	50.793	10.4782	1	3	Ar	Ar	167	dmlo_no004	N/O	a	1	164	3	Ar	Ar
no16	N/O	a	10.6104	9.5951	45.7291	2.26888	-0.0008	-0.113188	0.009452	0.038591	82.2789	-0.09367	65.3326	2.31579	-0.060835	-0.029938	0.017628	0.053826	80.7646	-0.38262	59.223	48.7445	10.4785	1	3	Ar	Ar	168	dmlo_no005	N/O	a	1	165	3	Ar	Ar
no17	N/O	a	18.9839	17.6052	40.7333	2.27395	-0.034413	-0.039062	0.0256187	0.026225	92.3185	-0.0751	57.0796	2.306	0.033683	-0.013045	0.03118	0.032981	86.5009	-0.40138	55.864	37.2201	18.6439	1	4	R	Me	186	nf_no002	N/O	a	1	185	4	R	Me
no18	N/O	a	15.3688	14.5129	40.7903	2.26875	-0.027702	0.012885	0.0266683	0.018042	94.7303	-0.09525	60.2093	2.3098	0.014366	0.006461	0.0301337	0.02339	89.1208	-0.39772	55.5038	40.6507	14.8531	1	4	R	Me	190	nf_no006_cis	N/O	a	1	189	4	R	Me
no19	N/O	a	17.2624	16.1706	37.2266	2.26757	0.008205	-0.032633	0.0253217	0.020022	91.889	-0.08639	56.964	2.30895	0.015555	-0.020079	0.0308627	0.022911	87.02	-0.3985	52.9212	37.4324	15.4888	1	4	R	Me	191	nf_no007	N/O	a	1	190	4	R	Me
no20	N/O	a	18.3196	16.3065	31.098	2.2604	0.026866	-0.04322	0.035878	0.023838	95.9138	-0.0749	46.8769	2.31033	0.093785	-0.003013	0.0444297	0.032018	89.4206	-0.34559	45.1071	32.7244	12.3826	1	4	R	Me	192	nf_no008	N/O	a	1	191	4	R	Me
N	20	average	10.0469	8.53847	36.2115	2.2578	0.00459845	0.00553325	0.0207646	0.0178101	79.7056	-0.0811105	55.2311	2.29737	-0.0157611	-0.0219075	0.030999	0.0216079	82.8363	-0.259126	52.9987	41.4579	12.2692
reference	no02	STD	4.79038	5.3405	5.12056	0.00992721	0.0518935	0.082447	0.0136214	0.0100125	9.43387	0.0130084	6.18146	0.00913362	0.0528439	0.0266726	0.0203766	0.0166866	8.47103	0.13733	5.12379	6.01682	6.93139
		min	0.361248	-4.14373	26.6823	2.24136	-0.073169	-0.120234	-0.0037015	-0.001483	60.7947	-0.09525	46.0037	2.28286	-0.100776	-0.087803	0.0039535	-0.026761	63.6206	-0.40138	43.2524	32.7244	-0.316545
		max	18.9839	17.6052	45.7291	2.27402	0.134935	0.257	0.0430257	0.038591	95.9138	-0.04486	68.7452	2.31579	0.093785	0.030218	0.0806777	0.053826	110.397	-0.04486	61.2712	54.0883	22.3098
oo_ch01	O/O	s	8.8351	8.7357	76.0994	2.307	0.007	0.018	0.014798	0.013042	92.5	-0.1625	92.7463	2.337	0.008	0.008	0.019798	0.018042	94	-0.4651	77.7329	77.7329	0	1	3	R	H	66	ldoo001_ch	O/O	s	1	66	3	R	H
oo_ch02	O/O	s	9.40703	9.39262	77.8822	2.311	0	0	0.015843	0.010899	91.4	-0.161	93.7554	2.338	0	0	0.020843	0.014899	92.9	-0.4712	79.4938	79.4938	0	1	3	R	Me	67	ldoo002_ch	O/O	s	1	67	3	R	Me
oo_ch03	O/O	s	5.90555	5.90246	71.4448	2.301	0	0.006	0.013209	0.008722	90.9	-0.1492	88.275	2.334	-0.007	-0.007	0.021209	0.015722	92.8	-0.421	66.0095	66.0095	0	1	3	Ar	Ph	68	ldoo003_ch	O/O	s	1	68	3	Ar	Ph
oo_ch04	O/O	a	10.8212	10.8516	74.0757	2.305	-0.015	0.014	0.015612	0.009921	89.9	-0.1598	90.3411	2.337	-0.003	-0.003	0.020612	0.015921	91.9	-0.4665	77.9579	77.1958	0.762118	1	3	R	R/H	69	ldoo004_ch	O/O	a	1	69	3	R	R/H
oo_ch05	O/O	a	12.8945	12.8751	73.5985	2.311	-0.025	-0.006	0.012399	0.013042	88.3	-0.1571	89.8702	2.338	-0.014	-0.015	0.017399	0.018042	90.5	-0.4725	77.9526	77.3579	0.594685	1	3	R	R/Me	70	ldoo005_ch	O/O	a	1	70	3	R	R/Me
oo_ch06	O/O	a	9.59596	9.63186	71.7565	2.304	-0.022	-0.004	0.013265	0.007237	87	-0.1506	87.8148	2.338	-0.017	-0.02	0.018265	0.016237	90.2	-0.4526	74.7998	70.8785	3.9213	1	3	Ar/R	Ph/R	71	ldoo006_ch	O/O	a	1	71	3	Ar/R	Ph/R
oo_ch07	O/O	a	3.36027	2.68197	95.4648	2.318	0.178	-0.076	0.006459	0.059788	81.1	-0.1995	105.807	2.336	0.045	-0.001	0.021459	0.077788	82.2	-0.4854	100.009	100.448	-0.439684	1	3	R	Me/H	72	ldoo007_ch	O/O	a	1	72	3	R	Me/H
oo_ch08	O/O	a	2.26867	1.99781	76.5428	2.30134	-0.053997	0.036376	0.032261	0.033341	84.5815	-0.15052	91.2291	2.33721	-0.102394	0.023663	0.037039	0.01662	86.92	-0.45924	77.881	69.0133	8.86767	1	3	0	0	101	ldoo011_ch	O/O	a	1	100	3	0	0
N	8	average	7.88604	7.75864	77.1081	2.30729	0.00862538	-0.001453	0.0154807	0.019499	88.2102	-0.161278	92.4798	2.3369	-0.0112993	-0.00179213	0.022078	0.0241589	90.1775	-0.461692	78.9795	77.2662	1.71326
reference	oo_ch02	STD	3.69938	3.8782	7.75639	0.00577335	0.071101	0.0331454	0.00739837	0.0182459	3.85195	0.0162909	5.75315	0.00136112	0.0415678	0.0135343	0.00621375	0.0216969	3.8955	0.0190808	9.50964	10.544	3.19951
		min	2.26867	1.99781	71.4448	2.301	-0.053997	-0.076	0.006459	0.007237	81.1	-0.1995	87.8148	2.334	-0.102394	-0.02	0.017399	0.014899	82.2	-0.4854	66.0095	66.0095	-0.439684
		max	12.8945	12.8751	95.4648	2.318	0.178	0.036376	0.032261	0.059788	92.5	-0.1492	105.807	2.338	0.045	0.023663	0.037039	0.077788	94	-0.421	100.009	100.448	8.86767
oo01	O/O	s	6.62044	6.16236	23.1497	2.22884	0.049455	0.078372	0.022298	0.0125195	59.5164	-0.07622	29.8122	2.26093	0.031224	0.087958	0.026226	0.0172615	61.0611	-0.23915	36.889	36.889	0	1	1	R	Me	194	nf_oo001	O/O	s	1	193	1	R	Me
oo02	O/O	s	3.87297	3.78449	33.0043	2.23864	-1.7e-05	-0.000175	0.023453	0.0222645	77.3616	-0.08057	45.4836	2.27805	0.00024	0.000198	0.0268205	0.026828	79.6182	-0.28962	36.2944	36.2944	0	1	2	R	Me	195	nf_oo002	O/O	s	1	194	2	R	Me
oo03	O/O	s	3.30857	3.22135	28.2779	2.23519	0.012989	0.008434	0.0204165	0.017117	76.0372	-0.07596	40.4549	2.2732	0.00358	0.005489	0.0216535	0.018628	77.9105	-0.24732	33.9064	33.9064	0	1	2	R	Me	198	nf_oo005	O/O	s	1	197	2	R	Me
oo04	O/O	a	4.23324	4.04333	31.4213	2.241	0.003221	-0.002842	0.013374	0.011891	73.6	-0.0832	42.0065	2.27251	-0.000726	-0.038171	0.020947	0.005868	76.6674	-0.23657	42.8372	34.9121	7.92506	1	2	R	Me	41	ldoo009	O/O	a	1	41	2	R	Me
oo05	O/O	a	4.77521	3.70781	35.4351	2.26935	-0.168032	0.171	0.021616	0.0112685	81.5	-0.02999	42.1294	2.2821	-0.014291	-0.010301	0.021752	0.244931	85.8201	-0.28987	47.7462	41.1286	6.61759	1	2	Ar/H	Ph/H	42	ldoo010	O/O	a	1	n	2	Ar/H	Ph/H
oo06	O/O	s	9.14069	9.15199	33.8959	2.25021	-0.056624	-0.052995	0.0266985	0.027411	86.8598	-0.07636	43.5651	2.28262	-0.006979	-0.00432	0.0304085	0.030392	81.4989	-0.31194	39.4485	39.4485	0	1	3	R	Me	196	nf_oo003	O/O	s	1	195	3	R	Me
oo07	O/O	s	8.9361	8.63176	33.2327	2.25157	-0.039097	-0.022247	0.0257075	0.031305	91.7654	-0.07213	45.2582	2.28508	-0.006316	0.013061	0.0323115	0.030721	86.7354	-0.3032	37.1719	37.1719	0	1	4	R	Me	197	nf_oo004	O/O	s	1	196	4	R	Me
oo08	O/O	s	7.50193	8.44947	41.487	2.26533	-0.068252	-0.076126	0.033646	0.034515	85.6552	-0.09692	49.6904	2.29037	-0.034374	-0.032262	0.041259	0.042012	85.2541	-0.35066	49.484	49.484	0	1	4	0	0	165	dmlo_oo003	O/O	s	1	162	4	0	0
oo09	O/O	s	10.3714	15.0156	36.0853	2.26282	-0.051819	-0.072668	0.028499	0.03323	88.8539	-0.08682	45.5359	2.29449	-0.032739	-0.040486	0.046342	0.045216	88.4311	-0.33795	42.7117	42.7117	0	1	4	0	0	166	dmlo_oo004	O/O	s	1	163	4	0	0
oo10	O/O	s	3.38498	3.3705	41.2983	2.25942	-0.079788	-0.083719	0.036257	0.03592	81.1356	-0.08574	48.2708	2.28438	-0.03932	-0.037079	0.046496	0.04662	82.1101	-0.30345	47.245	47.245	0	1	4	0	0	169	dmlo_oo005	O/O	s	1	166	4	0	0
oo11	O/O	s	5.20041	5.30979	45.4244	2.27193	-0.099446	-0.100836	0.037254	0.037917	84.1678	-0.09083	55.219	2.2999	-0.053014	-0.051399	0.051249	0.050706	82.577	-0.35272	46.9704	46.9704	0	1	4	0	0	170	dmlo_oo006	O/O	s	1	167	4	0	0
N	11	average	6.12236	6.44077	34.792	2.25221	-0.0452191	-0.013982	0.0262927	0.0250326	80.5866	-0.0777036	44.3115	2.28215	-0.0138832	-0.00975564	0.0332241	0.0508349	80.6985	-0.296586	41.8822	40.5602	1.32206
reference	oo02	STD	2.52858	3.62124	6.30919	0.0147272	0.0605815	0.0805406	0.00725396	0.0103716	8.92289	0.0174425	6.34891	0.0109016	0.0240228	0.0389473	0.0111921	0.0658679	7.48466	0.0418738	5.44338	5.39379	2.95589
		min	3.30857	3.22135	23.1497	2.22884	-0.168032	-0.100836	0.013374	0.0112685	59.5164	-0.09692	29.8122	2.26093	-0.053014	-0.051399	0.020947	0.005868	61.0611	-0.35272	33.9064	33.9064	0
		max	10.3714	15.0156	45.4244	2.27193	0.049455	0.171	0.037254	0.037917	91.7654	-0.02999	55.219	2.2999	0.031224	0.087958	0.051249	0.244931	88.4311	-0.23657	49.484	49.484	7.92506
pn01	P/N	a	9.48294	9.01984	35.1402	2.25881	0.106188	0.011102	-0.0176697	0.023523	66.577	-0.10148	71.8891	2.3358	-0.000534	-0.001305	-0.0269217	0.034962	72.8613	-0.626	71.8591	56.7267	15.1324	1	1	R	Me	212	nf_pn006	P/N	a	1	212	1	R	Me
pn02	P/N	a	8.6043	10.4918	33.6274	2.258	0.091	0.016	-0.012	0.023	66.9	-0.0985	72.2052	2.341	0.014	-0.004	-0.02	0.033	72.4	-0.0985	70.6939	54.874	15.8199	1	1	Ar/R	Ph/Me	43	ldpn001	P/N	a	1	43	1	Ar/R	Ph/Me
pn03	P/N	a	8.72164	8.24787	29.8015	2.248	0.17	-0.037	-0.007	0.003	63.6	-0.0894	64.0218	2.327	0.06	-0.097	-0.012	0.007	69.4	-0.0894	67.8591	57.7607	10.0983	1	1	Ar/R	Ph/Me	44	ldpn002	P/N	a	1	44	1	Ar/R	Ph/Me
pn04	P/N	a	8.77773	8.09061	28.6133	2.24554	0.201609	-0.024045	-0.000579	0.0022035	62.8964	-0.0918	62.5207	2.31968	0.05659	-0.091659	-0.0113037	0.00704	69.2857	-0.53235	69.3339	57.8197	11.5142	1	1	R	Me	211	nf_pn005	P/N	a	1	211	1	R	Me
pn05	P/N	a	14.5665	14.2571	40.0058	2.274	-0.000232	-0.000174	-0.0192393	0.020717	82.5268	-0.11313	84.906	2.35592	-0.000196	-0.000236	-0.0264403	0.0320047	86.7909	-0.66203	74.2925	52.3096	21.9829	1	2	R	Me	215	nf_pn009	P/N	a	1	215	2	R	Me
pn06	P/N	a	25.3933	13.6187	40.4208	2.278	0.005	-0.022	-0.013	0.022	81.3	-0.096	83.7972	2.355	0.035	-0.002	-0.019	0.033	86.3	-0.096	72.3985	53.7545	18.644	1	2	Ar/R	Ph/Me	45	ldpn003	P/N	a	1	45	2	Ar/R	Ph/Me
pn07	P/N	a	18.2248	17.9148	31.7346	2.2682	-0.010566	0.038162	-0.0164913	0.0452317	80.9946	-0.11168	77.7614	2.35507	-0.009127	-0.001981	-0.0224257	0.0568053	85.8933	-0.65535	72.8819	44.9226	27.9593	1	2	R	Me	213	nf_pn007	P/N	a	1	213	2	R	Me
pn08	P/N	a	19.4602	17.1447	32.218	2.27	0.005	0.04	-0.013	0.044	79.4	-0.1039	75.8284	2.354	0.006	-0.002	-0.014	0.058	85.9	-0.1039	72.5644	44.1323	28.4321	1	2	Ar/R	Ph/Me	46	ldpn004	P/N	a	1	46	2	Ar/R	Ph/Me
pn09	P/N	a	9.65338	8.65502	37.743	2.26673	0.022726	-0.043388	-0.0167773	0.005723	78.4812	-0.10389	83.5813	2.34914	-0.001564	-0.095123	-0.0235703	0.0155085	84.9	-0.61541	72.3481	55.2184	17.1298	1	2	R	Me	214	nf_pn008	P/N	a	1	214	2	R	Me
pn10	P/N	a	13.4982	10.5609	37.2613	2.266	0.033	-0.054	-0.018	0.004	78.8	-0.0988	82.6143	2.346	0.025	-0.094	-0.022	0.012	84.2	-0.0988	69.949	59.3927	10.5563	1	2	Ar/R	Ph/Me	47	ldpn005	P/N	a	1	47	2	Ar/R	Ph/Me
pn11	P/N	a	20.4705	12.3894	33.5383	2.266	0.01	-0.007	-0.021	0.009	78.4	-0.0875	73.8229	2.344	0.035	-0.073	-0.021	0.019	83.7	-0.0875	70.4206	55.9634	14.4571	1	2	Ar	Ph	48	ldpn006	P/N	a	1	48	2	Ar	Ph
pn12	P/N	a	9.93105	9.15733	37.6427	2.26855	0.062343	-0.078647	-0.019428	0.0038065	77.9549	-0.09625	82.0983	2.34741	0.006814	-0.121911	-0.0242647	0.0067085	84.0606	-0.61725	71.972	59.7688	12.2032	1	2	R/Ar	Me	219	nf_pn013	P/N	a	1	219	2	R/Ar	Me
pn13	P/N	a	10.4473	8.49637	40.2269	2.27	0.07	-0.092	-0.018	0.005	77.8	-0.0883	82.384	2.347	0.038	-0.127	-0.015	0.007	84	-0.0883	72.1536	60.787	11.3666	1	2	Ar/R	Ph/R	49	ldpn007	P/N	a	1	49	2	Ar/R	Ph/R
pn14	P/N	a	12.2583	12.2269	37.4645	2.26752	-0.034937	0.037588	-0.024569	0.0305957	79.1462	-0.1041	83.8895	2.35849	-0.018437	0.007293	-0.034361	0.046541	86.5167	-0.65389	71.5574	49.2356	22.3218	1	2	R	Me	216	nf_pn010	P/N	a	1	216	2	R	Me
pn15	P/N	a	13.249	12.8814	37.3643	2.269	-0.032	0.042	-0.0194397	0.0217947	78.6	-0.0971	79.9035	2.357	-0.002	0.012	-0.0224397	0.0377947	85.8	-0.0971	70.3572	45.4949	24.8623	1	2	Ar/R	Ph/Me	52	ldpn011	P/N	a	1	52	2	Ar/R	Ph/Me
pn16	P/N	a	11.4632	10.3362	42.3297	2.271	0.023	-0.046	-0.013	0.004	81.9	-0.1102	87.9111	2.35	0.029	-0.072	-0.014	0.008	85.553	-0.6415	71.6634	59.4866	12.1768	1	2	Ar/R	Ph/H	73	ldpn014	P/N	a	1	73	2	Ar/R	Ph/H
pn17	P/N	a	12.1271	11.595	41.9162	2.278	0.015	-0.031	-0.012	0.013	81.7	-0.1073	88.4138	2.354	0.025	-0.061	-0.014	0.018	86.1359	-0.648	72.0412	57.9486	14.0926	1	2	Ar/R	Ph/HMe	74	ldpn015	P/N	a	1	74	2	Ar/R	Ph/HMe
pn18	P/N	a	9.95156	9.16655	34.698	2.263	0.01	0.014	-0.02	0.02	75.4	-0.1069	78.3924	2.348	0.011	-0.069	-0.017	0.028	85.3194	-0.6387	70.5703	51.3208	19.2495	1	2	Ar/R	Ph/H	75	ldpn016	P/N	a	1	75	2	Ar/R	Ph/H
pn19	P/N	a	10.8532	9.65278	38.2771	2.27128	0.038616	-0.052304	-0.020697	0.004061	77.7063	-0.09565	83.1768	2.35011	-0.004597	-0.069979	-0.031843	0.013347	84.5078	-0.61225	72.8784	57.7058	15.1726	1	2	R/Ar	Me	218	nf_pn012	P/N	a	1	218	2	R/Ar	Me
pn20	P/N	a	10.5659	8.37777	39.7155	2.26966	0.031957	-0.051835	-0.0167573	0.0043755	77.2967	-0.09271	83.4464	2.346	0.012	-0.066	-0.024	0.013	84.1162	-0.5938	71.2361	57.7296	13.5065	1	2	Ar	Ph/Ar	76	ldpn019	P/N	a	1	76	2	Ar	Ph/Ar
pn21	P/N	a	18.2951	15.3629	37.4216	2.27947	-0.057208	-0.024777	-0.0161147	0.007723	91.3814	-0.10156	81.4502	2.35508	0.03628	-0.073852	-0.0174227	0.013261	94.3479	-0.58869	72.0438	56.6722	15.3716	1	2	Ar	Ph/Ar	103	ldpn028	P/N	a	1	102	2	Ar	Ph/Ar
pn22	P/N	a	20.0864	17.1296	43.3502	2.2853	-0.032705	-0.036696	-0.0253167	0.02301	93.7753	-0.11703	85.3589	2.36705	0.032895	0.015237	-0.0298567	0.031963	98.1086	-0.63764	73.7625	72.7723	0.99021	1	3	R	Me	217	nf_pn011	P/N	a	1	217	3	R	Me
pn23	P/N	a	25.9851	19.7633	42.3598	2.287	-0.025	-0.042	-0.018	0.025	92.6	-0.1047	79.1178	2.365	0.044	0.036	-0.02	0.034	96.8	-0.1047	72.1118	54.4873	17.6245	1	3	Ar/R	Ph/Me	50	ldpn008	P/N	a	1	50	3	Ar/R	Ph/Me
pn24	P/N	a	23.4932	22.1786	37.5123	2.295	0.002	-0.076	-0.013	0.02	90.7	-0.0774	72.9463	2.348	0.05	-0.09	-0.012	0.019	87	-0.0774	72.4324	56.6663	15.7661	1	3	Ar/R	Ph/R	51	ldpn009	P/N	a	1	51	3	Ar/R	Ph/R
pn25	P/N	a	16.8064	10.3459	41.6714	2.27991	-0.018905	-0.078875	-0.0136767	0.00856833	86.9627	-0.10473	87.9741	2.35574	0.021783	-0.082143	-0.0130157	0.00863333	90.774	-0.64923	68.9971	60.9536	8.0435	1	3	Ar/R	Ph/H	102	ldpn022	P/N	a	1	101	3	Ar/R	Ph/H
pn26	P/N	a	14.0026	13.0428	37.4517	2.27482	0.013345	-0.04108	-0.0155127	0.0089435	81.0555	-0.08588	78.3153	2.34397	0.046565	-0.069843	-0.019679	0.013513	85.5528	-0.5667	68.0317	58.4118	9.61991	1	3	Ar	Ph/Ar	104	ldpn030	P/N	a	1	103	3	Ar	Ph/Ar
pn27	P/N	a	31.718	27.2068	39.8004	2.30117	0.013593	-0.027105	-0.0155907	0.0263723	107.878	-0.10584	76.1727	2.36192	0.082843	0.036843	-0.013114	0.0317543	103.222	-0.57745	72.2765	53.3439	18.9326	1	4	Ar/R	Ph	199	nf_pn001	P/N	a	1	198	4	Ar/R	Ph
pn28	P/N	a	27.0871	24.3524	40.9081	2.29418	0.055657	-0.012448	-0.00807367	0.02659	108.907	-0.11117	78.4468	2.36209	0.080673	0.036493	-0.00786967	0.0322943	103.149	-0.56711	72.3893	55.6254	16.7639	1	4	Ar/R	Ph	200	nf_pn002_cis	P/N	a	1	199	4	Ar/R	Ph
pn29	P/N	a	25.7727	23.498	39.8965	2.29254	0.018264	-0.014525	-0.0114463	0.0286283	101.216	-0.11023	78.7232	2.36374	0.068294	0.034176	-0.00986067	0.0346597	102.13	-0.57279	71.0086	52.3653	18.6433	1	4	Ar/R	Ph	201	nf_pn003	P/N	a	1	201	4	Ar/R	Ph
pn30	P/N	a	28.7626	25.1469	35.4482	2.28898	-0.007964	0.018586	-0.018332	0.0366223	97.9568	-0.09738	67.8988	2.34688	0.100205	0.042822	-0.012395	0.0496993	95.946	-0.55839	67.4156	43.1781	24.2376	1	4	Ar/R	Ph	202	nf_pn004	P/N	a	1	202	4	Ar/R	Ph
N	30	average	16.3236	14.0103	37.5187	2.27352	0.0259594	-0.0225154	-0.0157904	0.0173496	82.6604	-0.10035	78.9656	2.35034	0.0293496	-0.0381389	-0.0190261	0.025183	86.8224	-0.438538	71.3167	55.2276	16.089
reference	pn05	STD	6.95091	5.71395	3.789	0.0131491	0.0570353	0.0375468	0.00509861	0.0124468	11.4412	0.00921736	6.61778	0.0104337	0.0296493	0.0537947	0.00676122	0.0152405	8.7572	0.249671	1.68194	5.93437	5.97607
		min	8.6043	8.09061	28.6133	2.24554	-0.057208	-0.092	-0.0253167	0.0022035	62.8964	-0.11703	62.5207	2.31968	-0.018437	-0.127	-0.034361	0.0067085	69.2857	-0.66203	67.4156	43.1781	0.99021
		max	31.718	27.2068	43.3502	2.30117	0.201609	0.042	-0.000579	0.0452317	108.907	-0.0774	88.4138	2.36705	0.100205	0.042822	-0.00786967	0.058	103.222	-0.0774	74.2925	72.7723	28.4321
po_ch01	P/O	a	10.2079	4.62683	88.3801	2.333	0	0	-0.0293817	0.036589	83.1473	-0.18604	128.202	2.40288	0	0	-0.038434	0.049672	84.556	-0.80021	102.37	100.251	2.1191	1	2	R	Me	222	nf_po008_ch	P/O	a	1	222	2	R	Me
N	1	average
reference	po_ch01	STD
		min
		max
po01	P/O	a	5.98216	5.08043	28.0789	2.24816	0.076514	0.00912	-0.0176997	0.0247375	63.7518	-0.1005	56.5316	2.30894	0.012027	0.028717	-0.020548	0.029969	69.3021	-0.5074	71.2415	37.0002	34.2413	1	1	R	Me	220	nf_po006	P/O	a	1	220	1	R	Me
po02	P/O	a	7.30265	6.32816	28.6002	2.254	0.054	-0.002	-0.0246217	0.0232965	64.2	-0.09453	57.0411	2.311	0.022	0.004	-0.0256217	0.0302965	69.6	-0.09453	71.8188	36.5755	35.2433	1	1	Ar/R	Ph/Me	53	ldpo002	P/O	a	1	53	1	Ar/R	Ph/Me
po03	P/O	a	7.99501	6.92009	33.9859	2.25615	0.000122	1.6e-05	-0.0243207	0.021262	79.4082	-0.11602	70.7099	2.33097	0.000231	0.000263	-0.0287013	0.0298325	83.6678	-0.56543	72.3863	72.5105	-0.124247	1	2	R	Me	221	nf_po007	P/O	a	1	221	2	R	Me
po04	P/O	a	8.74232	7.91009	33.3525	2.266	0.005	-0.036	-0.011185	0.024739	78.9	-0.09867	68.4702	2.327	0.03	0.003	-0.016185	0.027739	83.5	-0.09867	71.3673	37.7552	33.6121	1	2	Ar/R	Ph/Me	54	ldpo004	P/O	a	1	54	2	Ar/R	Ph/Me
po05	P/O	a	7.77132	6.34185	29.637	2.25378	0.066232	-0.01134	-0.0159853	0.013448	76.9881	-0.08691	63.6989	2.3197	0.009213	-0.096876	-0.0194247	0.020997	84.3185	-0.49632	70.0767	42.0754	28.0014	1	2	R	Me	224	nf_po010	P/O	a	1	224	2	R	Me
po06	P/O	a	9.14999	8.05629	29.278	2.25	0.051	-0.015	-0.0164887	0.013563	76.7	-0.0841	63.4049	2.318	0.038	-0.108	-0.0124887	0.022563	84.5	-0.0841	69.5436	40.9731	28.5705	1	2	Ar	Ph	55	ldpo005	P/O	a	1	55	2	Ar	Ph
po07	P/O	a	7.93952	7.10368	30.9163	2.25592	-0.009747	0.087	-0.0212567	0.017713	76.3	-0.10949	66.1953	2.3263	0.026667	-0.005023	-0.0228087	0.022627	82.8534	-0.5291	71.6022	30.8617	40.7404	1	2	Ar/R	Me	204	nf_po002	P/O	a	1	204	2	Ar/R	Me
po08	P/O	a	8.13535	6.86465	30.0236	2.25116	-0.012069	0.064321	-0.0221303	0.011979	73.9035	-0.11507	67.1129	2.32565	0.000365	0.01498	-0.0281783	0.019667	82.2146	-0.54071	72.0815	72.0815	0	1	2	R	Me	223	nf_po009	P/O	a	1	223	2	R	Me
po09	P/O	a	6.21229	4.82065	32.0705	2.256	-0.034	0.084	-0.0184727	0.0168025	73.2	-0.10409	66.3253	2.324	0.017	0.042	-0.0174727	0.0218025	80.9	-0.10409	70.7295	72.6601	-1.93059	1	2	Ar/R	Ph/Me	57	ldpo009	P/O	a	1	57	2	Ar/R	Ph/Me
po10	P/O	a	8.16687	10.5043	37.792	2.28	0.102	-0.179	0.109784	0.029146	80.5	-0.07871	67.2621	2.326	0.021	-0.056	0.107784	0.034146	84.5	-0.07871	72.2013	46.8682	25.333	1	2	R	Me	58	ldpo010	P/O	a	1	n	2	R	Me
po11	P/O	a	12.758	11.1785	36.9476	2.27119	-0.031918	-0.050159	-0.0262927	0.027801	87.3065	-0.11949	69.4613	2.32587	0.02839	-0.008388	-0.0304277	0.031877	85.7824	-0.56872	74.3289	39.1037	35.2252	1	3	R	Me	225	nf_po011	P/O	a	1	225	3	R	Me
po12	P/O	a	12.2281	10.7055	35.8626	2.269	-0.028	-0.051	-0.0221327	0.030307	87	-0.1075	65.6539	2.323	0.042	-0.002	-0.0231327	0.033307	86	-0.1075	70.8746	39.121	31.7535	1	3	Ar/R	Ph/Me	56	ldpo007	P/O	a	1	56	3	Ar/R	Ph/Me
po13	P/O	a	19.4792	16.9459	35.2513	2.27891	0.001574	-0.053817	-0.0172017	0.0239515	89.8227	-0.09827	67.3004	2.32928	0.052916	-0.035773	-0.0151523	0.029265	84.3671	-0.56434	72.3354	37.5544	34.781	1	4	Ar/R	Me	203	nf_po001	P/O	a	1	203	4	Ar/R	Me
po14	P/O	a	15.5465	12.1384	35.2815	2.27855	0.063076	-0.077793	-0.0114003	0.0283785	96.8574	-0.09571	65.8181	2.33096	0.060813	-0.006368	-0.0135607	0.0284875	97.9659	-0.49561	70.8407	38.022	32.8187	1	4	Ar/R	Me	205	nf_po003	P/O	a	1	205	4	Ar/R	Me
po15	P/O	a	12.613	11.1616	35.4831	2.27251	0.037082	-0.065397	-0.013452	0.022173	87.0672	-0.0934	70.2782	2.3329	0.039805	-0.04975	-0.017157	0.025332	85.2741	-0.56245	71.8559	40.2576	31.5982	1	4	Ar/R	Me	206	nf_po004	P/O	a	1	206	4	Ar/R	Me
po16	P/O	a	16.4498	15.0794	30.5077	2.27033	0.041353	-0.088884	-0.011987	0.028028	85.583	-0.08926	63.0611	2.33236	0.067955	-0.038756	-0.0114613	0.0352065	89.0078	-0.52428	68.5713	31.7842	36.7871	1	4	Ar/R	Me	207	nf_po005	P/O	a	1	207	4	Ar/R	Me
N	16	average	10.4045	9.19621	32.6918	2.26323	0.0238887	-0.0241208	-0.0103027	0.0223328	79.843	-0.0994825	65.5203	2.3245	0.0292739	-0.0196234	-0.0121585	0.0276947	83.3596	-0.370123	71.366	44.7003	26.6657
reference	po03	STD	3.99281	3.51676	3.1809	0.0111975	0.0426786	0.0680554	0.0323854	0.00600092	8.93038	0.011866	4.08481	0.00705084	0.0200966	0.04184	0.0325264	0.00495489	6.63807	0.22167	1.32167	14.2363	14.0491
		min	5.98216	4.82065	28.0789	2.24816	-0.034	-0.179	-0.0262927	0.011979	63.7518	-0.11949	56.5316	2.30894	0.000231	-0.108	-0.0304277	0.019667	69.3021	-0.56872	68.5713	30.8617	-1.93059
		max	19.4792	16.9459	37.792	2.28	0.102	0.087	0.109784	0.030307	96.8574	-0.07871	70.7099	2.3329	0.067955	0.042	0.107784	0.0352065	97.9659	-0.07871	74.3289	72.6601	40.7404
pp01	P/P	s	12.7201	12.402	27.7834	2.258	0.047	0.05	-0.014	-0.014	68.3	-0.1205	82.0947	2.37	0.006	0.006	-0.017	-0.017	75.4	-0.1205	72.7697	72.7697	0	1	1	R	Me	1	ldpp001	P/P	s	1	1	1	R	Me
pp02	P/P	s	11.1903	11.103	29.8498	2.269	0.046	0.024	-0.008	-0.009	69.5	-0.1107	86.1334	2.379	0.023	0.025	-0.015	-0.014	74.4	-0.1107	69.8035	69.8035	0	1	1	Ar	Ph	2	ldpp002	P/P	s	1	2	1	Ar	Ph
pp03	P/P	s	8.81829	8.71286	30.5137	2.262	0.062	0.037	-0.016	-0.018	66.3	-0.1084	83.0278	2.368	0.02	0.018	-0.023	-0.021	73.1	-0.1084	69.3849	69.3849	0	1	1	Ar	Ph	3	ldpp003	P/P	s	1	3	1	Ar	Ph
pp04	P/P	s	15.9863	14.784	34.7664	2.268	0	0	-0.018	-0.018	82	-0.132	99.9863	2.388	0	0	-0.022	-0.023	88.3	-0.132	72.8613	72.8613	0	1	2	R	Me	4	ldpp004	P/P	s	1	4	2	R	Me
pp05	P/P	s	17.2401	15.9549	34.7827	2.276	0.011	0	-0.014	-0.014	82.5	-0.1067	94.4153	2.383	0.031	0.034	-0.015	-0.015	87.4	-0.1067	71.718	71.718	0	1	2	Ar	Ph	5	ldpp005	P/P	s	1	5	2	Ar	Ph
pp06	P/P	s	16.3503	14.8097	27.3755	2.261	-0.002	0.016	-0.017	-0.02	78.9	-0.0675	81.338	2.365	0.006	0.009	-0.017	-0.019	88	-0.0675	66.6075	66.6075	0	1	2	R	R	6	ldpp006	P/P	s	1	6	2	R	R
pp07	P/P	s	12.146	12.6097	24.9791	2.255	0.015	0.114	-0.035	-0.022	77.6	-0.1178	82.0822	2.371	0.008	0.016	-0.047	-0.036	86.4	-0.1178	66.4407	66.4407	0	1	2	OAr	OPh	7	ldpp007	P/P	s	1	7	2	OAr	OPh
pp08	P/P	s	12.968	12.183	35.087	2.274	0.002	-0.003	-0.018	-0.019	79.8	-0.1006	95.7123	2.381	0.01	0.011	-0.018	-0.018	87.9	-0.1006	68.7518	68.7518	0	1	2	Ar	Ph	8	ldpp008	P/P	s	1	8	2	Ar	Ph
pp09	P/P	s	14.3548	13.6457	36.1695	2.277	-0.01	-0.01	-0.016	-0.017	77.5	-0.0956	95.6634	2.376	0.015	0.018	-0.017	-0.018	86.3	-0.0956	68.5391	68.5391	0	1	2	Ar	Ph	9	ldpp009	P/P	s	1	9	2	Ar	Ph
pp10	P/P	s	14.8668	12.9002	38.5145	2.275	-0.032	-0.019	-0.022	-0.019	81.1	-0.1079	107.452	2.392	0.002	0.003	-0.029	-0.028	88.4	-0.1079	71.4723	71.4723	0	1	2	R	R	10	ldpp010	P/P	s	1	10	2	R	R
pp11	P/P	s	15.9888	13.7549	30.0676	2.273	0.019	0.014	-0.006	-0.006	84.1	-0.0915	89.7541	2.372	0.026	0.027	-0.008	-0.008	90.7	-0.0915	68.337	68.337	0	1	2	Ar	Ph	11	ldpp011	P/P	s	1	11	2	Ar	Ph
pp12	P/P	s	21.1871	15.82	37.7684	2.282	-0.068	-0.066	-0.021	-0.02	92.6	-0.1407	102.136	2.389	0.016	0.017	-0.026	-0.025	97.6	-0.1407	72.9894	72.9894	0	1	3	R	Me	12	ldpp012	P/P	s	1	12	3	R	Me
pp13	P/P	s	22.9843	17.6084	38.6105	2.295	-0.035	-0.045	-0.015	-0.014	90.9	-0.1141	94.0613	2.379	0.038	0.039	-0.017	-0.016	94.9	-0.1141	71.6383	71.6383	0	1	3	Ar	Ph	13	ldpp013	P/P	s	1	13	3	Ar	Ph
pp14	P/P	s	17.6561	14.8719	35.0556	2.278	-0.062	-0.062	-0.019	-0.002	81	-0.0779	94.4341	2.377	0.012	0.013	-0.021	-0.005	90.8	-0.0779	68.1387	68.1387	0	1	3	Ar	Ph	14	ldpp014	P/P	s	1	14	3	Ar	Ph
pp15	P/P	a	24.3346	23.2292	39.9345	2.3	-0.041	-0.087	-0.016	-0.017	89.1	-0.1172	95.8265	2.385	0.036	0.067	-0.016	-0.02	93.3	-0.1172	73.7353	65.5103	8.22498	1	3	Ar	Ph	27	ldpp028	P/P	a	1	27	3	Ar	Ph
pp16	P/P	s	29.0517	23.3432	36.2385	2.294	0.014	-0.052	-0.011	-0.02	98.7	-0.1152	87.0182	2.37	0.081	0.063	-0.007	-0.013	100.8	-0.1152	69.8198	69.8198	0	1	3	Ar	Ph	26	ldpp027	P/P	s	1	26	3	Ar	Ph
pp17	P/P	s	27.3362	16.7601	39.7744	2.28932	-0.025659	-0.042542	-0.0194407	-0.024168	102.527	-0.15796	101.748	2.38706	0.038356	0.033129	-0.0220077	-0.0259307	102.149	-0.81292	73.207	73.207	0	1	4	R	Me	226	nf_pp001	P/P	s	1	226	4	R	Me
pp18	P/P	s	26.1683	22.5639	33.8295	2.288	-0.03	-0.028	-0.018	-0.011	93.4	-0.1147	86.6806	2.375	0.067	0.054	-0.014	-0.008	94.4	-0.1147	71.4589	71.4589	0	1	4	Ar	Ph	15	ldpp015	P/P	s	1	15	4	Ar	Ph
pp19	P/P	s	29.4018	19.4772	38.815	2.303	-0.021	-0.042	-0.01	-0.014	103.9	-0.1186	90.29	2.378	0.058	0.057	-0.012	-0.014	103.5	-0.1186	71.4432	71.4432	0	1	4	Ar	Ph	16	ldpp016	P/P	s	1	16	4	Ar	Ph
pp20	P/P	s	23.7505	19.0297	36.5861	2.293	-0.016	-0.002	-0.011	-0.008	96.5	-0.1118	92.6137	2.379	0.049	0.052	-0.011	-0.01	100.9	-0.1118	70.938	70.938	0	1	4	Ar	Ph	17	ldpp017	P/P	s	1	17	4	Ar	Ph
pp21	P/P	s	26.6333	23.0182	34.125	2.295	-0.026	-0.021	-0.011	-0.009	94.5	-0.1055	86.4026	2.377	0.042	0.046	-0.009	-0.01	95.2	-0.1055	68.3941	68.3941	0	1	4	Ar	Ph	18	ldpp018	P/P	s	1	18	4	Ar	Ph
pp22	P/P	s	29.6252	26.5429	31.187	2.295	-0.032	-0.012	-0.01	-0.007	93.6	-0.1016	83.3636	2.379	0.043	0.045	-0.008	-0.008	95	-0.1016	66.4689	66.4689	0	1	4	Ar	Ph	19	ldpp019	P/P	s	1	19	4	Ar	Ph
pp23	P/P	s	16.1043	19.0279	32.6655	2.284	-0.016	-0.018	-0.02	-0.019	92	-0.1419	95.642	2.384	0.019	0.02	-0.021	-0.02	98.6	-0.1419	69.8687	69.8687	0	1	4	Ar	Ph	20	ldpp020	P/P	s	1	20	4	Ar	Ph
pp24	P/P	s	37.6633	27.0167	35.033	2.289	-0.03	-0.013	-0.021	-0.01	106.7	-0.1241	74.5138	2.375	0.073	0.122	-0.013	0.004	106.8	-0.1241	70.0514	70.0514	0	1	5	Ar	Ph	21	ldpp021	P/P	s	1	21	5	Ar	Ph
pp25	P/P	s	36.8372	25.4498	39.7676	2.297	-0.03	-0.043	-0.016	-0.017	107.8	-0.1245	76.6549	2.373	0.121	0.122	-0.005	-0.005	108.8	-0.1245	67.0606	67.0606	0	1	5	Ar	Ph	22	ldpp022	P/P	s	1	22	5	Ar	Ph
pp26	P/P	s	47.7609	27.818	36.0308	2.3	-0.033	-0.022	-0.011	-0.014	113.8	-0.1324	79.3318	2.371	0.04	0.09	-0.009	-0.004	94.2	-0.1324	64.7025	64.7025	0	1	6	Ar	Ph	23	ldpp023	P/P	s	1	23	6	Ar	Ph
pp27	P/P	s	31.5166	24.5173	19.6358	2.268	-0.041	0.002	-0.017	-0.017	94.5	-0.1364	81.6254	2.378	0.021	0.027	-0.018	-0.016	98.2	-0.1364	69.2337	69.2337	0	1	6	Ar	Ph	24	ldpp024	P/P	s	1	24	6	Ar	Ph
pp28	P/P	s	28.4537	24.6202	28.261	2.275	0.003	0.066	-0.021	-0.014	90.8	-0.1273	85.2511	2.375	0.024	0.041	-0.025	-0.018	94	-0.1273	71.0893	71.0893	0	1	6	Ar	Ph	25	ldpp025	P/P	s	1	25	6	Ar	Ph
N	25	average	22.4677	18.342	33.686	2.28119	-0.011845	-0.00944793	-0.0161229	-0.014756	88.926	-0.115038	89.4733	2.37772	0.0330484	0.0383975	-0.0172146	-0.0153904	92.6946	-0.138429	69.8901	69.5964	0.293749
reference	pp04	STD	9.31059	5.53567	4.94763	0.0139274	0.0312931	0.0423803	0.00566802	0.00534161	12.1432	0.0191394	8.25524	0.00669095	0.027512	0.031973	0.00846953	0.00840902	8.87591	0.133301	2.35453	2.37007	1.55438
		min	8.81829	8.71286	19.6358	2.255	-0.068	-0.087	-0.035	-0.024168	66.3	-0.15796	74.5138	2.365	0	0	-0.047	-0.036	73.1	-0.81292	64.7025	64.7025	0
		max	47.7609	27.818	39.9345	2.303	0.062	0.114	-0.006	-0.002	113.8	-0.0675	107.452	2.392	0.121	0.122	-0.005	0.004	108.8	-0.0675	73.7353	73.207	8.22498

## Sheet: correlations
	He8	nHe8	BE, Zn	mean Zn-Cl	dZn-D1	dZn-D2	dD1-R, Zn	dD2-R, Zn	D1-Zn-D2	Q, Zn	BE, Pd	mean Pd-Cl	dPd-D1	dPd-D2	dD1-R, Pd	dD2-R, Pd	D1-Pd-D2	Q, Pd	BE, Au, D1	BE, Au, D2
He8	1
nHe8	0.931011	1
BE, Zn	0.0907885	0.130655	1
mean Zn-Cl	0.539489	0.54376	0.830291	1
dZn-D1	-0.0116079	-0.000480078	-0.190672	-0.127295	1
dZn-D2	-0.0639243	-0.109196	-0.0199761	-0.0133013	0.0265894	1
dD1-R, Zn	-0.305603	-0.250137	-0.0552834	-0.254765	-0.0827994	-0.122768	1
dD2-R, Zn	-0.272188	-0.228159	0.190357	-0.00688712	-0.0321287	-0.0583893	0.363458	1
D1-Zn-D2	0.765066	0.738895	0.43002	0.72862	-0.188026	-0.181714	-0.164271	-0.0870722	1
Q, Zn	-0.175257	-0.183379	-0.747616	-0.695638	0.118957	0.00171929	0.270175	-0.0134528	-0.389287	1
BE, Pd	0.329061	0.325296	0.72475	0.793938	-0.0585661	-0.000629554	-0.54063	-0.291531	0.439634	-0.717365	1
mean Pd-Cl	0.575965	0.536291	0.377014	0.682098	-0.00741961	-0.00561875	-0.596095	-0.353048	0.502397	-0.620698	0.820771	1
dPd-D1	0.497562	0.445144	-0.159149	0.132642	0.455261	-0.0192351	-0.28421	-0.115338	0.355689	-0.051416	0.0625144	0.360134	1
dPd-D2	0.505641	0.468062	0.129397	0.319637	-0.0559562	0.253918	-0.178746	-0.120427	0.434065	-0.219619	0.222907	0.36471	0.430899	1
dD1-R, Pd	-0.273191	-0.220691	0.00995506	-0.201092	-0.108214	-0.0843352	0.963942	0.347201	-0.128351	0.26618	-0.496607	-0.613393	-0.340343	-0.166345	1
dD2-R, Pd	-0.239836	-0.204213	0.105046	-0.0398738	-0.161446	0.0899012	0.285882	0.689629	-0.0833809	0.124573	-0.300214	-0.365541	-0.133758	-0.114332	0.274115	1
D1-Pd-D2	0.664965	0.637344	0.27907	0.569279	-0.2493	-0.105909	-0.200061	-0.163137	0.822034	-0.351989	0.410249	0.575818	0.384393	0.390576	-0.179191	-0.131877	1
Q, Pd	-0.148134	-0.191896	-0.545077	-0.509551	-0.00590343	0.0291319	0.218606	-0.183933	-0.352726	0.401884	-0.442603	-0.246597	-0.00235915	-0.0386206	0.184218	-0.145993	-0.214181	1
BE, Au, D1	0.346553	0.361084	0.680518	0.773301	0.10116	0.05355	-0.614508	-0.114266	0.423271	-0.642963	0.858452	0.687296	0.194228	0.261425	-0.566074	-0.126872	0.31992	-0.528028	1
BE, Au, D2	0.23641	0.234855	0.641714	0.678323	-0.0554641	-0.00719377	-0.288114	-0.257036	0.380143	-0.722323	0.770428	0.682253	0.0327514	0.173412	-0.271837	-0.262621	0.36343	-0.247838	0.579809	1

## Sheet: PC loadings (all)
Primary ID	PC1	PC2	PC3
% variation	35.9	15.6	12.6
He8	0.295674	0.183877	-0.306841
nHe8	0.286297	0.14524	-0.317848
BE, Zn	0.212068	-0.451312	0.105925
mean Zn-Cl	0.331911	-0.261297	-0.0216052
dZn-D1	-0.0196765	0.19031	0.12841
dZn-D2	-0.023748	0.0918432	0.0289601
dD1-R, Zn	-0.218527	-0.21989	-0.373908
dD2-R, Zn	-0.116534	-0.354839	-0.18343
D1-Zn-D2	0.312797	-0.0676295	-0.312673
Q, Zn	-0.255512	0.27098	-0.19612
BE, Pd	0.316274	-0.144322	0.297296
mean Pd-Cl	0.343229	0.065505	0.163003
dPd-D1	0.16277	0.305737	-0.169664
dPd-D2	0.185391	0.147671	-0.247767
dD1-R, Pd	-0.20647	-0.242498	-0.376301
dD2-R, Pd	-0.120089	-0.305447	-0.195782
D1-Pd-D2	0.291976	0.00678533	-0.269932
Q, Pd	-0.170468	0.289252	-0.090554

## Sheet: PC scores (all)
Primary ID	D1/D2	sym/asym	bidentate	bridge length	substituent	subs2	PC1	PC2	PC3
cc01	C/C	s	1	3	N_Ar	Ar	3.12443	0.125518	1.39355
cc02	C/C	s	1	6	N_R	R	5.48186	-0.758408	0.415848
cn01	C/N	a	1	2	N_R/Ar	Me/Ar	-0.501276	-0.366768	2.44415
cn02	C/N	a	1	2	N_R/Ar	Me/Ar	-0.551253	-0.112229	2.44106
cn03	C/N	a	1	2	N_R/Ar	Me/Ar	-1.0276	-1.33878	3.17284
cn04	C/N	a	1	3	N_R/Ar	Me/Ar	1.27177	-0.100811	1.0049
cn05	C/N	a	1	3	N_R/Ar	R/Ar	1.65426	-0.340966	0.801964
cn06	C/N	a	1	3	N_R/R	Me	2.36909	-0.0259065	-0.633292
cn07	C/N	a	1	3	N_R/R	Me/R	2.42158	-0.377998	-0.894567
cn08	C/N	a	1	3	N_R/Ar	R/Ar	0.779873	-0.258671	1.1793
cn09	C/N	a	1	3	N_R/Ar	R/Ar	1.96994	-0.7256	1.13567
cn10	C/N	a	1	3	aN_R/Ar	R/Ar	2.3644	0.170291	1.19835
cn11	C/N	a	1	3	N_Ar/Ar	Ar	1.30522	-0.0438696	0.751624
cn12	C/N	a	1	3	N_Ar/Ar	Ar	0.142411	0.347626	0.527058
cn13	C/N	a	1	3	N_Ar/Ar	Ar	-0.0491362	1.50316	-0.173509
cn14	C/N	a	1	3	N_Ar/Ar	Ar	0.00378843	0.881713	0.43
cn15	C/N	a	1	3	N_Ar/Ar	Ar	0.784387	0.474637	-0.0744901
cn16	C/N	a	1	3	N_Ar/Ar	Ar	0.308215	0.285122	0.673005
cn17	C/N	a	1	4	N_R/Ar	Me/Ar	2.04576	-0.206394	0.120887
cn18	C/N	a	1	4	N_R/Ar	R/Ar	3.00392	-0.484055	0.279672
cn19	C/N	a	1	4	N_Ar/Ar	Ar	2.44318	-0.237855	-0.106936
cn20	C/N	a	1	4	N_Ar/Ar	Ar	2.30931	-0.0815243	-0.442008
cn21	C/N	a	1	4	N_Ar/Ar	Ar	1.29079	0.58324	-0.599523
cn22	C/N	a	1	4	N_Ar/Ar	Ar	1.78133	1.28004	-1.73039
cn23	C/N	a	1	4	N_Ar/Ar	Ar	0.622285	1.23689	-0.293962
cn24	C/N	a	1	4	N_Ar/Ar	Ar	2.31245	0.321128	-1.22544
cn25	C/N	a	1	4	N_Ar/Ar	Ar	1.69145	0.320524	-0.716322
cn26	C/N	a	1	4	N_R/Ar	R/Ar	2.41522	0.215202	-0.221566
cn27	C/N	a	1	4	N_R/Ar	R/Ar	2.25186	0.141178	-0.181013
cn28	C/N	a	1	4	N_Ar/Ar	Ar	2.24473	0.29556	-0.663647
cn29	C/N	a	1	5	N_R/Ar	Me/Ar	3.28804	-0.287303	0.0611915
cn30	C/N	a	1	5	N_Ar/Ar	Ar	4.19826	0.478601	-1.91152
cn31	C/N	a	1	3	N_Ar/Ar	Ar	1.64733	0.122694	0.340506
cn32	C/N	a	1	3	N_Ar/Ar	Ar	1.37231	-0.107971	0.750422
cn33	C/N	a	1	3	N_Ar/Ar	Ar	0.617741	1.17762	0.0615681
cn34	C/N	a	1	3	N_Ar/Ar	Ar	0.91714	0.272649	0.582379
cn35	C/N	a	1	4	N_Ar/Ar	Ar	3.19874	-0.249869	-0.664006
cn36	C/N	a	1	4	N_Ar/Ar	Ar	2.52492	-0.294719	-0.0878324
cn37	C/N	a	1	4	N_Ar/Ar	Ar	2.64067	0.788796	-1.12049
cn38	C/N	a	1	4	N_Ar/Ar	Ar	2.36576	0.00341493	-0.194444
co_ch01	C/O	a	1	4	N_R	Me	3.93005	-2.62646	1.08064
co_ch02	C/O	a	1	4	N_R	Me	4.11848	-2.77429	1.25963
co_ch03	C/O	a	1	4	N_R	R	3.77417	-3.26706	0.607586
co_ch04	C/O	a	1	4	N_R	R	3.89185	-2.0649	0.211955
co_ch05	C/O	a	1	4	N_Ar	Ar	3.50925	-2.11678	0.893496
co_ch06	C/O	a	1	4	N_R	Me	3.88606	-2.61316	1.07622
co_ch07	C/O	a	1	4	N_R	Me	3.49705	-2.30737	1.17182
co01	C/O	a	1	3	N_R	Me	-0.136416	-0.242989	1.18243
co02	C/O	a	1	3	N_R/R	R/Me	0.143866	-0.744661	0.489042
cp01	C/P	a	1	3	N_R/R	Me	2.73601	0.12326	1.70777
cp02	C/P	a	1	3	N_R/Ar	Me/Ph	2.3277	0.15524	1.25604
cp03	C/P	a	1	3	N_R/R	Me/R	2.81637	0.184592	1.7406
mcc01	C/C	s	0	0	N_R	Me	5.4518	-0.658801	0.603453
mcc02	C/C	s	0	0	N_R	R	6.46203	-0.543696	-0.756947
mcc03	C/C	s	0	0	N_Ar	Ar	7.56074	0.613677	-3.27055
mcn01	C/N	a	0	0	N_R/Ar	R/Ar	2.95203	-0.47788	-0.264245
mcn02	C/N	a	0	0	N_Ar/Ar	Ar	3.53741	-0.552943	-0.837115
mcn03	N/N	s	0	0	Ar	Ar	-0.119967	-0.271655	-0.928091
mnn01	N/N	a	0	0	N_R/Ar	Me/Ar	2.61677	-0.659656	0.197246
nn_ch01	N/N	s	1	3	R	Me	3.25299	-3.74176	1.23896
nn_ch02	N/N	s	1	3	R	Me	3.20996	-4.23192	0.0155482
nn_ch03	N/N	s	1	3	Ar	Ph	1.42217	-2.23684	-0.233064
nn01	N/N	s	1	1	R	H/Me	-3.84233	0.136708	0.744771
nn02	N/N	s	1	1	R	Me	-3.55686	0.151741	-0.430532
nn03	N/N	s	1	2	R	H	-1.73342	-0.136517	0.67761
nn04	N/N	s	1	2	R	H/Me	-1.77162	-0.341687	-0.224814
nn05	N/N	s	1	2	R	Me	-1.76227	-0.446443	-1.19844
nn06	N/N	s	1	2	R	Me	-1.73584	-0.849698	-1.77667
nn07	N/N	s	1	2	Ar	Ar	-3.08077	-0.566332	1.4367
nn08	N/N	s	1	2	Ar	Ar	-3.00032	-0.440706	1.48772
nn09	N/N	a	1	2	R/Ar	Me	-2.15217	-0.156144	0.202493
nn10	N/N	a	1	2	Ar/R	Ar/Me	-2.94917	0.0319363	1.11232
nn11	N/N	a	1	2	Ar	Ar	-2.97756	-0.0128313	0.75159
nn12	N/N	s	1	2	Ar	Ar	-1.6901	-0.863944	-1.71745
nn13	N/N	a	1	2	R	Me	-2.32792	-0.188501	0.30403
nn14	N/N	s	1	2	R	Me	-3.40303	-0.256893	1.95133
nn15	N/N	s	1	2	R	Me	-2.11156	-0.329682	-2.35021
nn16	N/N	s	1	2	Ar	Ph	-3.00862	0.125378	0.135271
nn17	N/N	s	1	2	Ar	Ar	-2.67438	-1.07859	1.62669
nn18	N/N	s	1	2	Ar	Ar	-2.46457	-1.23504	1.76426
nn19	N/N	s	1	2	Ar	Ar	-2.08172	-0.598641	0.40229
nn20	N/N	s	1	2	Ar	Ar	-1.85636	-0.173786	-0.166321
nn21	N/N	s	1	2	Ar	Ar	-2.30209	-0.571569	0.937886
nn22	N/N	s	1	2	R	R	-2.11937	0.806852	0.394144
nn23	N/N	s	1	2	R	Me/H	-0.943688	-0.934405	-0.336009
nn24	N/N	s	1	2	R	Me/H	-1.03435	-0.982358	-0.445342
nn25	N/N	s	1	2	Ar	Ar	-2.62075	0.134238	-0.889097
nn26	N/N	a	1	2	R	R/H	-2.68623	-0.326367	-1.36196
nn27	N/N	s	1	2	R	Me/H	-1.54307	-1.22609	-0.111735
nn28	N/N	s	1	2	R	Me/H	-1.43966	-1.04494	-0.276607
nn29	N/N	a	1	2	R	R/H	-2.51587	0.928838	-1.39948
nn30	N/N	s	1	2	R	Me/H	-1.45874	-1.23071	0.128396
nn31	N/N	s	1	3	R	Me	0.208419	0.205125	-3.29525
nn32	N/N	s	1	3	R	R	-1.81055	-1.62459	-0.600426
nn33	N/N	s	1	3	R	R	-1.92494	-1.35606	-1.21937
nn34	N/N	s	1	3	R	R	-1.39847	-0.96571	-1.2771
nn35	N/N	s	1	3	R	R	-1.69686	-1.37401	-0.97906
nn36	N/N	s	1	3	R	R	-1.6779	-1.08522	-1.81379
nn37	N/N	s	1	3	R	R	-1.2063	-0.779825	-1.82959
nn38	N/N	s	1	4	R	Me	1.98342	0.741545	-5.24955
nn39	N/N	s	1	4	R	Me	2.17256	0.491148	-5.0039
nn40	N/N	s	1	4	R	Me	1.89296	0.441288	-4.96901
nn41	N/N	s	1	4	R	H	-1.85143	-0.77538	-0.614879
no_ch01	N/O	a	1	2	R	Me	2.03715	-5.9034	0.808481
no_ch02	N/O	a	1	3	R	Me	1.72717	-4.16325	1.31911
no_ch03	N/O	a	1	3	R	Me	2.34798	-3.50901	0.433114
no_ch04	N/O	a	1	3	Ar	Ph	1.23609	-3.19823	-0.716757
no_ch05	N/O	a	1	3	R	Me	0.848893	-4.82228	1.40844
no_ch06	N/O	a	1	3	Ar	Ph	0.401721	-3.45237	-0.239171
no_ch07	N/O	a	1	3	Ar/R	Ph/H	0.60362	-3.18223	-0.497576
no01	N/O	a	1	1	R	Me	-4.76022	1.54528	0.155607
no02	N/O	a	1	2	R	Me	-3.04666	0.222363	-0.847808
no03	N/O	a	1	2	R	Me	-2.84886	0.660981	-1.45196
no04	N/O	a	1	2	R	Me	-3.39071	-0.259903	1.15381
no05	N/O	a	1	2	R	Me	-3.42699	0.117055	-1.22699
no06	N/O	a	1	2	R	Me	-3.90805	0.438533	-1.2933
no07	N/O	a	1	2	R/Ar	Me	-3.43793	-0.55342	0.160511
no08	N/O	a	1	2	R	Me	-2.41083	1.08514	-1.01235
no09	N/O	a	1	2	Ar/R	Ar/H	-4.46972	-0.191057	0.27385
no10	N/O	a	1	2	R	R/H	-5.35094	0.605688	-0.858771
no11	N/O	a	1	2	R	R/H	-5.03023	-0.527637	-1.47112
no12	N/O	a	1	2	R	R/H	-3.64705	0.857641	-0.225403
no13	N/O	a	1	2	R	R/H	-3.38394	0.373021	-0.0684394
no14	N/O	a	1	3	R	Me	-2.40386	-0.172089	-2.15905
no15	N/O	a	1	3	Ar	Ar	-3.59858	-1.79442	0.308225
no16	N/O	a	1	3	Ar	Ar	-2.49643	-1.80307	-0.498999
no17	N/O	a	1	4	R	Me	-1.53399	-0.310551	-2.66504
no18	N/O	a	1	4	R	Me	-1.31704	-0.295677	-2.15422
no19	N/O	a	1	4	R	Me	-1.64249	-0.0270259	-2.10028
no20	N/O	a	1	4	R	Me	-1.83621	0.679896	-3.51068
oo_ch01	O/O	s	1	3	R	H	1.10463	-2.35578	0.180573
oo_ch02	O/O	s	1	3	R	Me	1.13312	-2.48063	0.280024
oo_ch03	O/O	s	1	3	Ar	Ph	0.343436	-2.11437	0.451383
oo_ch04	O/O	a	1	3	R	R/H	0.93613	-2.25171	0.16087
oo_ch05	O/O	a	1	3	R	R/Me	1.00066	-2.38514	0.194014
oo_ch06	O/O	a	1	3	Ar/R	Ph/R	0.494554	-2.1706	0.497792
oo_ch07	O/O	a	1	3	R	Me/H	0.417844	-4.72156	1.30946
oo_ch08	O/O	a	1	3	0	0	-0.892713	-4.13374	0.439078
oo01	O/O	s	1	1	R	Me	-5.58098	1.97601	-0.600442
oo02	O/O	s	1	2	R	Me	-4.33163	0.0921861	-0.891593
oo03	O/O	s	1	2	R	Me	-4.61418	0.780174	-0.674882
oo04	O/O	a	1	2	R	Me	-4.45307	0.767175	-0.0380069
oo05	O/O	a	1	2	Ar/H	Ph/H	-5.05137	-2.64639	-3.37175
oo06	O/O	s	1	3	R	Me	-3.58805	-0.42078	-1.97053
oo07	O/O	s	1	4	R	Me	-3.2578	-0.344212	-2.34513
oo08	O/O	s	1	4	0	0	-3.33033	-1.95859	-1.91828
oo09	O/O	s	1	4	0	0	-3.02645	-1.40241	-2.57176
oo10	O/O	s	1	4	0	0	-4.35889	-2.15746	-1.65186
oo11	O/O	s	1	4	0	0	-3.70556	-2.86588	-1.71006
pn01	P/N	a	1	1	R	Me	-1.77449	0.624067	2.06696
pn02	P/N	a	1	1	Ar/R	Ph/Me	-2.25422	1.42174	1.53448
pn03	P/N	a	1	1	Ar/R	Ph/Me	-3.13616	2.62055	2.18648
pn04	P/N	a	1	1	R	Me	-3.0082	2.08015	2.3005
pn05	P/N	a	1	2	R	Me	0.489327	-0.0219094	1.00088
pn06	P/N	a	1	2	Ar/R	Ph/Me	0.157202	1.17144	-0.0921885
pn07	P/N	a	1	2	R	Me	-0.0670721	-0.475612	0.0422691
pn08	P/N	a	1	2	Ar/R	Ph/Me	-0.707148	0.435425	-0.4811
pn09	P/N	a	1	2	R	Me	-0.631911	0.287887	2.15648
pn10	P/N	a	1	2	Ar/R	Ph/Me	-0.859521	1.50204	1.60889
pn11	P/N	a	1	2	Ar	Ph	-0.852335	1.9274	0.805746
pn12	P/N	a	1	2	R/Ar	Me	-0.715974	0.628852	2.41151
pn13	P/N	a	1	2	Ar/R	Ph/R	-1.20352	1.43637	1.87629
pn14	P/N	a	1	2	R	Me	-0.0188473	-0.274038	1.15602
pn15	P/N	a	1	2	Ar/R	Ph/Me	-0.577345	0.909786	0.565925
pn16	P/N	a	1	2	Ar/R	Ph/H	0.0108278	0.307883	1.68194
pn17	P/N	a	1	2	Ar/R	Ph/HMe	0.111318	-0.0247513	1.3379
pn18	P/N	a	1	2	Ar/R	Ph/H	-0.867955	0.115635	1.62836
pn19	P/N	a	1	2	R/Ar	Me	-0.378452	0.65759	2.20973
pn20	P/N	a	1	2	Ar	Ph/Ar	-0.586374	0.62467	1.95999
pn21	P/N	a	1	2	Ar	Ph/Ar	0.944958	0.500061	0.300349
pn22	P/N	a	1	3	R	Me	2.14234	0.0719869	-0.0644152
pn23	P/N	a	1	3	Ar/R	Ph/Me	1.60974	1.09193	-1.22052
pn24	P/N	a	1	3	Ar/R	Ph/R	0.202969	1.34294	-0.681013
pn25	P/N	a	1	3	Ar/R	Ph/H	0.576689	-0.00428595	1.06533
pn26	P/N	a	1	3	Ar	Ph/Ar	-0.263522	0.937604	1.01163
pn27	P/N	a	1	4	Ar/R	Ph	3.2512	0.872757	-2.45813
pn28	P/N	a	1	4	Ar/R	Ph	2.848	0.696045	-2.23237
pn29	P/N	a	1	4	Ar/R	Ph	2.50156	0.498662	-1.88131
pn30	P/N	a	1	4	Ar/R	Ph	1.85349	0.903493	-2.39632
po_ch_01	P/O	a	1	2	R	Me	2.72432	-4.39382	4.57734
po01	P/O	a	1	1	R	Me	-3.02899	1.06557	1.73359
po02	P/O	a	1	1	Ar/R	Ph/Me	-3.11137	1.75205	1.65541
po03	P/O	a	1	2	R	Me	-1.01696	0.319096	1.48033
po04	P/O	a	1	2	Ar/R	Ph/Me	-1.63321	0.97344	0.417585
po05	P/O	a	1	2	R	Me	-2.16968	0.966064	1.56465
po06	P/O	a	1	2	Ar	Ph	-2.49665	1.71406	1.01511
po07	P/O	a	1	2	Ar/R	Me	-1.36304	0.904874	1.29163
po08	P/O	a	1	2	R	Me	-1.35691	0.974179	1.61552
po09	P/O	a	1	2	Ar/R	Ph/Me	-2.00187	1.38285	0.995402
po10	P/O	a	1	2	R	Me	-4.22028	-1.96771	-3.84317
po11	P/O	a	1	3	R	Me	-0.131717	0.0414852	0.639395
po12	P/O	a	1	3	Ar/R	Ph/Me	-0.868114	0.802812	-0.00562157
po13	P/O	a	1	4	Ar/R	Me	-0.00292078	0.555478	-0.290015
po14	P/O	a	1	4	Ar/R	Me	0.300392	0.639584	-0.887901
po15	P/O	a	1	4	Ar/R	Me	-0.636314	0.447249	0.492502
po16	P/O	a	1	4	Ar/R	Me	-0.546039	0.809374	-0.52742
pp01	P/P	s	1	1	R	Me	-0.718838	2.76744	2.3203
pp02	P/P	s	1	1	Ar	Ph	-0.582612	2.52994	2.07205
pp03	P/P	s	1	1	Ar	Ph	-0.958732	3.02059	2.80634
pp04	P/P	s	1	2	R	Me	1.31206	2.25984	1.96191
pp05	P/P	s	1	2	Ar	Ph	1.13589	2.59101	1.00966
pp06	P/P	s	1	2	R	R	-0.194966	3.40087	0.917723
pp07	P/P	s	1	2	OAr	OPh	0.523705	3.85029	2.7006
pp08	P/P	s	1	2	Ar	Ph	0.668929	2.4828	1.72411
pp09	P/P	s	1	2	Ar	Ph	0.600078	2.46402	1.50337
pp10	P/P	s	1	2	R	R	1.41834	2.34047	2.21071
pp11	P/P	s	1	2	Ar	Ph	0.415965	2.42437	0.378551
pp12	P/P	s	1	3	R	Me	2.77861	1.97516	1.06674
pp13	P/P	s	1	3	Ar	Ph	2.32734	2.19832	0.168682
pp14	P/P	s	1	3	Ar	Ph	0.734963	2.05965	0.661543
pp15	P/P	a	1	3	Ar	Ph	2.85383	2.329	-0.0238992
pp16	P/P	s	1	3	Ar	Ph	3.06342	2.97924	-1.2372
pp17	P/P	s	1	4	R	Me	4.37608	1.24449	0.706331
pp18	P/P	s	1	4	Ar	Ph	2.46396	2.71942	-0.62161
pp19	P/P	s	1	4	Ar	Ph	3.38827	2.30724	-1.14225
pp20	P/P	s	1	4	Ar	Ph	2.57781	2.25774	-0.662218
pp21	P/P	s	1	4	Ar	Ph	2.31964	2.44011	-0.854163
pp22	P/P	s	1	4	Ar	Ph	2.37655	2.63823	-1.25034
pp23	P/P	s	1	4	Ar	Ph	2.45418	2.21714	0.901707
pp24	P/P	s	1	5	Ar	Ph	4.00066	3.04008	-2.53171
pp25	P/P	s	1	5	Ar	Ph	4.35585	3.17081	-2.75551
pp26	P/P	s	1	6	Ar	Ph	4.04364	2.62853	-2.4317
pp27	P/P	s	1	6	Ar	Ph	2.45416	3.13955	-0.55209
pp28	P/P	s	1	6	Ar	Ph	2.35075	3.2324	0.0411997

## Sheet: PC loadings uncharged
Primary ID	M2.p[1]	M2.p[2]	M2.p[3]
% variation	40	14.3	10.2
He8	0.300606	-0.222933	0.217297
nHe8	0.288962	-0.249432	0.174185
BE, Zn	0.201849	-0.130466	-0.491219
mean Zn-Cl	0.326209	-0.164826	-0.152164
dZn-D1	-0.0120127	0.193878	0.2722
dZn-D2	-0.0227475	0.167956	0.200036
dD1-R, Zn	-0.224468	-0.367667	0.0406192
dD2-R, Zn	-0.184911	-0.334741	-0.0208104
D1-Zn-D2	0.289012	-0.329269	0.00585955
Q, Zn	-0.266553	-0.140664	0.1251
BE, Pd	0.300706	0.202083	-0.281941
mean Pd-Cl	0.32322	0.172592	0.0831352
dPd-D1	0.191013	-0.044673	0.451117
dPd-D2	0.203905	-0.117822	0.273804
dD1-R, Pd	-0.212067	-0.381738	-0.0154638
dD2-R, Pd	-0.164277	-0.321905	-0.0657031
D1-Pd-D2	0.277399	-0.238983	0.107489
Q, Pd	-0.131513	0.0984889	0.380959

## Sheet: PC scores (uncharged)
Primary ID	No.	D1/D2	sym/asym	bidentate	count	bridge length	substituent	subs2	M2.t[1]	M2.t[2]	M2.t[3]
cc01	dmle_cc001	C/C	s	1	104	3	N_Ar	Ar	3.85457	1.19006	-1.43271
cc02	dmle_cc007	C/C	s	1	105	6	N_R	R	6.25445	-0.188263	-2.28719
cn01	dmle_cn001	C/N	a	1	106	2	N_R/Ar	Me/Ar	-0.00730469	2.01136	-1.8128
cn02	dmle_cn002.01	C/N	a	1	107	2	N_R/Ar	Me/Ar	-0.103212	2.4084	-1.26426
cn03	dmle_cn013.01	C/N	a	1	118	2	N_R/Ar	Me/Ar	-0.504341	2.20258	-3.08682
cn04	dmle_cn003_n	C/N	a	1	108	3	N_R/Ar	Me/Ar	1.71097	0.583753	-1.49746
cn05	dmle_cn006	C/N	a	1	111	3	N_R/Ar	R/Ar	2.12464	0.0485747	-1.95843
cn06	dmle_cn008	C/N	a	1	113	3	N_R/R	Me	2.81431	-0.741395	-0.234866
cn07	dmle_cn009	C/N	a	1	114	3	N_R/R	Me/R	2.81234	-1.18982	-0.576923
cn08	dmle_cn010	C/N	a	1	115	3	N_R/Ar	R/Ar	1.17112	0.655273	-1.62488
cn09	dmle_cn011	C/N	a	1	116	3	N_R/Ar	R/Ar	2.54224	0.300342	-2.09289
cn10	dmle_cn012	C/N	a	1	117	3	aN_R/Ar	R/Ar	3.04946	0.984723	-1.80798
cn11	dmle_cn014	C/N	a	1	119	3	N_Ar/Ar	Ar	1.74977	0.375089	-1.34794
cn12	dmle_cn040	C/N	a	1	137	3	N_Ar/Ar	Ar	0.405807	0.32309	-0.72677
cn13	dmle_cn056	C/N	a	1	147	3	N_Ar/Ar	Ar	0.0674637	0.263525	0.959317
cn14	dmle_cn058	C/N	a	1	148	3	N_Ar/Ar	Ar	0.212761	0.514221	-0.108092
cn15	dmle_cn060	C/N	a	1	149	3	N_Ar/Ar	Ar	1.01692	-0.343412	-0.536838
cn16	dmle_cn062	C/N	a	1	150	3	N_Ar/Ar	Ar	0.598279	0.422916	-0.845485
cn17	dmle_cn004	C/N	a	1	109	4	N_R/Ar	Me/Ar	2.46861	-0.462068	-1.40219
cn18	dmle_cn007	C/N	a	1	112	4	N_R/Ar	R/Ar	3.5224	-0.390902	-1.8166
cn19	dmle_cn015	C/N	a	1	120	4	N_Ar/Ar	Ar	2.87741	-0.658992	-1.34986
cn20	dmle_cn030	C/N	a	1	125	4	N_Ar/Ar	Ar	2.71611	-0.887887	-1.05104
cn21	dmle_cn042	C/N	a	1	138	4	N_Ar/Ar	Ar	1.55749	-0.756115	-0.195104
cn22	dmle_cn064	C/N	a	1	151	4	N_Ar/Ar	Ar	1.92911	-1.32536	1.33032
cn23	dmle_cn066	C/N	a	1	152	4	N_Ar/Ar	Ar	0.800487	0.153383	0.986704
cn24	dmle_cn068	C/N	a	1	153	4	N_Ar/Ar	Ar	2.56629	-1.32939	-0.102574
cn25	dmle_cn070	C/N	a	1	154	4	N_Ar/Ar	Ar	1.95201	-0.851744	-0.444443
cn26	nf_cn001n	C/N	a	1	133	4	N_R/Ar	R/Ar	2.7512	-0.387668	-0.723878
cn27	nf_cn002	C/N	a	1	134	4	N_R/Ar	R/Ar	2.60062	-0.370517	-0.786558
cn28	nf_cn003	C/N	a	1	135	4	N_Ar/Ar	Ar	2.56244	-0.684992	-0.305765
cn29	dmle_cn005	C/N	a	1	110	5	N_R/Ar	Me/Ar	3.83942	-0.451252	-1.79263
cn30	dmle_cn016	C/N	a	1	121	5	N_Ar/Ar	Ar	4.60165	-1.8831	0.0303828
cn31	dmle_cn047	C/N	a	1	139	3	N_Ar/Ar	Ar	2.05117	0.173554	-0.791887
cn32	dmle_cn048	C/N	a	1	140	3	N_Ar/Ar	Ar	1.8289	0.338307	-1.42126
cn33	dmle_cn049	C/N	a	1	141	3	N_Ar/Ar	Ar	0.839218	0.36918	0.46155
cn34	dmle_cn050	C/N	a	1	142	3	N_Ar/Ar	Ar	1.29021	0.369837	-0.919574
cn35	dmle_cn051	C/N	a	1	143	4	N_Ar/Ar	Ar	3.62862	-1.06647	-0.953322
cn36	dmle_cn052	C/N	a	1	144	4	N_Ar/Ar	Ar	2.9862	-0.641154	-1.42004
cn37	dmle_cn053	C/N	a	1	145	4	N_Ar/Ar	Ar	2.96456	-0.89389	0.643682
cn38	dmle_cn054	C/N	a	1	146	4	N_Ar/Ar	Ar	2.79437	-0.370707	-0.879381
co01	dmle_co012	C/O	a	1	132	3	N_R	Me	0.204041	0.79062	-1.17865
co02	nf_co001	C/O	a	1	136	3	N_R/R	R/Me	0.386435	-0.0727958	-1.00334
cp01	nf_cp001	C/P	a	1	208	3	N_R/R	Me	3.26298	1.40924	-1.73862
cp02	dmle_cp001	C/P	a	1	123	3	N_R/Ar	Me/Ph	2.73982	0.962483	-1.35634
cp03	dmle_cp002	C/P	a	1	124	3	N_R/R	Me/R	3.37212	1.39819	-1.83526
mcc01	dmle_mCL042	C/C	s	0	168	0	N_R	Me	6.19894	-0.158379	-2.45012
mcc02	dmle_mCL057	C/C	s	0	169	0	N_R	R	7.17994	-1.25729	-1.54684
mcc03	dmle_mCL061	C/C	s	0	170	0	N_Ar	Ar	8.22615	-2.77464	0.855081
mcn01	dmle_mcn002	C/N	a	0	172	0	N_R/Ar	R/Ar	3.42429	-0.85032	-1.36925
mcn02	dmle_mcn003	C/N	a	0	173	0	N_Ar/Ar	Ar	4.01987	-1.49137	-1.41579
mcn03	dmle_mNL003	N/N	s	0	175	0	Ar	Ar	0.128186	-1.08791	-0.792426
mnn01	dmle_mcn001	N/N	a	0	171	0	N_R/Ar	Me/Ar	3.07189	-0.590753	-1.86548
nn01	ldnn004b	N/N	s	1	30	1	R	H/Me	-3.50145	0.991964	0.0403767
nn02	ldnn005	N/N	s	1	31	1	R	Me	-3.31916	-0.099184	0.685973
nn03	ldnn007	N/N	s	1	32	2	R	H	-1.31158	0.65508	-1.05329
nn04	ldnn008a	N/N	s	1	33	2	R	H/Me	-1.45565	-0.29254	-0.496313
nn05	ldnn009	N/N	s	1	34	2	R	Me	-1.52	-1.09203	0.236858
nn06	nf_nn002	N/N	s	1	177	2	R	Me	-1.68816	-1.8644	0.116666
nn07	ldnn001	N/N	s	1	28	2	Ar	Ar	-2.83949	1.0858	-1.8159
nn08	ldnn002	N/N	s	1	29	2	Ar	Ar	-2.73835	1.22053	-1.64786
nn09	nf_nn004	N/N	a	1	179	2	R/Ar	Me	-1.87231	0.0752074	-0.7052
nn10	ldnn014	N/N	a	1	36	2	Ar/R	Ar/Me	-2.73639	1.04981	-1.10114
nn11	ldnn015	N/N	a	1	37	2	Ar	Ar	-2.78751	0.675275	-0.994405
nn12	ldnn016	N/N	s	1	38	2	Ar	Ar	-1.50634	-1.8093	0.0492127
nn13	nf_nn003	N/N	a	1	178	2	R	Me	-2.04425	0.182278	-0.740451
nn14	ldnn019	N/N	s	1	39	2	R	Me	-3.16419	1.68159	-1.8296
nn15	ldnn023	N/N	s	1	40	2	R	Me	-2.05043	-2.13098	0.892299
nn16	ldnn025	N/N	s	1	77	2	Ar	Ph	-2.90655	0.126065	-0.581425
nn17	ldnn026	N/N	s	1	78	2	Ar	Ar	-2.44303	0.947138	-2.51576
nn18	ldnn027	N/N	s	1	79	2	Ar	Ar	-2.18578	1.0063	-2.72166
nn19	ldnn028	N/N	s	1	80	2	Ar	Ar	-1.8024	-0.0292815	-1.55027
nn20	ldnn029	N/N	s	1	81	2	Ar	Ar	-1.64483	-0.418077	-1.09049
nn21	ldnn030	N/N	s	1	82	2	Ar	Ar	-2.10611	0.525652	-1.81506
nn22	ldnn032	N/N	s	1	84	2	R	R	-1.94348	0.681861	-0.197387
nn23	ldnn063a	N/N	s	1	94	2	R	Me/H	-0.653161	-0.693763	-1.25448
nn24	ldnn063b	N/N	s	1	95	2	R	Me/H	-0.729842	-0.832568	-1.24449
nn25	ldnn068	N/N	s	1	96	2	Ar	Ar	-2.65544	-0.81573	-0.0986909
nn26	dmlo_nn004b	N/N	a	1	156	2	R	R/H	-2.58324	-1.27467	0.265855
nn27	dmlo_nn005	N/N	s	1	158	2	R	Me/H	-1.29923	-0.711202	-1.6766
nn28	dmlo_nn006	N/N	s	1	159	2	R	Me/H	-1.24546	-0.807948	-1.37025
nn29	dmlo_nn008b	N/N	a	1	160	2	R	R/H	-2.39118	-0.951769	1.53242
nn30	dmlo_nn010b	N/N	s	1	161	2	R	Me/H	-1.18302	-0.484456	-1.72751
nn31	ldnn011	N/N	s	1	35	3	R	Me	0.381621	-2.89603	1.42848
nn32	ldnn045	N/N	s	1	85	3	R	R	-1.72943	-1.40475	-2.06047
nn33	ldnn046	N/N	s	1	86	3	R	R	-1.92469	-1.87131	-1.43326
nn34	ldnn047	N/N	s	1	87	3	R	R	-1.36364	-1.77554	-1.31154
nn35	ldnn048	N/N	s	1	88	3	R	R	-1.67131	-1.67993	-1.85605
nn36	ldnn049	N/N	s	1	89	3	R	R	-1.72035	-2.32316	-1.01181
nn37	ldnn050	N/N	s	1	90	3	R	R	-1.21911	-2.22049	-0.989314
nn38	nf_nn001	N/N	s	1	176	4	R	Me	2.0988	-4.56024	2.57301
nn39	nf_nn005_cis	N/N	s	1	180	4	R	Me	2.29126	-4.44643	2.252
nn40	nf_nn006	N/N	s	1	182	4	R	Me	1.95372	-4.5034	2.06973
nn41	ldnn031	N/N	s	1	83	4	R	H	-1.75271	-0.703901	-0.41777
no01	ldno002	N/O	a	1	59	1	R	Me	-4.3764	1.26881	1.61678
no02	ldno004	N/O	a	1	60	2	R	Me	-2.83884	-0.442503	0.683396
no03	ldno005	N/O	a	1	61	2	R	Me	-2.76666	-0.736153	1.51426
no04	nf_no004	N/O	a	1	187	2	R	Me	-3.22666	1.06925	-1.20759
no05	nf_no003	N/O	a	1	186	2	R	Me	-3.28064	-0.693061	0.73244
no06	ldno009	N/O	a	1	63	2	R	Me	-3.73533	-0.635495	1.12405
no07	nf_no005	N/O	a	1	188	2	R/Ar	Me	-3.40506	-0.0125729	-0.818346
no08	ldno010	N/O	a	1	64	2	R	Me	-2.13962	-0.614018	1.27173
no09	ldno016	N/O	a	1	65	2	Ar/R	Ar/H	-4.53326	0.193879	-0.492205
no10	dmlo_no002a	N/O	a	1	n1	2	R	R/H	-5.30516	0.312658	1.98478
no11	dmlo_no002b	N/O	a	1	155	2	R	R/H	-5.08106	-1.2591	0.641398
no12	dmlo_no003a	N/O	a	1	157	2	R	R/H	-3.58411	0.385255	0.641363
no13	dmlo_no003b	N/O	a	1	n2	2	R	R/H	-3.27751	0.146307	0.387869
no14	ldno007	N/O	a	1	62	3	R	Me	-2.29647	-1.98239	0.795507
no15	dmlo_no004	N/O	a	1	164	3	Ar	Ar	-3.6893	-0.697545	-2.08624
no16	dmlo_no005	N/O	a	1	165	3	Ar	Ar	-2.50382	-1.49013	-1.52184
no17	nf_no002	N/O	a	1	185	4	R	Me	-1.52334	-2.70712	0.575526
no18	nf_no006_cis	N/O	a	1	189	4	R	Me	-1.19448	-1.95761	0.475984
no19	nf_no007	N/O	a	1	190	4	R	Me	-1.58002	-1.92353	0.721712
no20	nf_no008	N/O	a	1	191	4	R	Me	-1.85988	-2.86024	2.42196
oo01	nf_oo001	O/O	s	1	193	1	R	Me	-5.39529	0.776677	2.80824
oo02	nf_oo002	O/O	s	1	194	2	R	Me	-4.30073	-0.569978	0.724688
oo03	nf_oo005	O/O	s	1	197	2	R	Me	-4.57146	-0.0423917	1.28062
oo04	ldoo009	O/O	a	1	41	2	R	Me	-4.30234	0.459011	0.721005
oo05	ldoo010	O/O	a	1	n	2	Ar/H	Ph/H	-5.55255	-4.19361	-0.26415
oo06	nf_oo003	O/O	s	1	195	3	R	Me	-3.63275	-1.9614	0.306736
oo07	nf_oo004	O/O	s	1	196	4	R	Me	-3.36452	-2.20891	0.698581
oo08	dmlo_oo003	O/O	s	1	162	4	0	0	-3.31247	-2.57132	-1.05033
oo09	dmlo_oo004	O/O	s	1	163	4	0	0	-3.11212	-2.95199	-0.29713
oo10	dmlo_oo005	O/O	s	1	166	4	0	0	-4.38869	-2.42229	-1.27808
oo11	dmlo_oo006	O/O	s	1	167	4	0	0	-3.72254	-2.86326	-2.05134
pn01	nf_pn006	P/N	a	1	212	1	R	Me	-1.63518	1.99498	0.184536
pn02	ldpn001	P/N	a	1	43	1	Ar/R	Ph/Me	-2.0251	2.03072	1.36368
pn03	ldpn002	P/N	a	1	44	1	Ar/R	Ph/Me	-2.80579	3.07089	2.03663
pn04	nf_pn005	P/N	a	1	211	1	R	Me	-2.75344	2.91484	1.49144
pn05	nf_pn009	P/N	a	1	215	2	R	Me	0.639101	0.673101	-0.61142
pn06	ldpn003	P/N	a	1	45	2	Ar/R	Ph/Me	0.373751	0.215856	1.08897
pn07	nf_pn007	P/N	a	1	213	2	R	Me	-0.153885	-0.329734	-0.0303489
pn08	ldpn004	P/N	a	1	46	2	Ar/R	Ph/Me	-0.692783	-0.266702	1.30638
pn09	nf_pn008	P/N	a	1	214	2	R	Me	-0.443683	1.78429	-1.05864
pn10	ldpn005	P/N	a	1	47	2	Ar/R	Ph/Me	-0.560501	1.89412	0.41874
pn11	ldpn006	P/N	a	1	48	2	Ar	Ph	-0.647574	1.35897	1.23476
pn12	nf_pn013	P/N	a	1	219	2	R/Ar	Me	-0.525337	2.03585	-0.925581
pn13	ldpn007	P/N	a	1	49	2	Ar/R	Ph/R	-0.910981	1.97347	0.270272
pn14	nf_pn010	P/N	a	1	216	2	R	Me	-0.0161038	0.702225	-0.741172
pn15	ldpn011	P/N	a	1	52	2	Ar/R	Ph/Me	-0.4181	0.868028	0.693647
pn16	ldpn014	P/N	a	1	73	2	Ar/R	Ph/H	0.295689	1.39201	-0.894905
pn17	ldpn015	P/N	a	1	74	2	Ar/R	Ph/HMe	0.330021	0.91549	-0.877341
pn18	ldpn016	P/N	a	1	75	2	Ar/R	Ph/H	-0.767851	1.34855	-0.525462
pn19	nf_pn012	P/N	a	1	218	2	R/Ar	Me	-0.18856	1.90917	-0.831927
pn20	ldpn019	P/N	a	1	76	2	Ar	Ph/Ar	-0.385354	1.68951	-0.726313
pn21	ldpn028	P/N	a	1	102	2	Ar	Ph/Ar	1.09879	0.151222	-0.390686
pn22	nf_pn011	P/N	a	1	217	3	R	Me	2.29538	-0.398934	-0.325877
pn23	ldpn008	P/N	a	1	50	3	Ar/R	Ph/Me	1.81697	-0.887767	1.31578
pn24	ldpn009	P/N	a	1	51	3	Ar/R	Ph/R	0.353942	-0.533918	1.09479
pn25	ldpn022	P/N	a	1	101	3	Ar/R	Ph/H	0.780141	0.556723	-1.17437
pn26	ldpn030	P/N	a	1	103	3	Ar	Ph/Ar	-0.107257	0.914837	-0.00859598
pn27	nf_pn001	P/N	a	1	198	4	Ar/R	Ph	3.35315	-2.22942	1.57223
pn28	nf_pn002_cis	P/N	a	1	199	4	Ar/R	Ph	2.96408	-1.95678	1.6109
pn29	nf_pn003	P/N	a	1	201	4	Ar/R	Ph	2.60033	-1.75002	1.22072
pn30	nf_pn004	P/N	a	1	202	4	Ar/R	Ph	1.85927	-2.10928	1.99103
po01	nf_po006	P/O	a	1	220	1	R	Me	-2.8829	2.01295	0.877005
po02	ldpo002	P/O	a	1	53	1	Ar/R	Ph/Me	-2.89368	2.20345	1.48357
po03	nf_po007	P/O	a	1	221	2	R	Me	-0.875163	1.37711	-0.266205
po04	ldpo004	P/O	a	1	54	2	Ar/R	Ph/Me	-1.44417	0.714804	0.995232
po05	nf_po010	P/O	a	1	224	2	R	Me	-2.12547	1.63298	0.281999
po06	ldpo005	P/O	a	1	55	2	Ar	Ph	-2.38385	1.54181	1.32537
po07	nf_po002	P/O	a	1	204	2	Ar/R	Me	-1.20013	1.62296	0.546047
po08	nf_po009	P/O	a	1	223	2	R	Me	-1.15769	1.9754	0.295149
po09	ldpo009	P/O	a	1	57	2	Ar/R	Ph/Me	-1.74427	1.71207	1.20026
po10	ldpo010	P/O	a	1	n	2	R	Me	-4.12929	-4.01994	0.732297
po11	nf_po011	P/O	a	1	225	3	R	Me	0.0264418	0.283176	-0.397933
po12	ldpo007	P/O	a	1	56	3	Ar/R	Ph/Me	-0.686333	0.135876	0.829314
po13	nf_po001	P/O	a	1	203	4	Ar/R	Me	0.0989984	-0.428198	0.403113
po14	nf_po003	P/O	a	1	205	4	Ar/R	Me	0.339991	-0.868556	1.06666
po15	nf_po004	P/O	a	1	206	4	Ar/R	Me	-0.556739	0.259901	0.113509
po16	nf_po005	P/O	a	1	207	4	Ar/R	Me	-0.544554	-0.537756	1.0669
pp01	ldpp001	P/P	s	1	1	1	R	Me	-0.194251	3.61851	1.57957
pp02	ldpp002	P/P	s	1	2	1	Ar	Ph	-0.0758436	3.1869	1.55712
pp03	ldpp003	P/P	s	1	3	1	Ar	Ph	-0.398546	4.06977	1.56342
pp04	ldpp004	P/P	s	1	4	2	R	Me	1.87557	2.9459	0.670097
pp05	ldpp005	P/P	s	1	5	2	Ar	Ph	1.6162	2.1161	1.49106
pp06	ldpp006	P/P	s	1	6	2	R	R	0.0688277	2.29483	1.96784
pp07	ldpp007	P/P	s	1	7	2	OAr	OPh	1.02735	4.42114	2.04377
pp08	ldpp008	P/P	s	1	8	2	Ar	Ph	1.13757	2.68382	0.931375
pp09	ldpp009	P/P	s	1	9	2	Ar	Ph	1.06964	2.42239	0.934804
pp10	ldpp010	P/P	s	1	10	2	R	R	1.93504	2.98659	0.279896
pp11	ldpp011	P/P	s	1	11	2	Ar	Ph	0.731473	1.50245	1.84169
pp12	ldpp012	P/P	s	1	12	3	R	Me	3.38955	1.84518	0.274658
pp13	ldpp013	P/P	s	1	13	3	Ar	Ph	2.861	1.03574	1.09124
pp14	ldpp014	P/P	s	1	14	3	Ar	Ph	0.991567	1.22513	0.735678
pp15	ldpp028	P/P	a	1	27	3	Ar	Ph	3.4542	0.850031	1.06896
pp16	ldpp027	P/P	s	1	26	3	Ar	Ph	3.61197	0.157565	2.48327
pp17	nf_pp001	P/P	s	1	226	4	R	Me	4.96469	1.14984	-0.349187
pp18	ldpp015	P/P	s	1	15	4	Ar	Ph	2.94624	0.586278	2.08456
pp19	ldpp016	P/P	s	1	16	4	Ar	Ph	3.91	-0.0685944	1.76323
pp20	ldpp017	P/P	s	1	17	4	Ar	Ph	3.02096	0.421518	1.79009
pp21	ldpp018	P/P	s	1	18	4	Ar	Ph	2.74702	0.247977	1.89289
pp22	ldpp019	P/P	s	1	19	4	Ar	Ph	2.75664	-0.0299412	2.25985
pp23	ldpp020	P/P	s	1	20	4	Ar	Ph	3.0421	1.95115	1.01786
pp24	ldpp021	P/P	s	1	21	5	Ar	Ph	4.44282	-0.93019	3.12828
pp25	ldpp022	P/P	s	1	22	5	Ar	Ph	4.92401	-1.13009	3.22941
pp26	ldpp023	P/P	s	1	23	6	Ar	Ph	4.5739	-1.02223	2.42808
pp27	ldpp024	P/P	s	1	24	6	Ar	Ph	2.87856	1.11573	2.45202
pp28	ldpp025	P/P	s	1	25	6	Ar	Ph	2.83095	1.67937	2.45203

## Sheet: PC loadings (C, N, O)
Primary ID	M3.p[1]	M3.p[2]	M3.p[3]	M3.p[4]
% variation	43.3	13.5	11.1	7.9
He8	0.249677	0.372478	-0.0431945	-0.192102
nHe8	0.24768	0.360288	-0.0471063	-0.228182
BE, Zn	0.27865	-0.344826	-0.118651	0.134986
mean Zn-Cl	0.329908	-0.132593	-0.118174	0.0241385
dZn-D1	0.0282725	0.295974	0.108887	0.428722
dZn-D2	-0.00785895	0.0104889	0.0230074	0.560398
dD1-R, Zn	-0.246932	0.0593507	-0.406597	-0.0804229
dD2-R, Zn	-0.0715067	-0.148315	-0.549703	0.103822
D1-Zn-D2	0.288244	0.167092	-0.182272	-0.228007
Q, Zn	-0.243439	0.342667	0.132384	-0.0973267
BE, Pd	0.3117	-0.240222	0.130987	0.0875837
mean Pd-Cl	0.339963	-0.111473	-0.0374487	-0.0192601
dPd-D1	0.144885	0.40846	-0.164264	0.305996
dPd-D2	0.163236	0.259675	-0.158734	0.376242
dD1-R, Pd	-0.255102	0.0511256	-0.368068	-0.050625
dD2-R, Pd	-0.0779904	-0.11744	-0.414616	0.102366
D1-Pd-D2	0.249562	0.101163	-0.241771	-0.241514
Q, Pd	-0.294488	0.0731557	0.0258777	-0.0326595

## Sheet: PC scores (C, N, O)
Primary ID	No.	D1/D2	sym/asym	bidentate	count	bridge length	substituent	subs2	Class	M3.t[1]	M3.t[2]	M3.t[3]	M3.t[4]
cc01	dmle_cc001	C/C	s	1	104	3	N_Ar	Ar	1	3.51098	0.348958	1.99145	1.44554
cc02	dmle_cc007	C/C	s	1	105	6	N_R	R	1	5.68578	0.240985	0.953108	-0.435082
cn01	dmle_cn001	C/N	a	1	106	2	N_R/Ar	Me/Ar	2	0.0408339	-1.291	1.99014	1.6083
cn02	dmle_cn002.01	C/N	a	1	107	2	N_R/Ar	Me/Ar	2	0.0426454	-1.56971	1.97892	3.57256
cn03	dmle_cn013.01	C/N	a	1	118	2	N_R/Ar	Me/Ar	2	-0.346502	-2.58455	1.91767	2.08075
cn04	dmle_cn003_n	C/N	a	1	108	3	N_R/Ar	Me/Ar	2	1.70309	-0.159488	1.48393	0.175699
cn05	dmle_cn006	C/N	a	1	111	3	N_R/Ar	R/Ar	2	2.01858	-0.0795082	1.31809	-0.931324
cn06	dmle_cn008	C/N	a	1	113	3	N_R/R	Me	2	2.7004	0.965422	-0.463609	1.05364
cn07	dmle_cn009	C/N	a	1	114	3	N_R/R	Me/R	2	2.78569	0.89936	-0.598351	0.970855
cn08	dmle_cn010	C/N	a	1	115	3	N_R/Ar	R/Ar	2	1.26186	-0.35028	1.43098	0.355797
cn09	dmle_cn011	C/N	a	1	116	3	N_R/Ar	R/Ar	2	2.3916	-0.32117	1.0259	0.306938
cn10	dmle_cn012	C/N	a	1	117	3	aN_R/Ar	R/Ar	2	2.64132	0.0232617	2.37644	-0.121266
cn11	dmle_cn014	C/N	a	1	119	3	N_Ar/Ar	Ar	2	1.69467	0.0951777	1.41915	0.108161
cn12	dmle_cn040	C/N	a	1	137	3	N_Ar/Ar	Ar	2	0.566551	0.502078	1.39539	0.319845
cn13	dmle_cn056	C/N	a	1	147	3	N_Ar/Ar	Ar	2	0.364541	1.82383	1.52248	1.36145
cn14	dmle_cn058	C/N	a	1	148	3	N_Ar/Ar	Ar	2	0.415834	0.849683	1.62083	0.542157
cn15	dmle_cn060	C/N	a	1	149	3	N_Ar/Ar	Ar	2	1.13339	1.07747	1.10241	-0.48695
cn16	dmle_cn062	C/N	a	1	150	3	N_Ar/Ar	Ar	2	0.743545	0.396282	1.44114	0.357818
cn17	dmle_cn004	C/N	a	1	109	4	N_R/Ar	Me/Ar	2	2.3771	0.606704	0.951458	-0.72384
cn18	dmle_cn007	C/N	a	1	112	4	N_R/Ar	R/Ar	2	3.27625	0.224134	0.935878	-0.989676
cn19	dmle_cn015	C/N	a	1	120	4	N_Ar/Ar	Ar	2	2.72911	0.636111	0.769117	-0.712564
cn20	dmle_cn030	C/N	a	1	125	4	N_Ar/Ar	Ar	2	2.55285	0.988018	0.645653	-0.850868
cn21	dmle_cn042	C/N	a	1	138	4	N_Ar/Ar	Ar	2	1.55297	1.65548	0.84117	-0.751873
cn22	dmle_cn064	C/N	a	1	151	4	N_Ar/Ar	Ar	2	1.97438	2.85499	0.410204	0.550183
cn23	dmle_cn066	C/N	a	1	152	4	N_Ar/Ar	Ar	2	1.07329	1.99877	0.99298	1.721
cn24	dmle_cn068	C/N	a	1	153	4	N_Ar/Ar	Ar	2	2.49772	1.78894	0.24274	-0.557932
cn25	dmle_cn070	C/N	a	1	154	4	N_Ar/Ar	Ar	2	1.95279	1.29011	0.639841	-0.421854
cn26	nf_cn001n	C/N	a	1	133	4	N_R/Ar	R/Ar	2	2.77481	0.743917	0.825655	0.170584
cn27	nf_cn002	C/N	a	1	134	4	N_R/Ar	R/Ar	2	2.6245	0.682374	0.785837	0.398322
cn28	nf_cn003	C/N	a	1	135	4	N_Ar/Ar	Ar	2	2.57492	1.11374	0.455166	0.573053
cn29	dmle_cn005	C/N	a	1	110	5	N_R/Ar	Me/Ar	2	3.51685	0.701572	1.33413	-1.3447
cn30	dmle_cn016	C/N	a	1	121	5	N_Ar/Ar	Ar	2	4.2392	2.49106	0.0598785	-1.36612
cn31	dmle_cn047	C/N	a	1	139	3	N_Ar/Ar	Ar	2	2.03858	0.428009	1.06146	0.857922
cn32	dmle_cn048	C/N	a	1	140	3	N_Ar/Ar	Ar	2	1.75847	0.0688048	1.38047	0.0548217
cn33	dmle_cn049	C/N	a	1	141	3	N_Ar/Ar	Ar	2	1.0272	1.29503	1.55226	1.34099
cn34	dmle_cn050	C/N	a	1	142	3	N_Ar/Ar	Ar	2	1.28658	0.31405	1.43555	0.248405
cn35	dmle_cn051	C/N	a	1	143	4	N_Ar/Ar	Ar	2	3.40894	1.009	0.314903	-0.406292
cn36	dmle_cn052	C/N	a	1	144	4	N_Ar/Ar	Ar	2	2.79649	0.597405	0.764097	-0.722369
cn37	dmle_cn053	C/N	a	1	145	4	N_Ar/Ar	Ar	2	2.85352	2.0638	0.485715	0.876168
cn38	dmle_cn054	C/N	a	1	146	4	N_Ar/Ar	Ar	2	2.62709	0.636834	0.756902	-0.162931
co_ch01	dmle_co003_ch	C/O	a	1	122	4	N_R	Me	3	4.42103	-1.64427	-0.456117	0.779491
co_ch02	dmle_co004_ch	C/O	a	1	126	4	N_R	Me	3	4.58547	-1.79446	-0.555535	1.01623
co_ch03	dmle_co005_ch	C/O	a	1	127	4	N_R	R	3	4.35214	-1.85311	-1.4253	1.04506
co_ch04	dmle_co006_ch	C/O	a	1	128	4	N_R	R	3	4.2996	-0.457427	-0.735187	0.908042
co_ch05	dmle_co008_ch_n	C/O	a	1	129	4	N_Ar	Ar	3	3.98024	-1.09152	-0.261898	1.03803
co_ch06	dmle_co009_ch	C/O	a	1	130	4	N_R	Me	3	4.37269	-1.62927	-0.509219	0.820939
co_ch07	dmle_co010_ch	C/O	a	1	131	4	N_R	Me	3	3.98623	-1.53041	-0.390436	1.16837
co01	dmle_co012	C/O	a	1	132	3	N_R	Me	3	0.361198	-0.484071	1.32645	0.510278
co02	nf_co001	C/O	a	1	136	3	N_R/R	R/Me	3	0.689557	-0.448756	-0.0778403	0.95119
mcc01	dmle_mCL042	C/C	s	0	168	0	N_R	Me	1	5.76106	0.466395	1.39594	0.126081
mcc02	dmle_mCL057	C/C	s	0	169	0	N_R	R	1	6.59514	1.40138	0.221877	0.0283802
mcc03	dmle_mCL061	C/C	s	0	170	0	N_Ar	Ar	1	7.33511	3.81321	-1.05651	-0.981229
mcn01	dmle_mcn002	C/N	a	0	172	0	N_R/Ar	R/Ar	2	3.23683	0.702254	0.330744	-0.290255
mcn02	dmle_mcn003	C/N	a	0	173	0	N_Ar/Ar	Ar	2	3.70844	0.993992	0.0840561	-1.13254
mcn03	dmle_mNL003	N/N	s	0	175	0	Ar	Ar	5	0.0724954	0.472906	0.150091	-0.586942
mnn01	dmle_mcn001	N/N	a	0	171	0	N_R/Ar	Me/Ar	2	2.9978	0.247729	0.655822	-0.405537
nn_ch01	nf_nn007_ch	N/N	s	1	183	3	R	Me	5	3.38274	-3.30615	0.230105	-3.11672
nn_ch02	ldnn051_ch	N/N	s	1	92	3	R	Me	5	3.57548	-2.35596	-3.34851	1.06423
nn_ch03	ldnn053_ch	N/N	s	1	93	3	Ar	Ph	5	1.71511	-0.732615	-1.16626	0.876795
nn01	ldnn004b	N/N	s	1	30	1	R	H/Me	5	-3.69015	-0.335807	1.02433	1.30849
nn02	ldnn005	N/N	s	1	31	1	R	Me	5	-3.53136	0.428715	0.0432805	1.07102
nn03	ldnn007	N/N	s	1	32	2	R	H	5	-1.69668	-0.587399	1.37395	-0.421054
nn04	ldnn008a	N/N	s	1	33	2	R	H/Me	5	-1.75863	-0.205361	0.0634326	-0.0438269
nn05	ldnn009	N/N	s	1	34	2	R	Me	5	-1.82146	0.458486	-1.06441	0.49794
nn06	nf_nn002	N/N	s	1	177	2	R	Me	5	-1.51267	0.784362	-1.56324	0.0847375
nn07	ldnn001	N/N	s	1	28	2	Ar	Ar	5	-2.9649	-1.63349	1.86761	-0.987772
nn08	ldnn002	N/N	s	1	29	2	Ar	Ar	5	-2.86471	-1.51411	1.93003	-0.714495
nn09	nf_nn004	N/N	a	1	179	2	R/Ar	Me	5	-1.89074	0.115529	0.883864	-0.328019
nn10	ldnn014	N/N	a	1	36	2	Ar/R	Ar/Me	5	-2.86149	-0.88627	2.0813	-1.06273
nn11	ldnn015	N/N	a	1	37	2	Ar	Ar	5	-2.89741	-0.78187	1.75069	-0.950329
nn12	ldnn016	N/N	s	1	38	2	Ar	Ar	5	-1.82661	0.373466	-1.72549	-0.036139
nn13	nf_nn003	N/N	a	1	178	2	R	Me	5	-2.06278	0.00240643	0.925792	-0.371261
nn14	ldnn019	N/N	s	1	39	2	R	Me	5	-3.1986	-1.63651	2.60728	-0.563342
nn15	ldnn023	N/N	s	1	40	2	R	Me	5	-2.30455	1.09453	-1.79575	-0.410562
nn16	ldnn025	N/N	s	1	77	2	Ar	Ph	5	-2.82808	-0.0741777	1.43493	-0.878965
nn17	ldnn026	N/N	s	1	78	2	Ar	Ar	5	-2.31604	-1.91006	1.80662	-1.01459
nn18	ldnn027	N/N	s	1	79	2	Ar	Ar	5	-2.09806	-2.07814	1.81445	-0.976264
nn19	ldnn028	N/N	s	1	80	2	Ar	Ar	5	-1.80219	-0.698898	1.01641	-0.764312
nn20	ldnn029	N/N	s	1	81	2	Ar	Ar	5	-1.67204	-0.0898461	1.12626	-1.56509
nn21	ldnn030	N/N	s	1	82	2	Ar	Ar	5	-2.05648	-1.10007	1.78381	-1.56457
nn22	ldnn032	N/N	s	1	84	2	R	R	5	-1.87312	0.47865	2.29899	-1.07689
nn23	ldnn063a	N/N	s	1	94	2	R	Me/H	5	-0.58776	-0.21605	-0.194443	0.334111
nn24	ldnn063b	N/N	s	1	95	2	R	Me/H	5	-0.676621	-0.240203	-0.417315	0.60095
nn25	ldnn068	N/N	s	1	96	2	Ar	Ar	5	-2.44184	0.598704	0.556329	-0.501791
nn26	dmlo_nn004b	N/N	a	1	156	2	R	R/H	5	-2.44621	1.08534	-0.700973	0.0383465
nn27	dmlo_nn005	N/N	s	1	158	2	R	Me/H	5	-1.20163	-0.681499	-0.0877653	-0.458889
nn28	dmlo_nn006	N/N	s	1	159	2	R	Me/H	5	-1.08748	-0.459296	-0.130493	-0.583279
nn29	dmlo_nn008b	N/N	a	1	160	2	R	R/H	5	-2.25877	2.69716	0.0422681	0.565601
nn30	dmlo_nn010b	N/N	s	1	161	2	R	Me/H	5	-1.07705	-0.786741	-0.00424892	-0.142746
nn31	ldnn011	N/N	s	1	35	3	R	Me	5	-0.0748868	2.19642	-2.33903	-0.494441
nn32	ldnn045	N/N	s	1	85	3	R	R	5	-1.63074	-1.04577	-0.345485	-2.13588
nn33	ldnn046	N/N	s	1	86	3	R	R	5	-1.79302	-0.458896	-0.610604	-2.32014
nn34	ldnn047	N/N	s	1	87	3	R	R	5	-1.31531	-0.161559	-0.286857	-2.6763
nn35	ldnn048	N/N	s	1	88	3	R	R	5	-1.57966	-0.717728	-0.289238	-2.84599
nn36	ldnn049	N/N	s	1	89	3	R	R	5	-1.64617	0.0787479	-0.745194	-2.87801
nn37	ldnn050	N/N	s	1	90	3	R	R	5	-1.20921	0.277309	-0.429971	-3.29269
nn38	nf_nn001	N/N	s	1	176	4	R	Me	5	1.81761	4.32203	-3.33307	-0.541994
nn39	nf_nn005_cis	N/N	s	1	180	4	R	Me	5	2.02733	3.984	-3.42297	-0.429007
nn40	nf_nn006	N/N	s	1	182	4	R	Me	5	1.74694	3.79622	-3.33601	-0.893168
nn41	ldnn031	N/N	s	1	83	4	R	H	5	-1.49363	-0.0516957	-0.647069	0.0661934
no_ch01	nf_no010_ch	N/O	a	1	209	2	R	Me	6	2.57118	-3.90544	-3.75401	2.197
no_ch02	nf_no009_ch	N/O	a	1	192	3	R	Me	6	2.03583	-3.71666	-0.446907	-2.9464
no_ch03	ldno023_chO	N/O	a	1	97	3	R	Me	6	2.51351	-3.09041	-0.805567	-0.640651
no_ch04	ldno025_chO	N/O	a	1	98	3	Ar	Ph	6	1.35879	-2.1444	-1.62799	-0.35091
no_ch05	nf_no011_ch	N/O	a	1	210	3	R	Me	6	1.33846	-4.76078	-1.42937	0.224419
no_ch06	ldno032_ch	N/O	a	1	99	3	Ar	Ph	6	0.634913	-2.60934	-1.51684	-0.319692
no_ch07	ldno021_ch	N/O	a	1	91	3	Ar/R	Ph/H	6	0.814851	-2.19093	-1.54671	-0.382934
no01	ldno002	N/O	a	1	59	1	R	Me	6	-4.67499	1.17473	1.67179	2.31167
no02	ldno004	N/O	a	1	60	2	R	Me	6	-3.01305	0.63295	-0.213838	0.684999
no03	ldno005	N/O	a	1	61	2	R	Me	6	-2.81791	1.21183	-0.681785	-0.165218
no04	nf_no004	N/O	a	1	187	2	R	Me	6	-2.92906	-1.14304	1.77636	0.407274
no05	nf_no003	N/O	a	1	186	2	R	Me	6	-3.26084	0.977534	-0.28628	0.605719
no06	ldno009	N/O	a	1	63	2	R	Me	6	-4.01185	1.03	-0.231215	0.114231
no07	nf_no005	N/O	a	1	188	2	R/Ar	Me	6	-3.02831	-0.767428	0.589084	0.269718
no08	ldno010	N/O	a	1	64	2	R	Me	6	-2.46453	1.89467	0.257797	0.0505879
no09	ldno016	N/O	a	1	65	2	Ar/R	Ar/H	6	-4.23599	-1.01788	0.91248	0.349324
no10	dmlo_no002a	N/O	a	1	n1	2	R	R/H	6	-5.06336	1.36056	0.161914	3.26563
no11	dmlo_no002b	N/O	a	1	155	2	R	R/H	6	-4.81848	0.922355	-0.941124	0.683262
no12	dmlo_no003a	N/O	a	1	157	2	R	R/H	6	-3.27792	0.641048	1.24408	0.497276
no13	dmlo_no003b	N/O	a	1	n2	2	R	R/H	6	-2.97749	0.453434	0.679145	0.505897
no14	ldno007	N/O	a	1	62	3	R	Me	6	-2.46863	1.06587	-1.57743	0.0673646
no15	dmlo_no004	N/O	a	1	164	3	Ar	Ar	6	-3.11113	-1.76332	-0.235426	-1.02161
no16	dmlo_no005	N/O	a	1	165	3	Ar	Ar	6	-2.04965	-0.864007	-1.12145	-0.541374
no17	nf_no002	N/O	a	1	185	4	R	Me	6	-1.39567	1.63983	-1.70197	-0.581285
no18	nf_no006_cis	N/O	a	1	189	4	R	Me	6	-1.18574	1.28016	-1.30345	-0.0696648
no19	nf_no007	N/O	a	1	190	4	R	Me	6	-1.48689	1.61139	-1.07078	-0.399436
no20	nf_no008	N/O	a	1	191	4	R	Me	6	-1.80282	3.09111	-2.27972	0.00861654
oo_ch01	ldoo001_ch	O/O	s	1	66	3	R	H	7	1.37829	-1.22743	-1.07083	1.07911
oo_ch02	ldoo002_ch	O/O	s	1	67	3	R	Me	7	1.38853	-1.37779	-0.903361	0.756101
oo_ch03	ldoo003_ch	O/O	s	1	68	3	Ar	Ph	7	0.621734	-1.37723	-0.555359	0.760552
oo_ch04	ldoo004_ch	O/O	a	1	69	3	R	R/H	7	1.16986	-1.24139	-0.794718	0.644949
oo_ch05	ldoo005_ch	O/O	a	1	70	3	R	R/Me	7	1.23721	-1.38495	-0.737061	0.241161
oo_ch06	ldoo006_ch	O/O	a	1	71	3	Ar/R	Ph/R	7	0.760524	-1.48426	-0.340062	0.308411
oo_ch07	ldoo007_ch	O/O	a	1	72	3	R	Me/H	7	1.13218	-2.70993	-3.31641	3.73177
oo_ch08	ldoo011_ch	O/O	a	1	100	3	0	0	7	-0.553714	-3.26647	-1.84515	0.817884
oo01	nf_oo001	O/O	s	1	193	1	R	Me	7	-5.21362	2.10955	0.905134	3.5494
oo02	nf_oo002	O/O	s	1	194	2	R	Me	7	-3.98308	0.613747	-0.355838	0.982222
oo03	nf_oo005	O/O	s	1	197	2	R	Me	7	-4.27521	0.989963	0.297962	1.20628
oo04	ldoo009	O/O	a	1	41	2	R	Me	7	-4.15374	0.587815	1.05826	0.686099
oo05	ldoo010	O/O	a	1	n	2	Ar/H	Ph/H	7	-4.41355	-0.881264	-4.00903	1.36946
oo06	nf_oo003	O/O	s	1	195	3	R	Me	7	-3.38104	0.746732	-1.18204	-0.489
oo07	nf_oo004	O/O	s	1	196	4	R	Me	7	-3.05422	1.04935	-1.60258	-0.178819
oo08	dmlo_oo003	O/O	s	1	162	4	0	0	7	-3.13921	-0.459681	-2.14668	-1.03537
oo09	dmlo_oo004	O/O	s	1	163	4	0	0	7	-2.90803	0.37822	-2.21767	-1.44125
oo10	dmlo_oo005	O/O	s	1	166	4	0	0	7	-4.13572	-0.916498	-2.12389	-0.880355
oo11	dmlo_oo006	O/O	s	1	167	4	0	0	7	-3.51032	-1.40846	-2.50287	-1.46046
